# Supplementary material for: Directed nucleophilic addition of phenoxides to cyclopropenes
Source: Royal Society of Chemistry journal article supplement (doi:10.1039/c7ob01785e), 2017-01-01
Supplement: c7ob01785e1.pdf [file c7ob01785e1.pdf]

## **Directed Nucleophilic Addition of Phenoxides to Cyclopropenes**

Pavel Yamanushkin, Michael Lu-Diaz, Andrew Edwards, Marina Rubina, and Michael Rubin\*

### **Supporting Information**

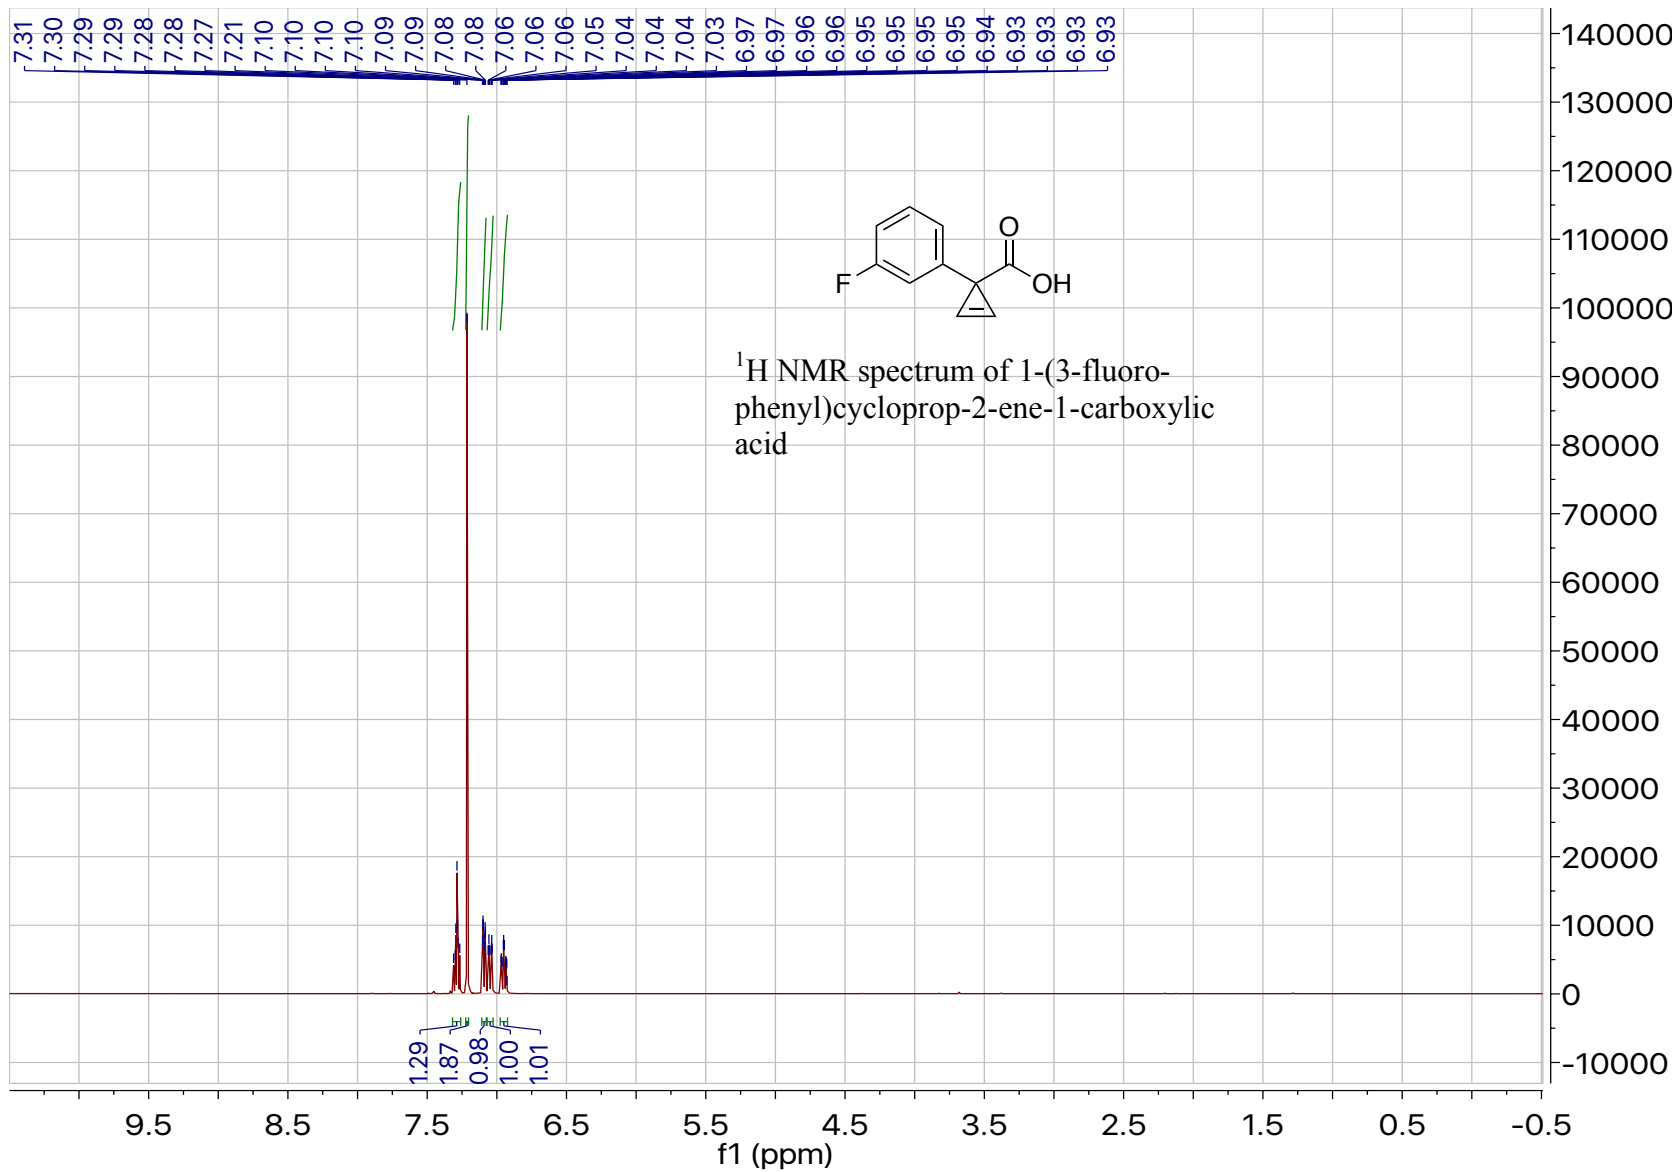

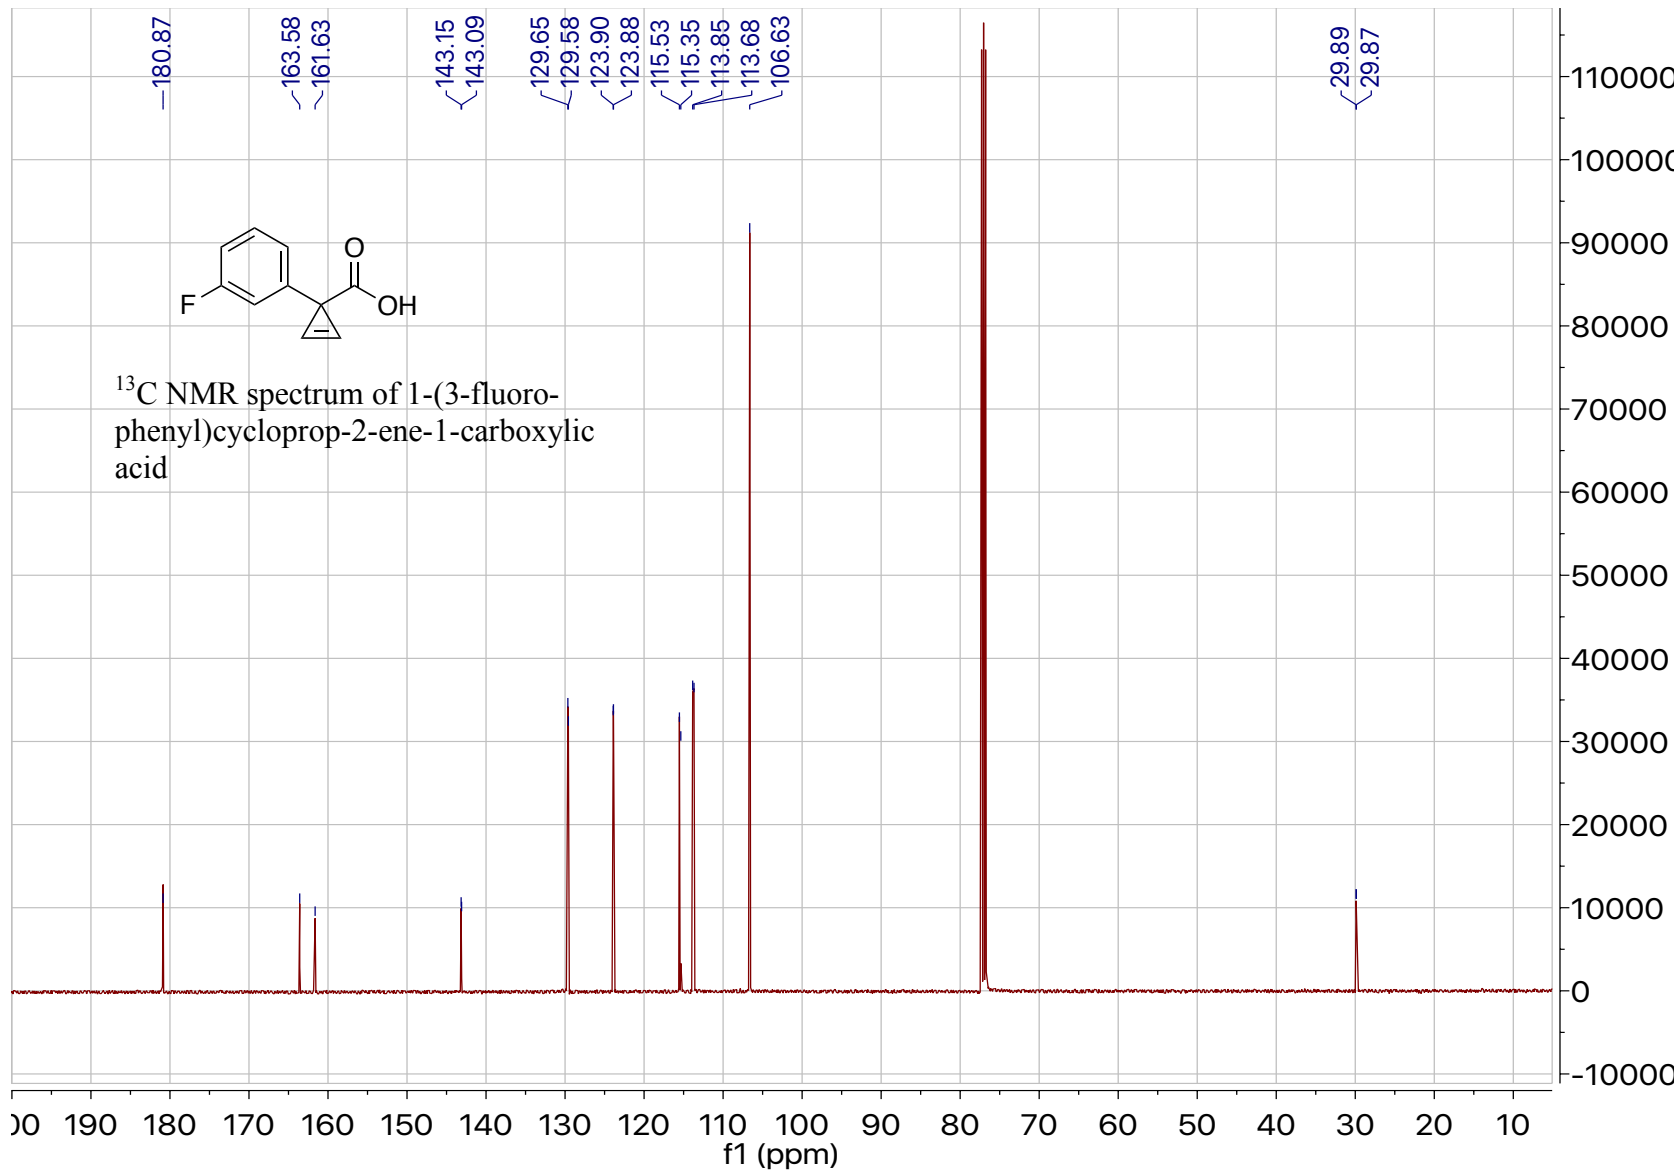

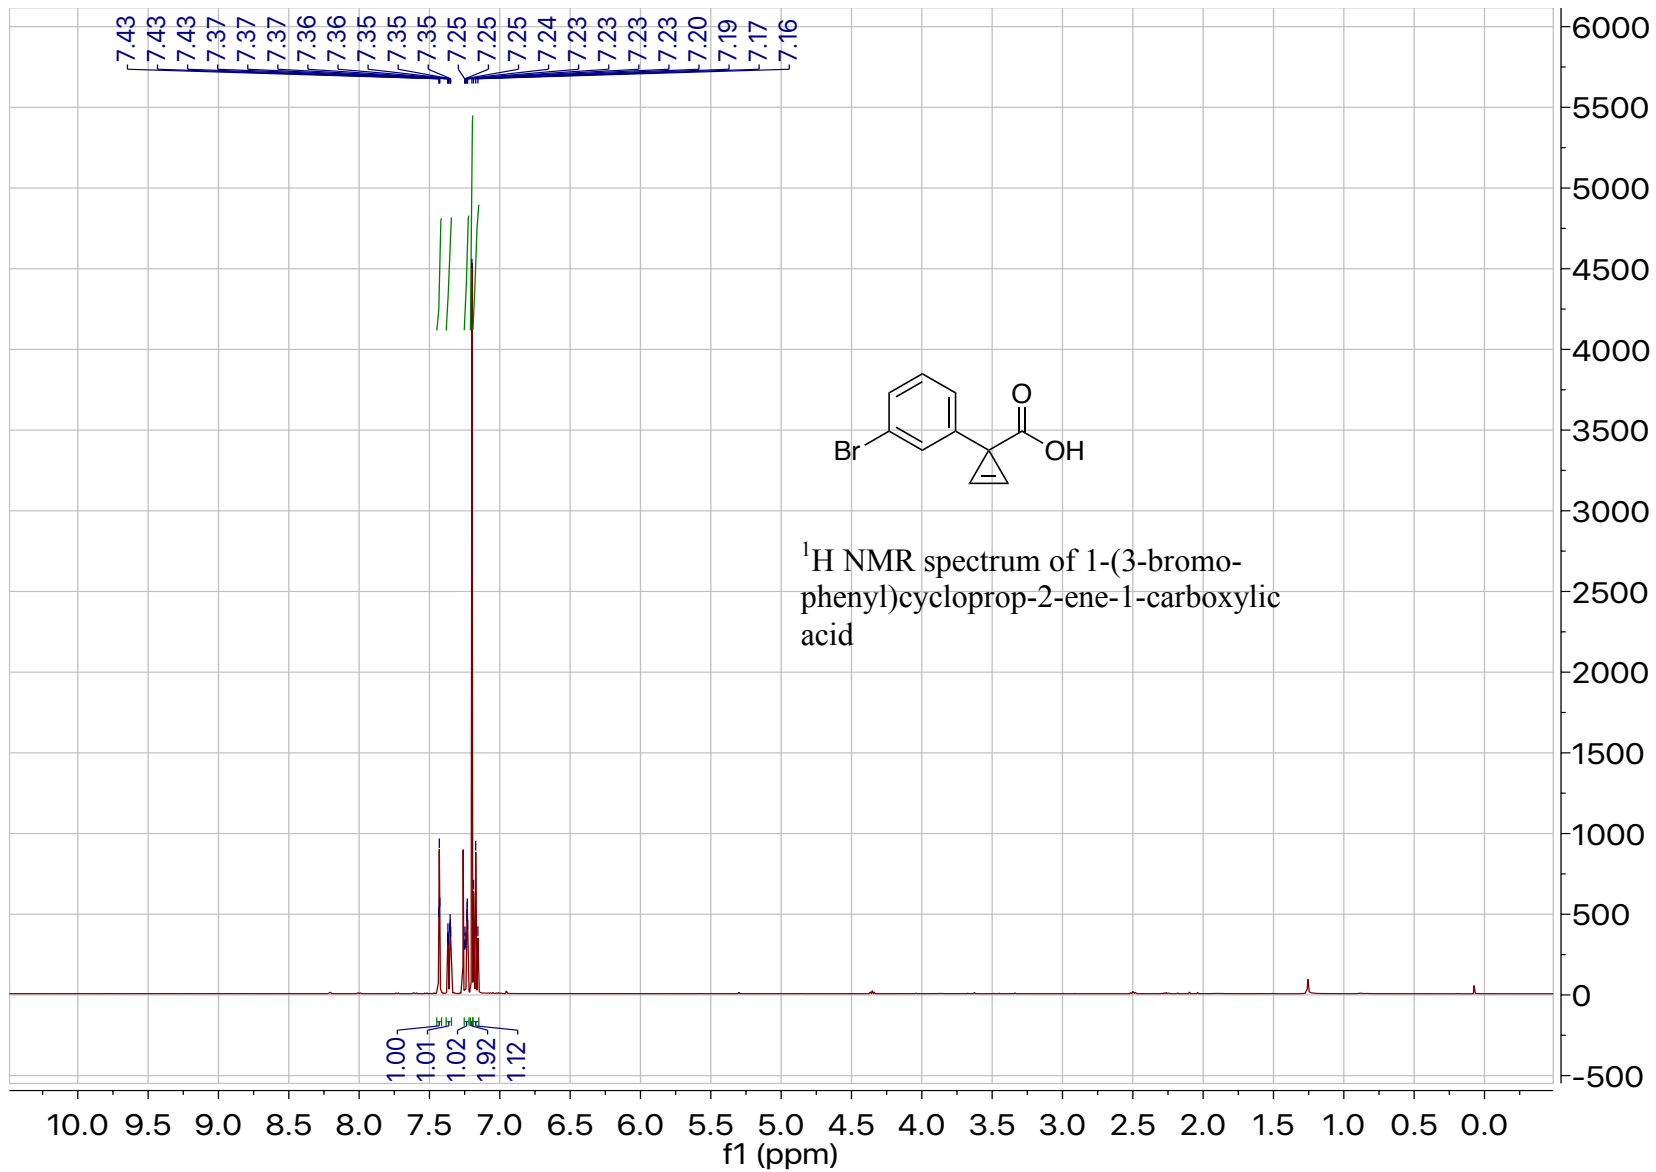

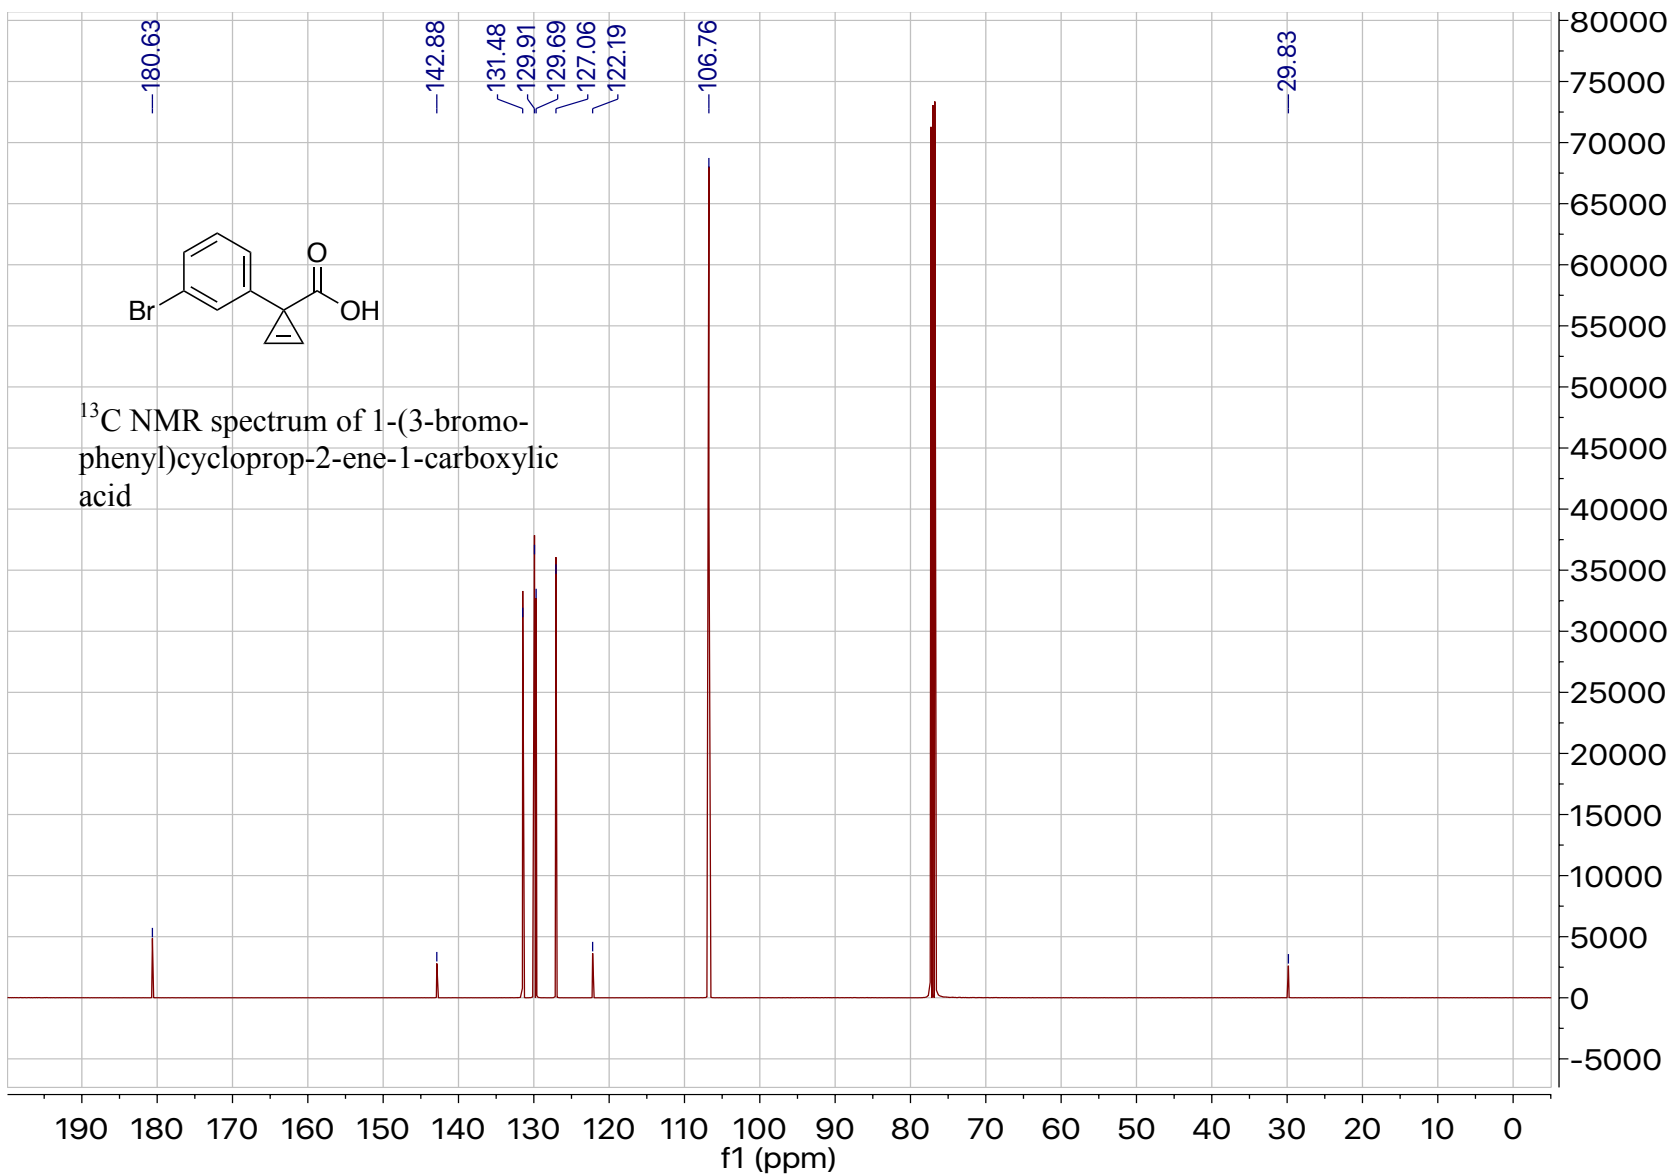

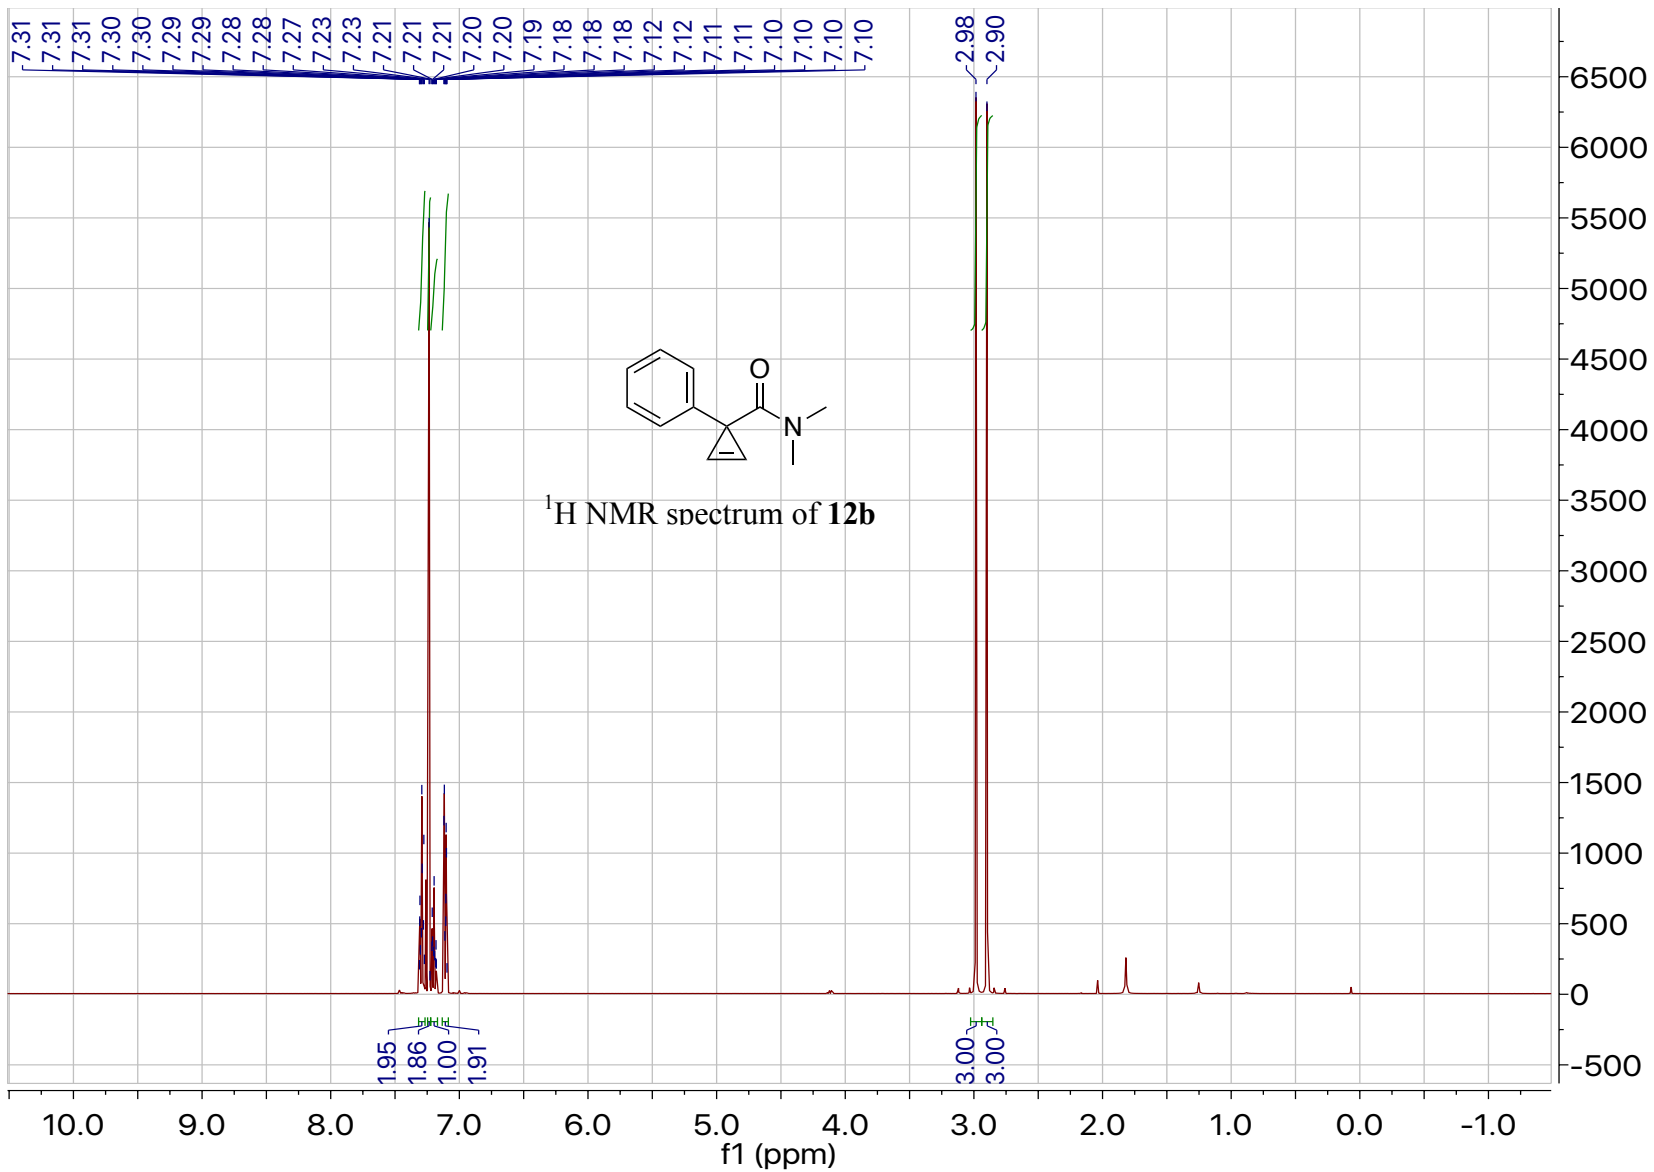

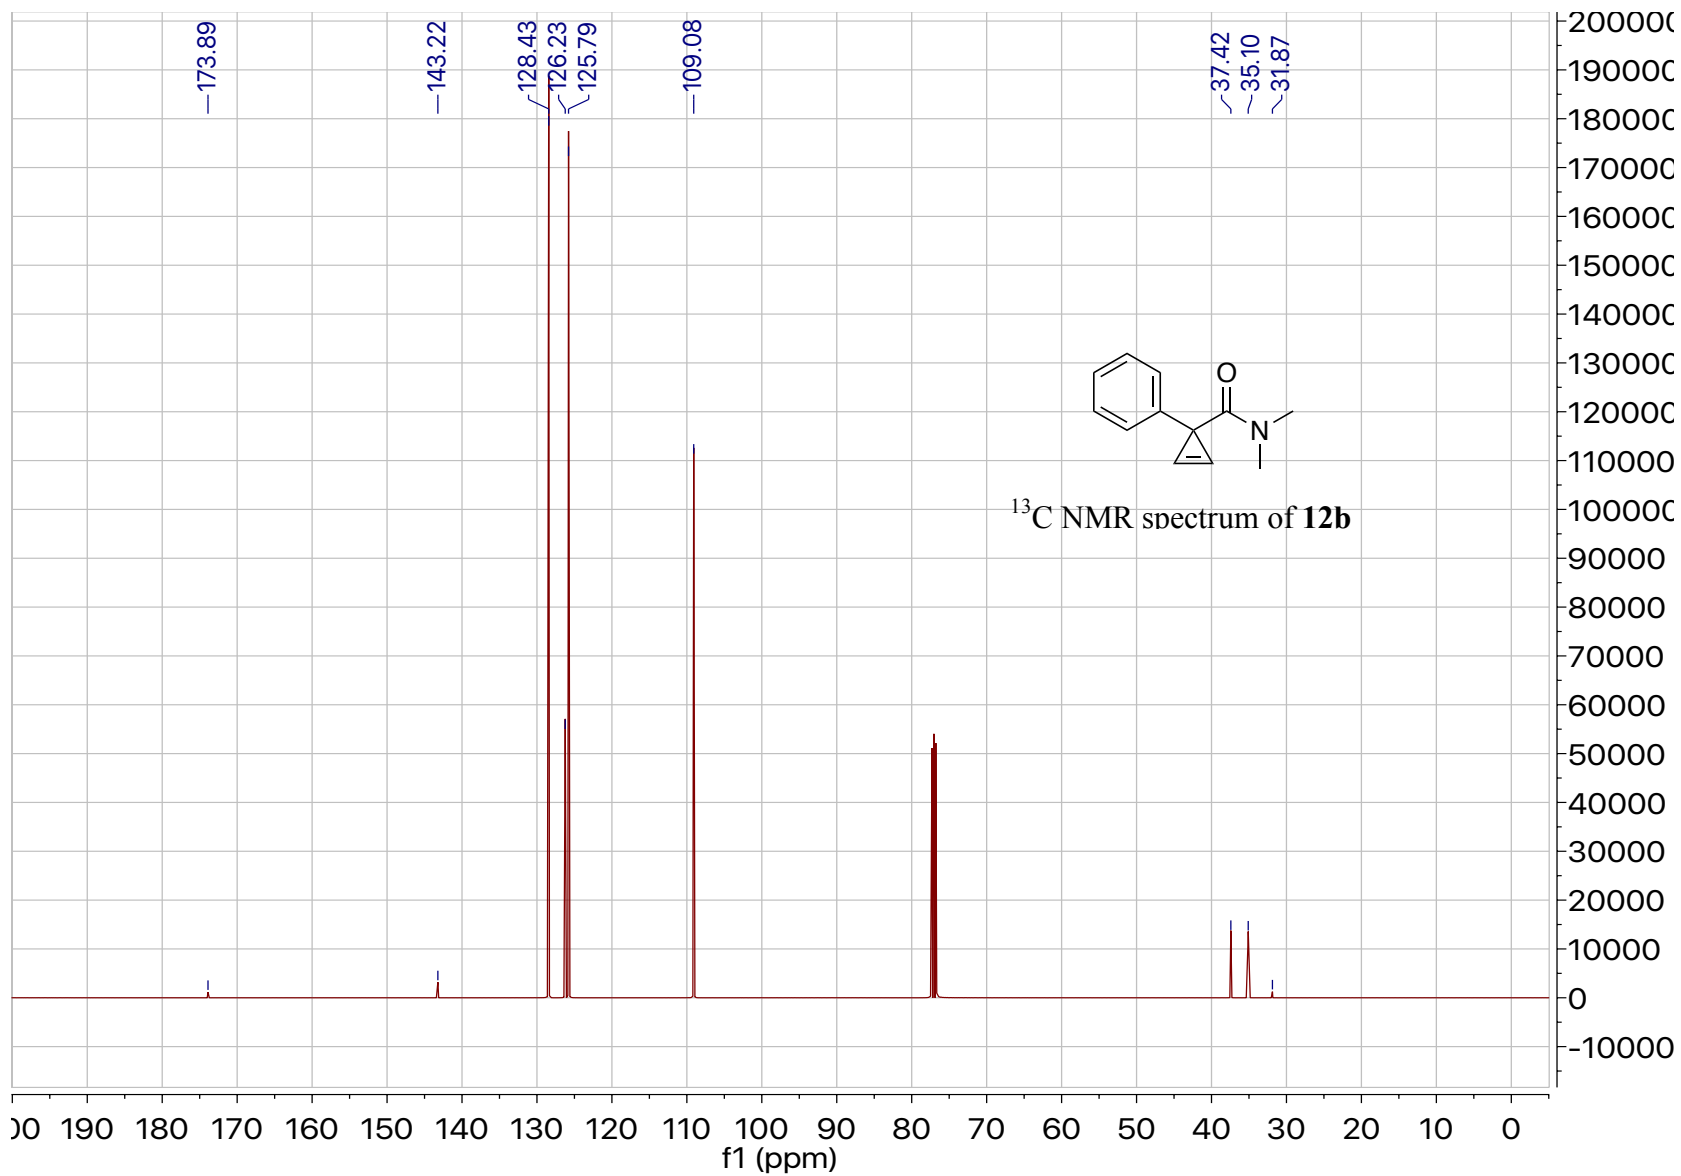

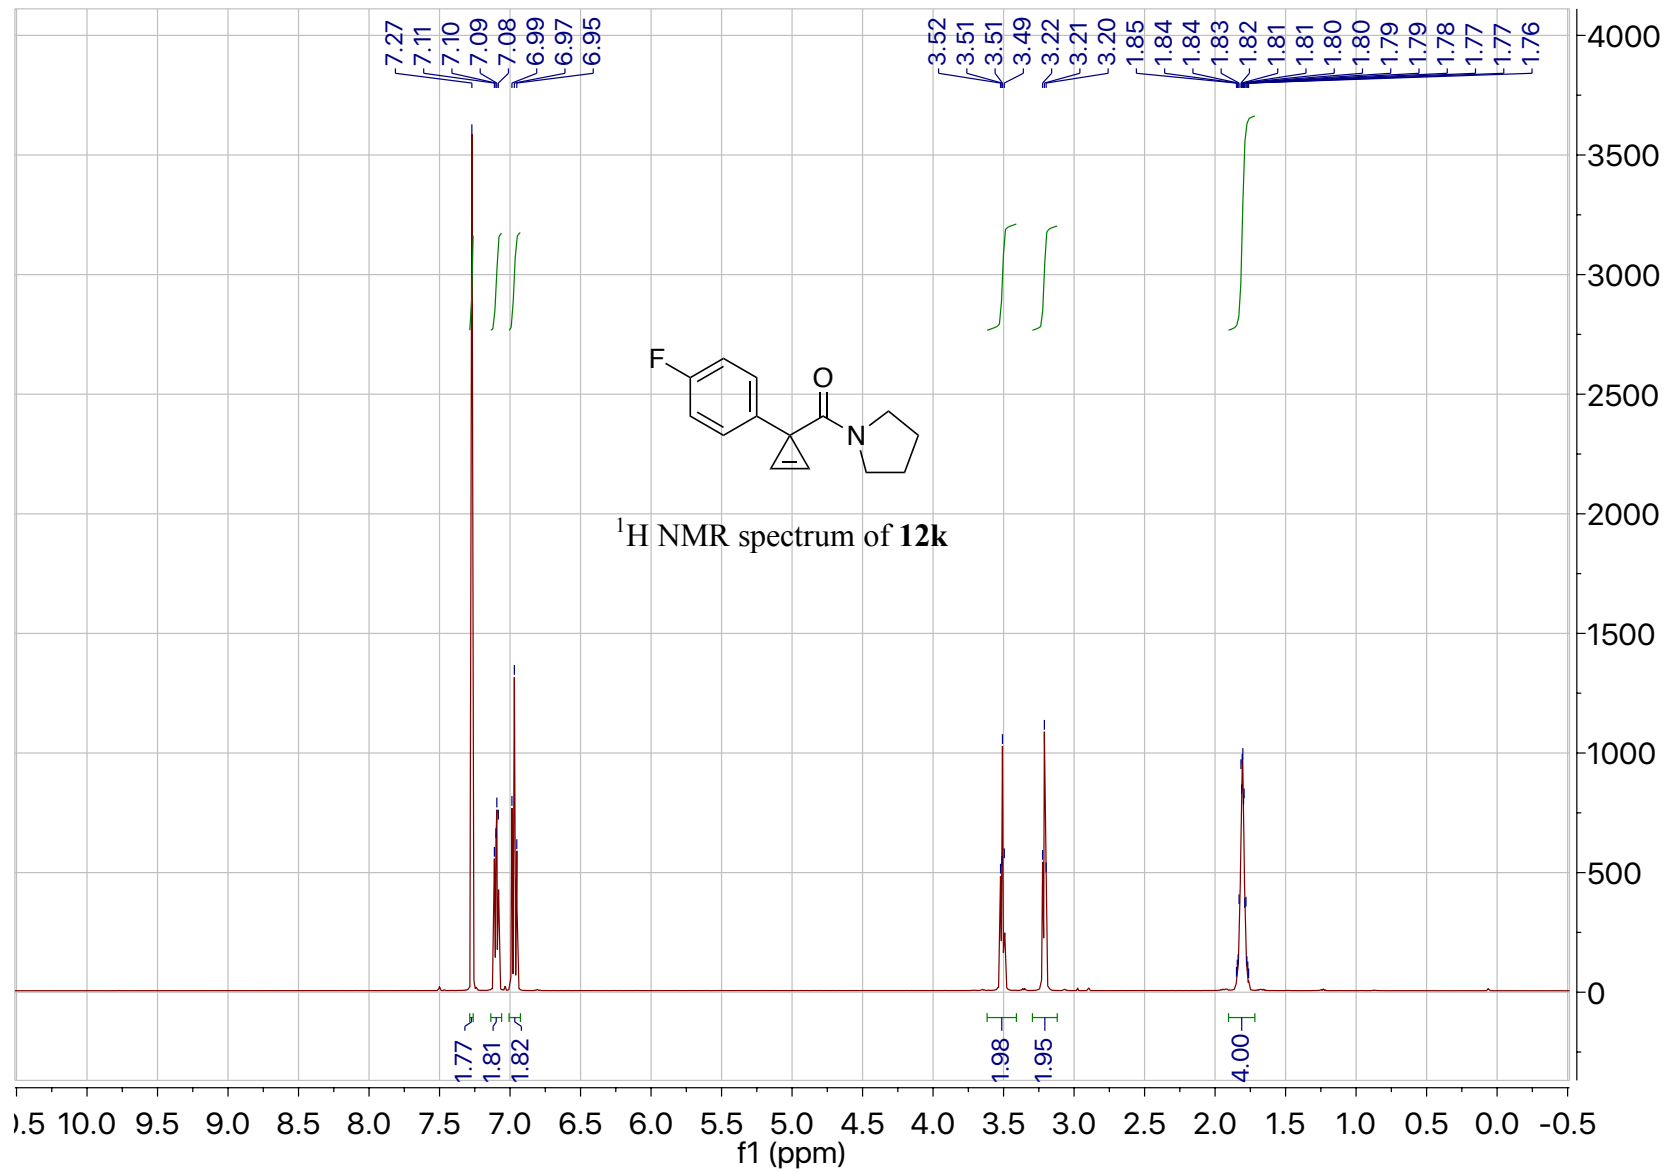



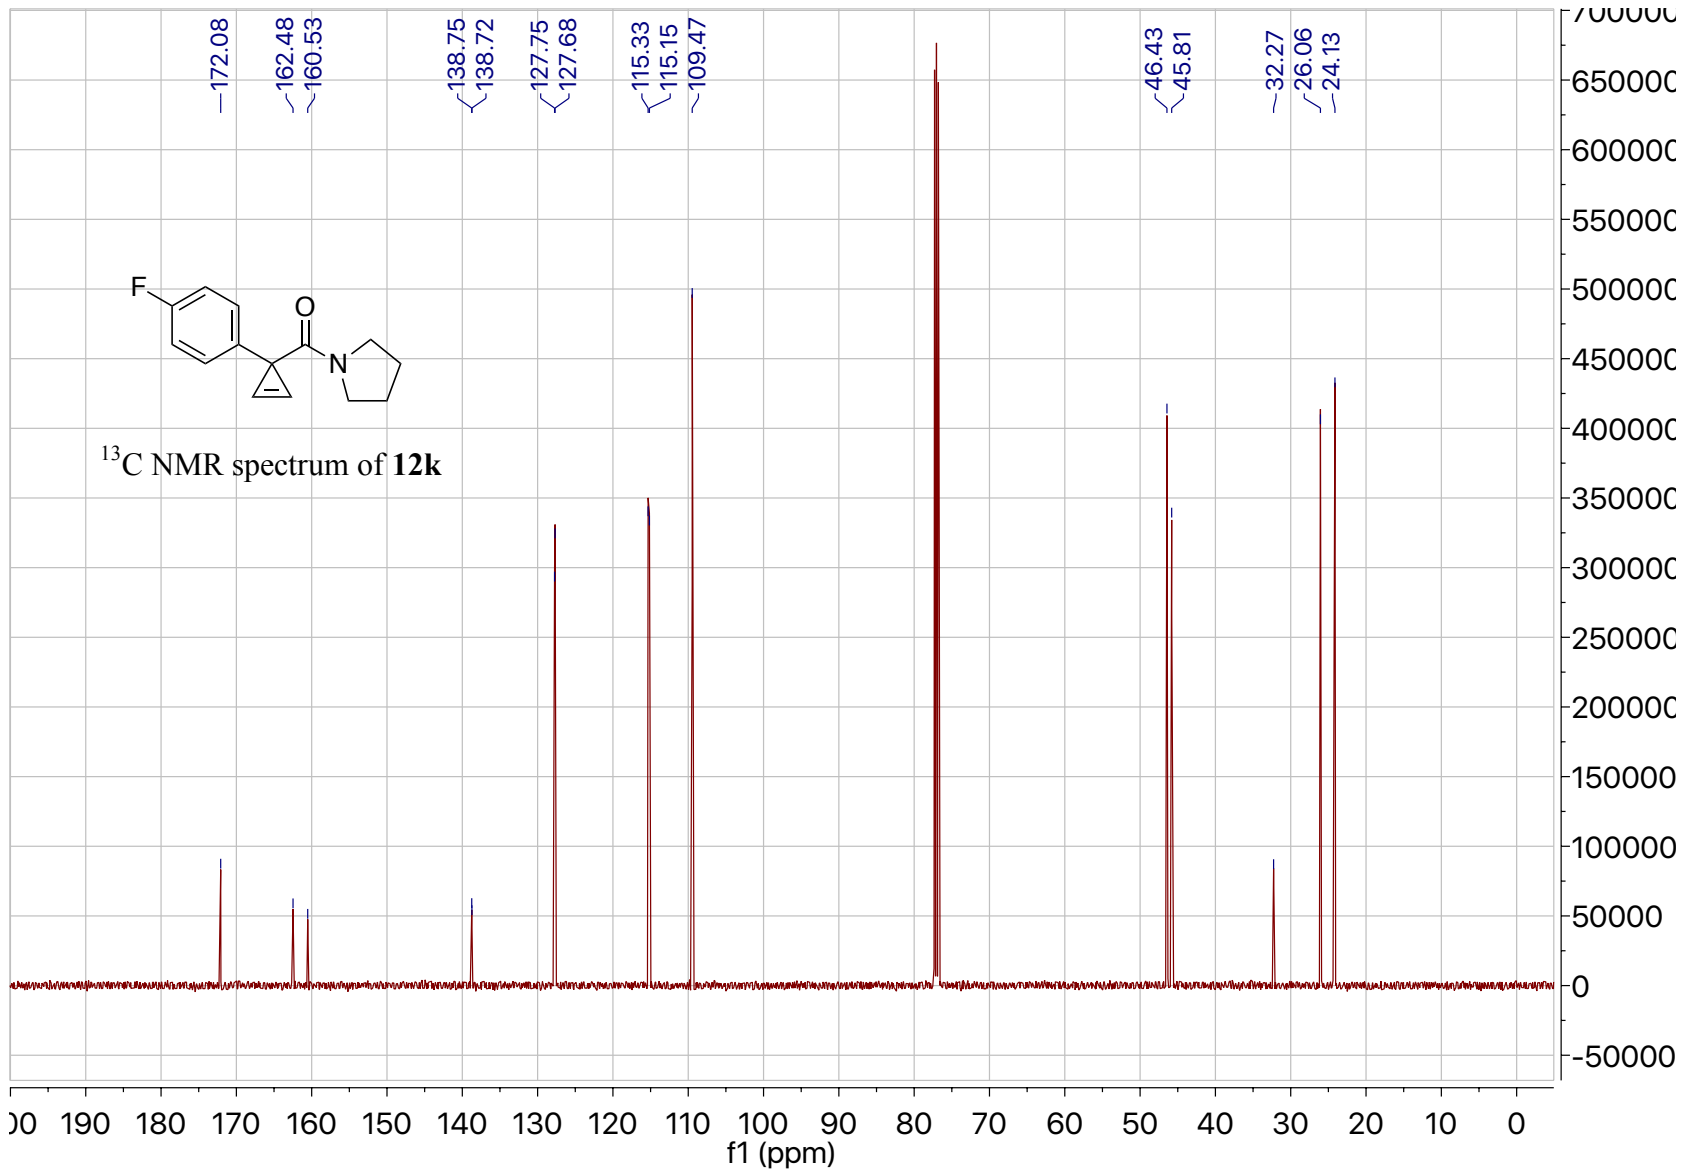

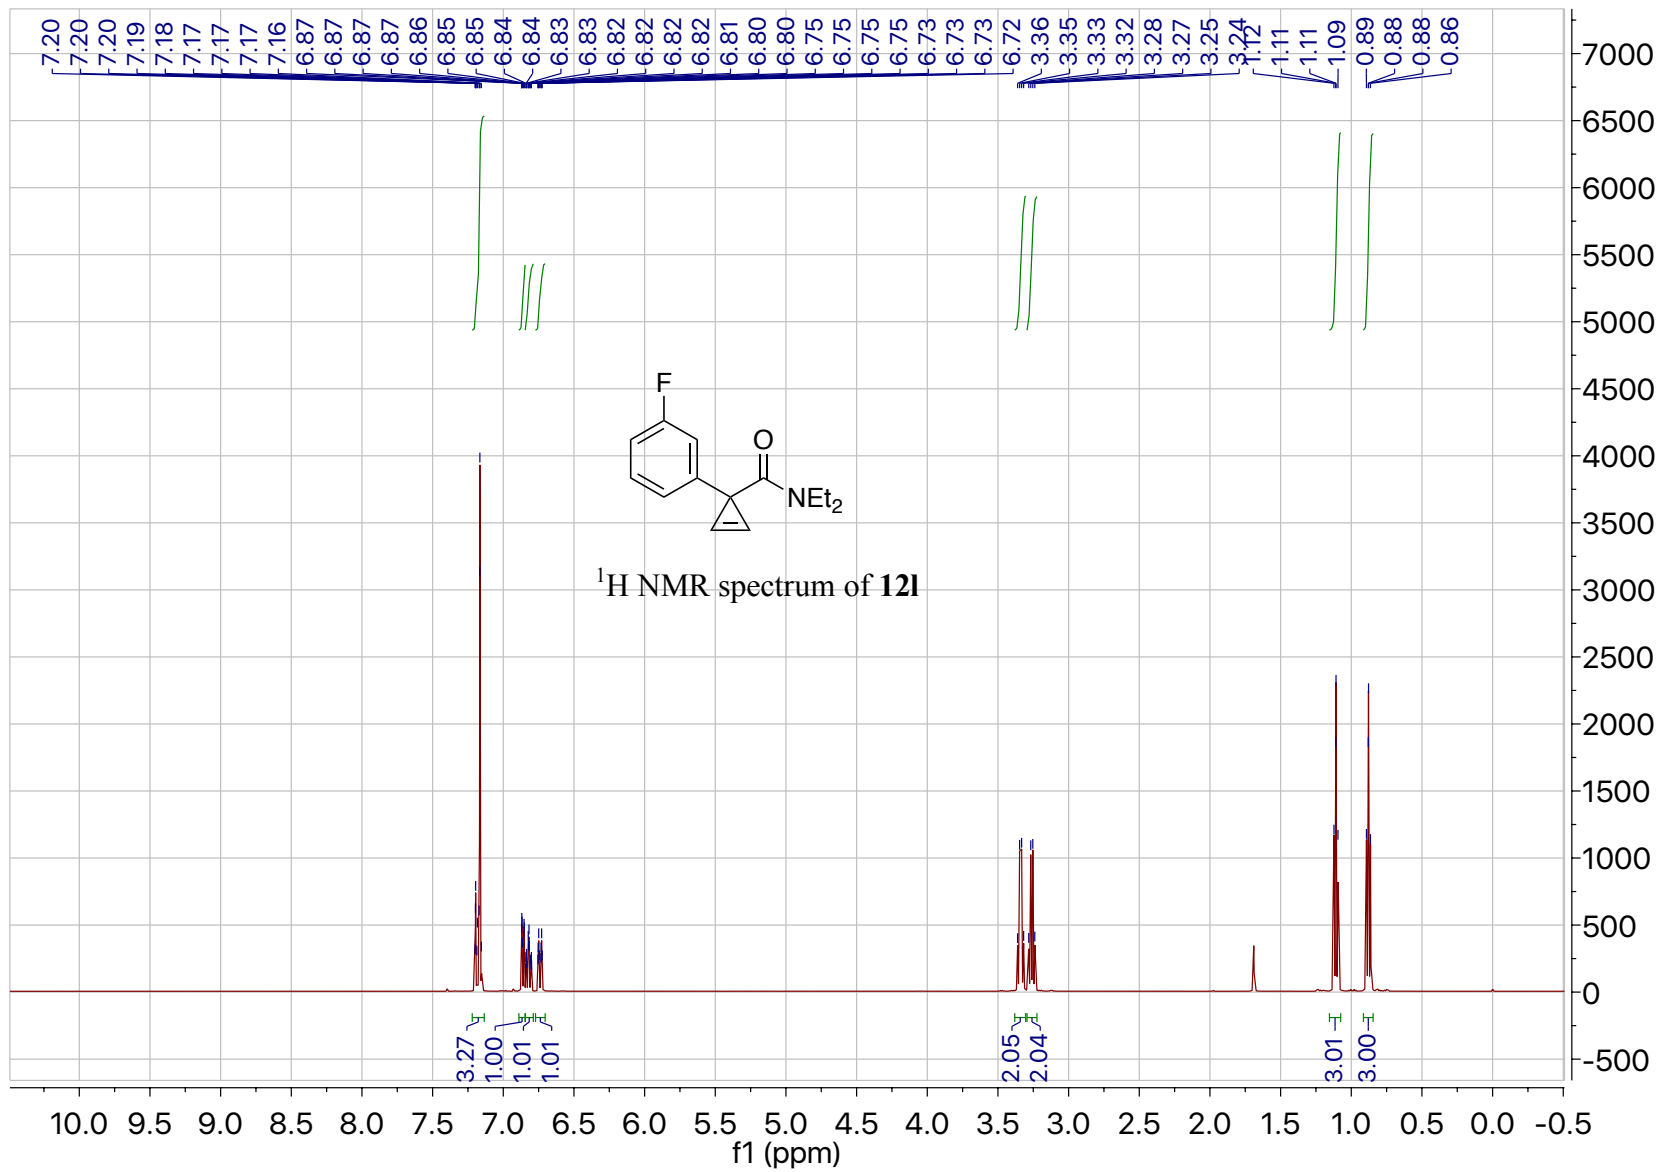

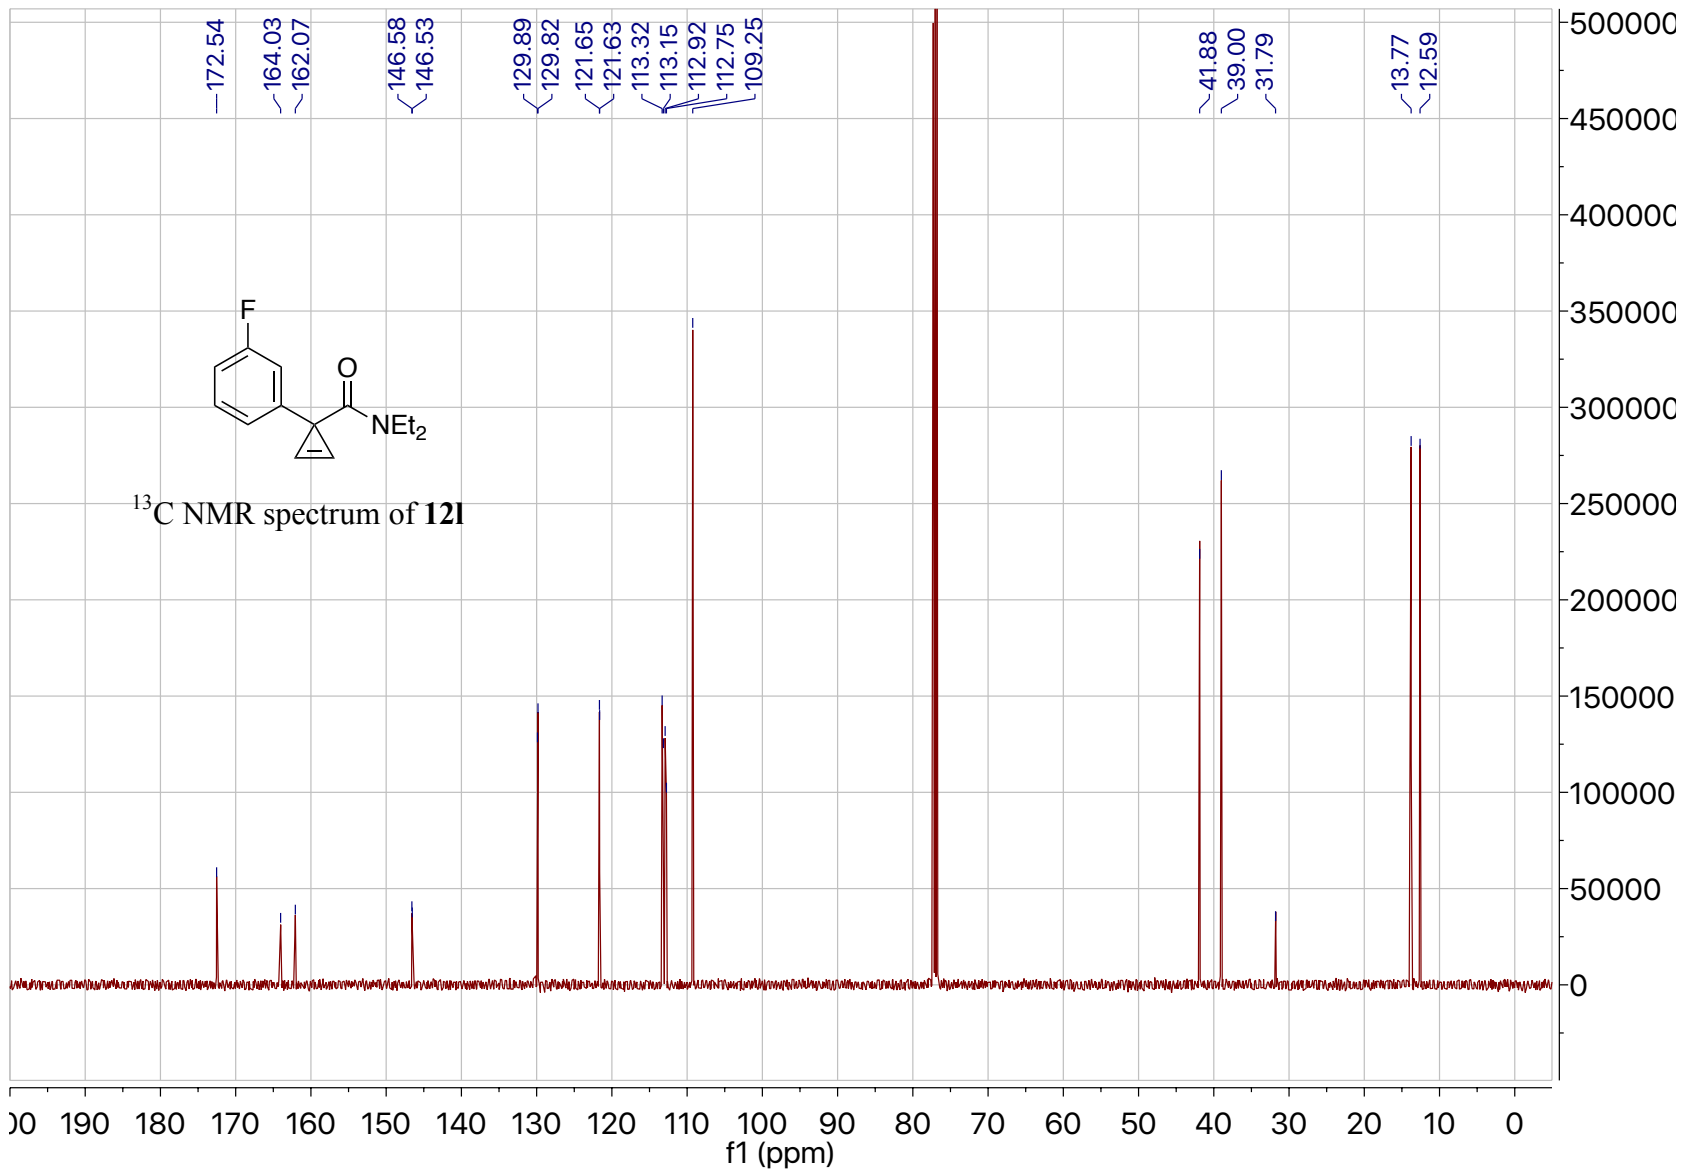

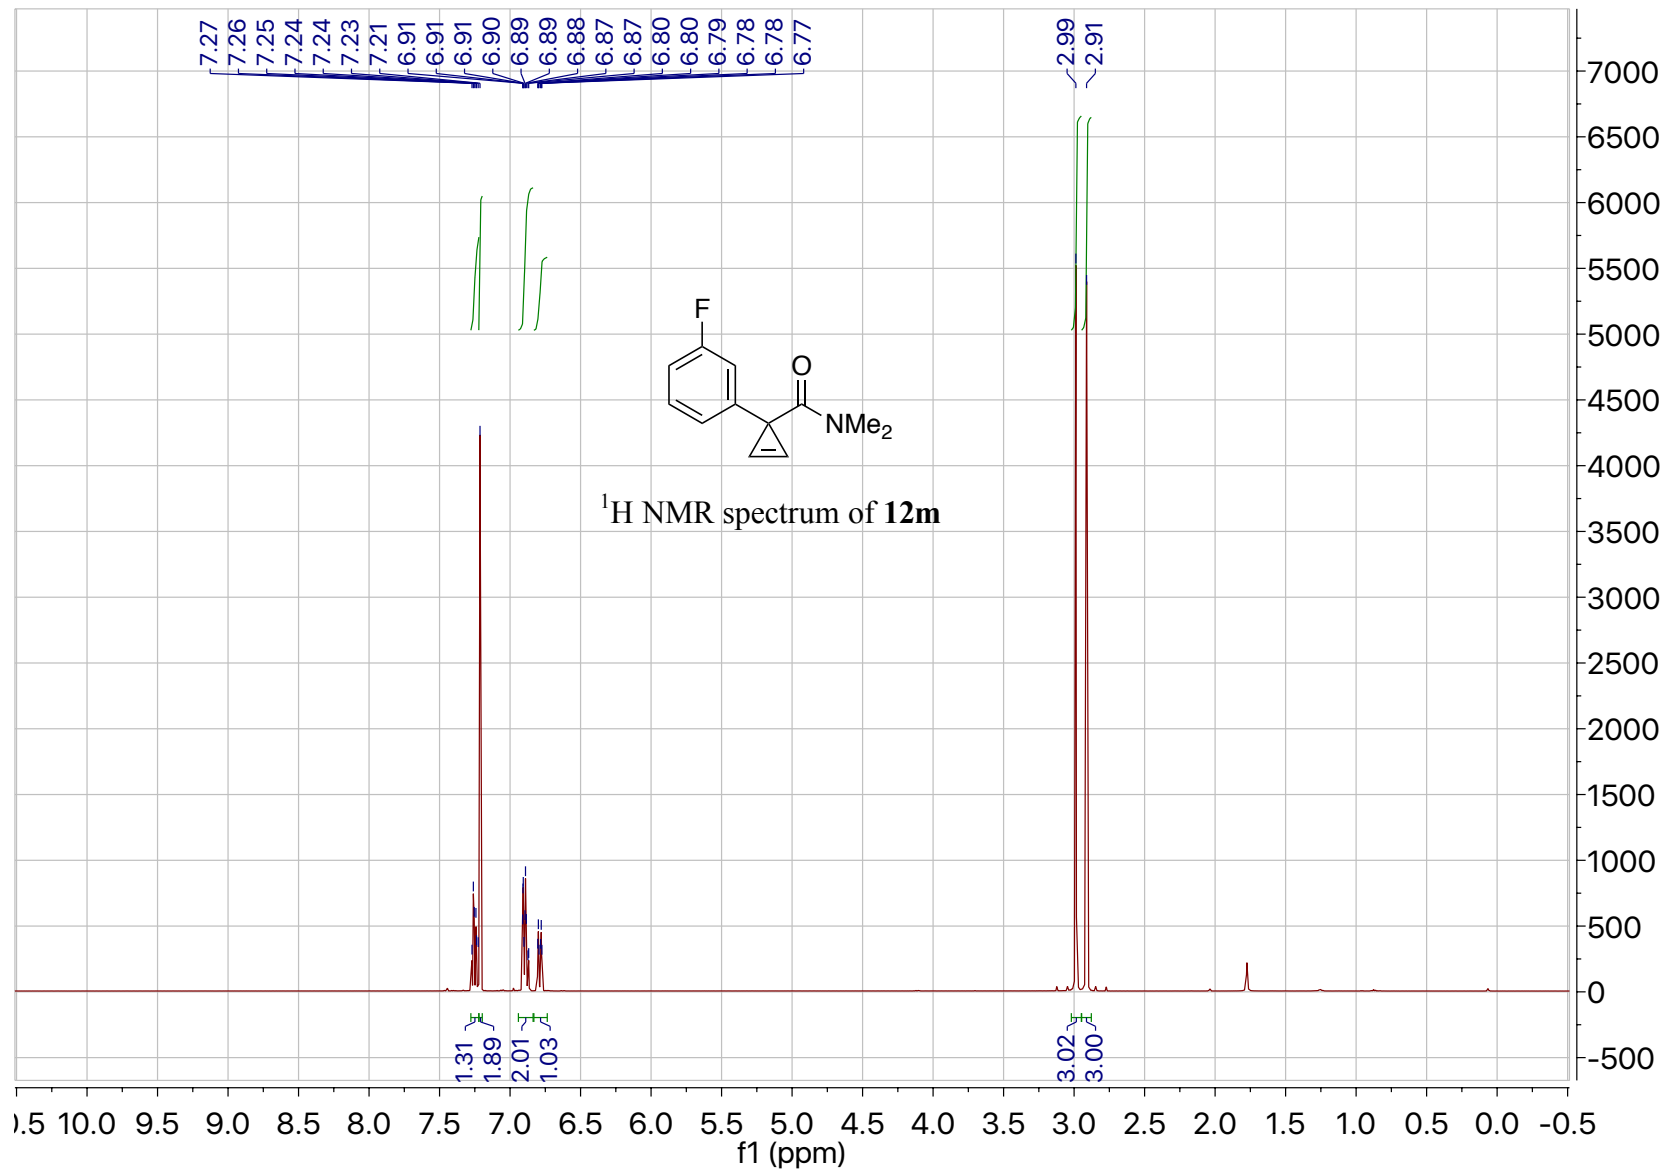

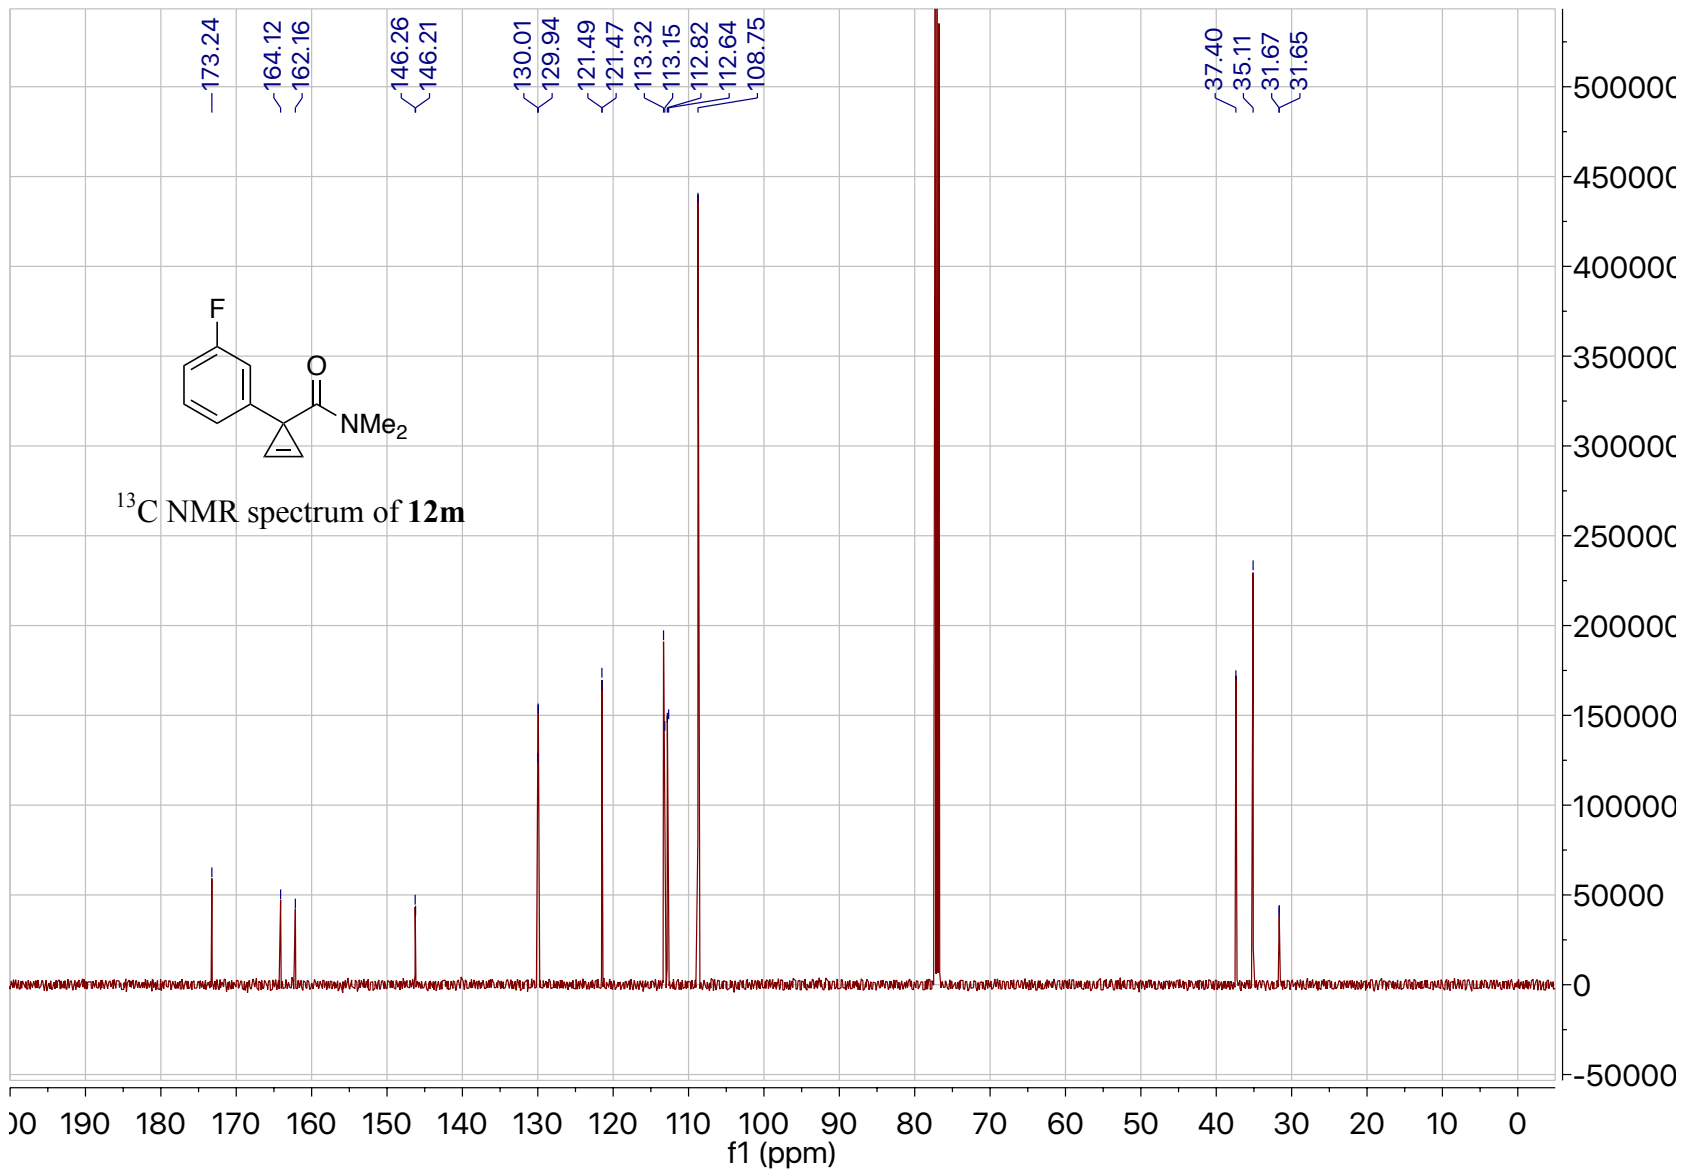

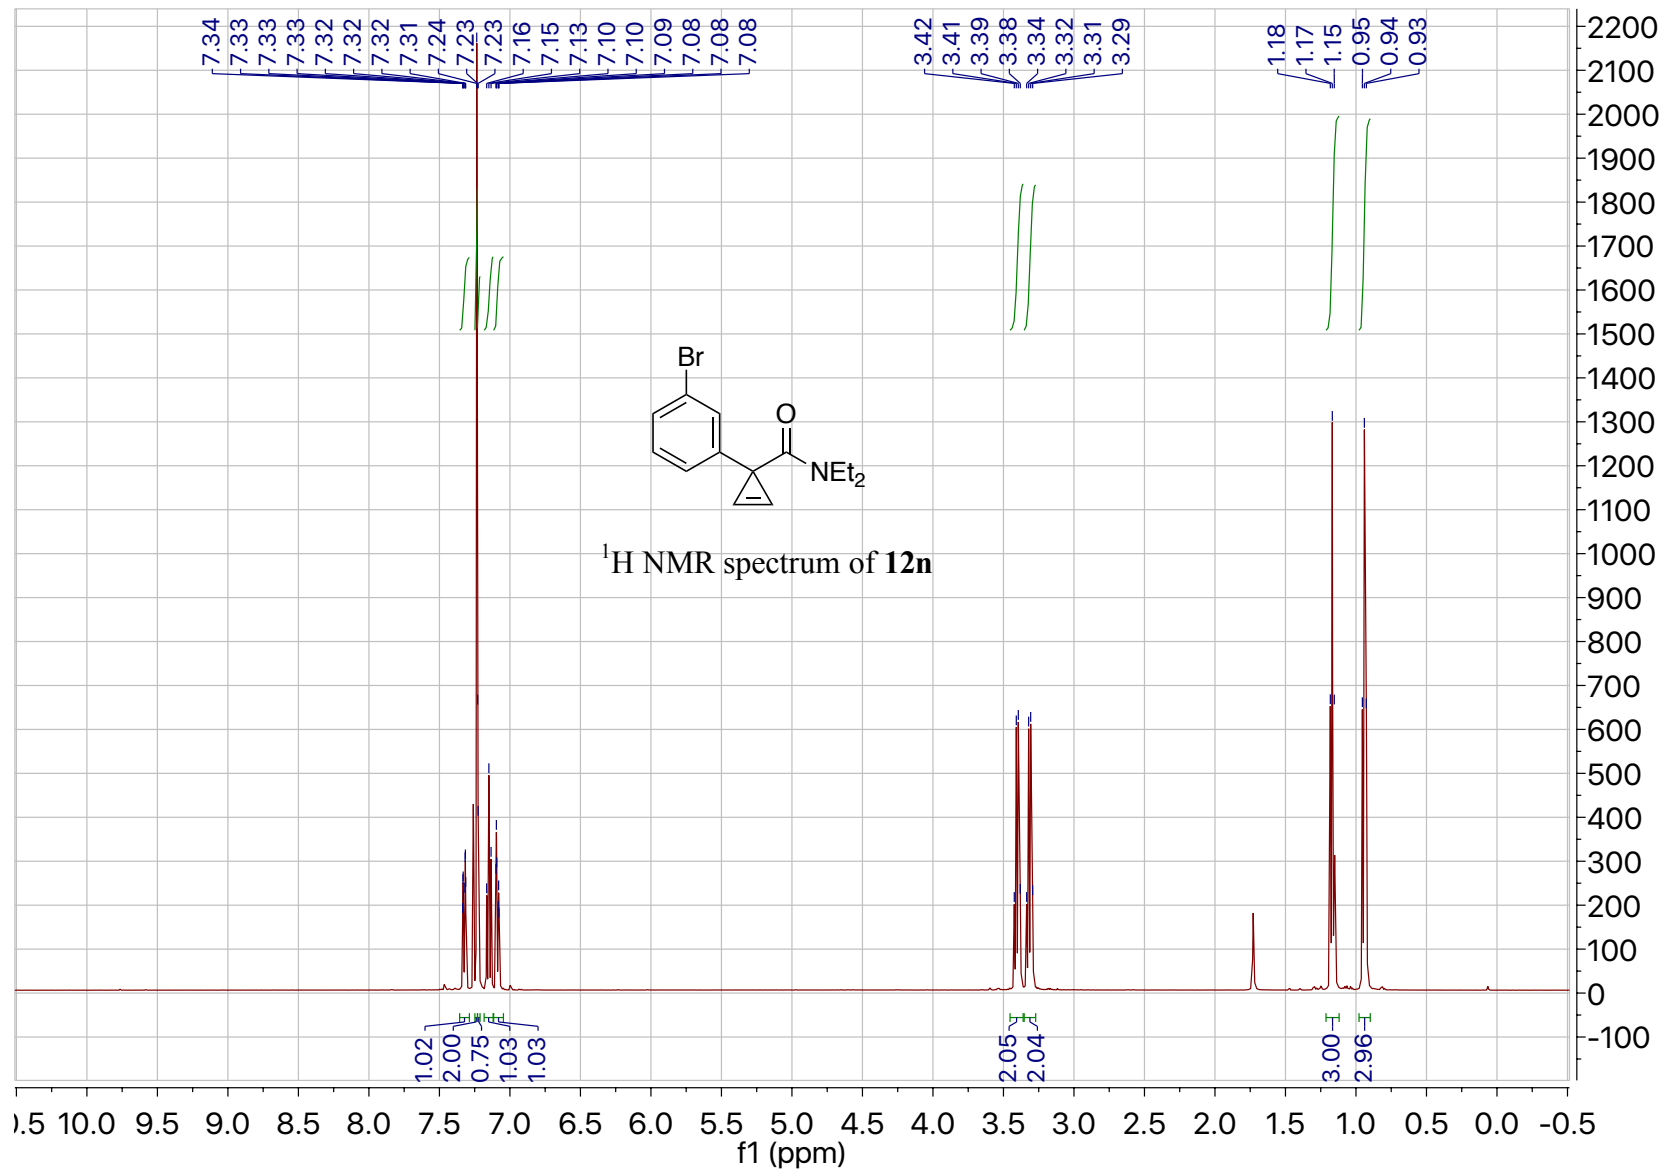

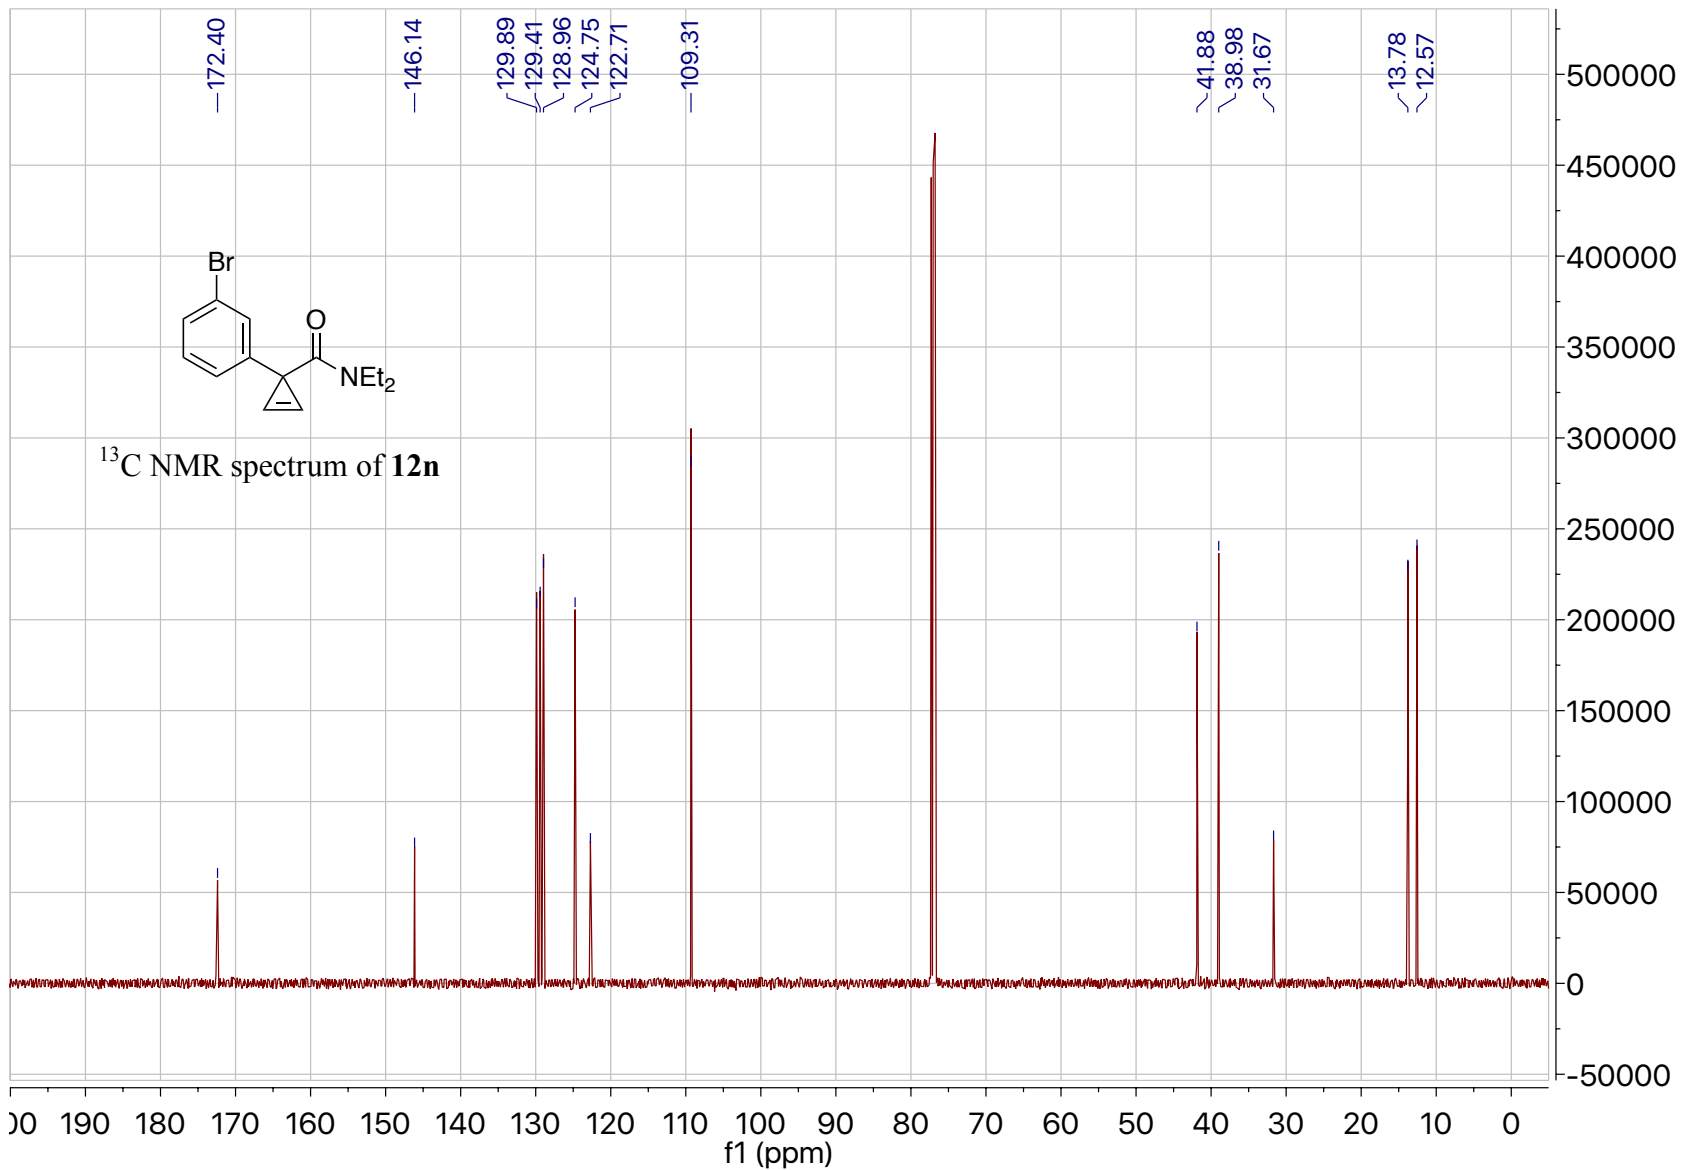

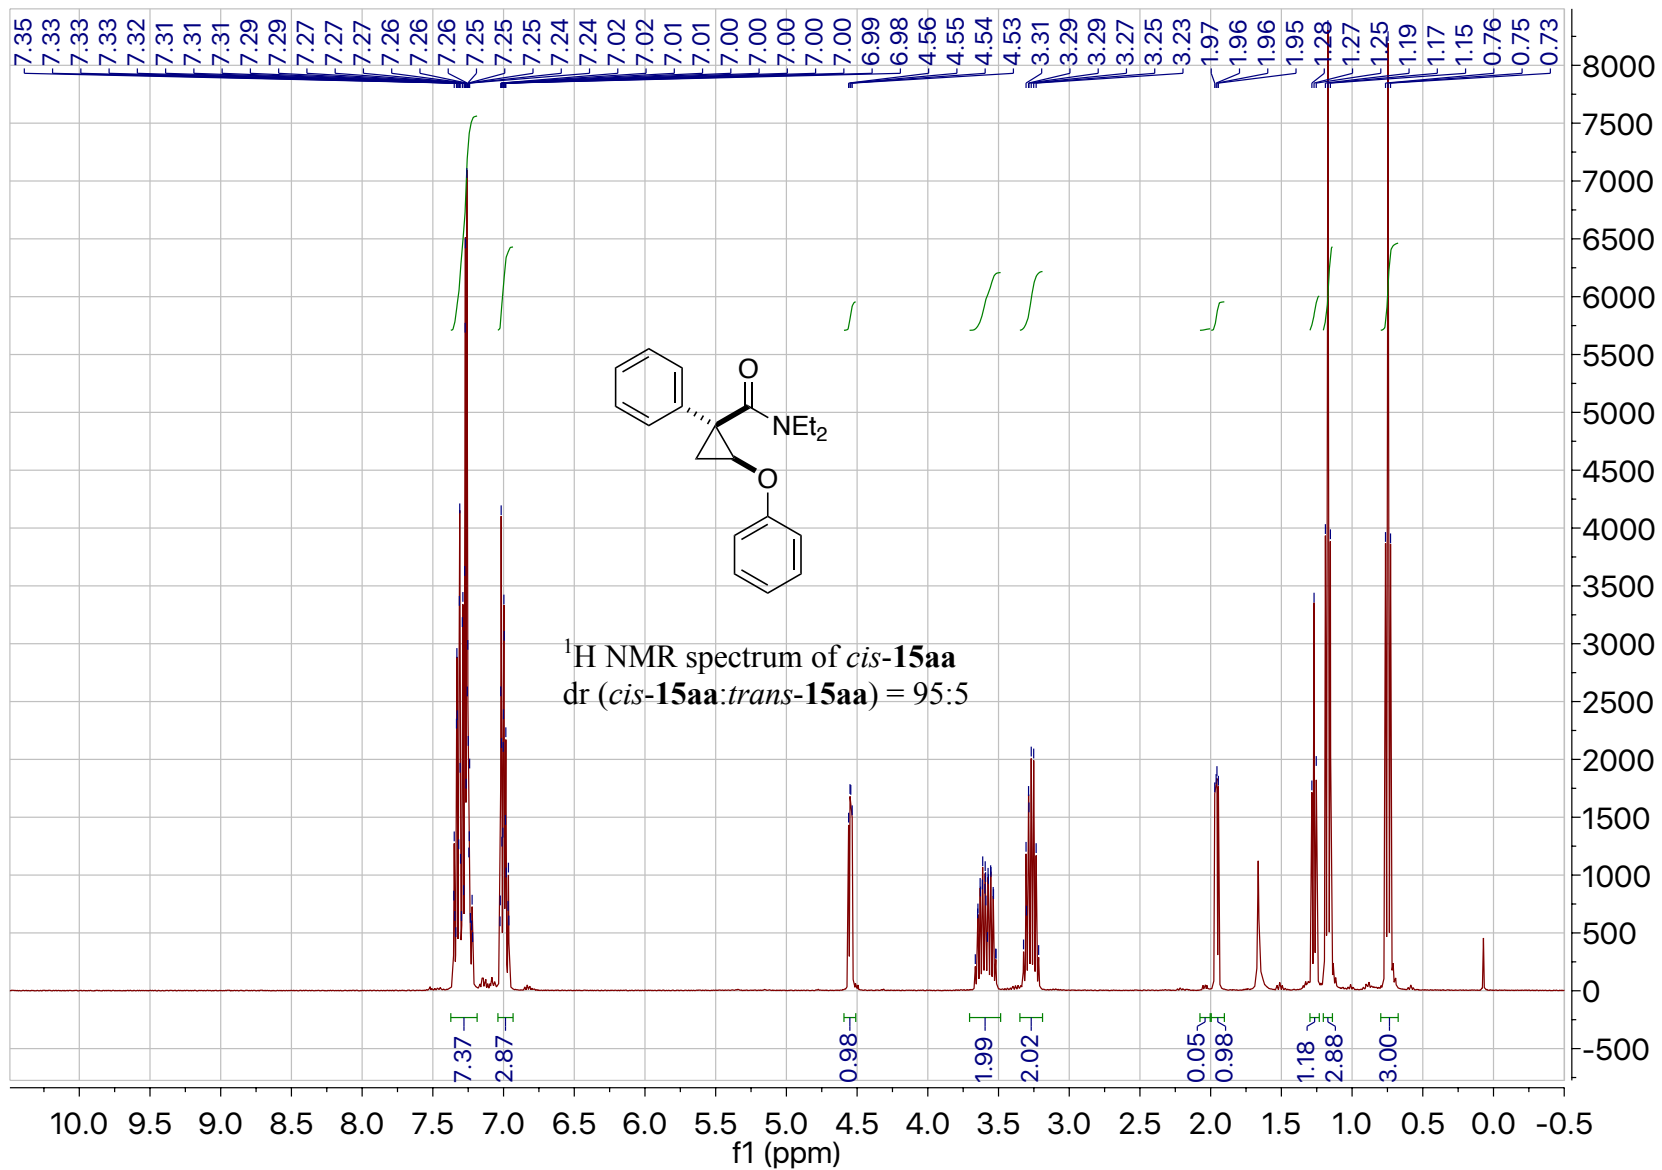



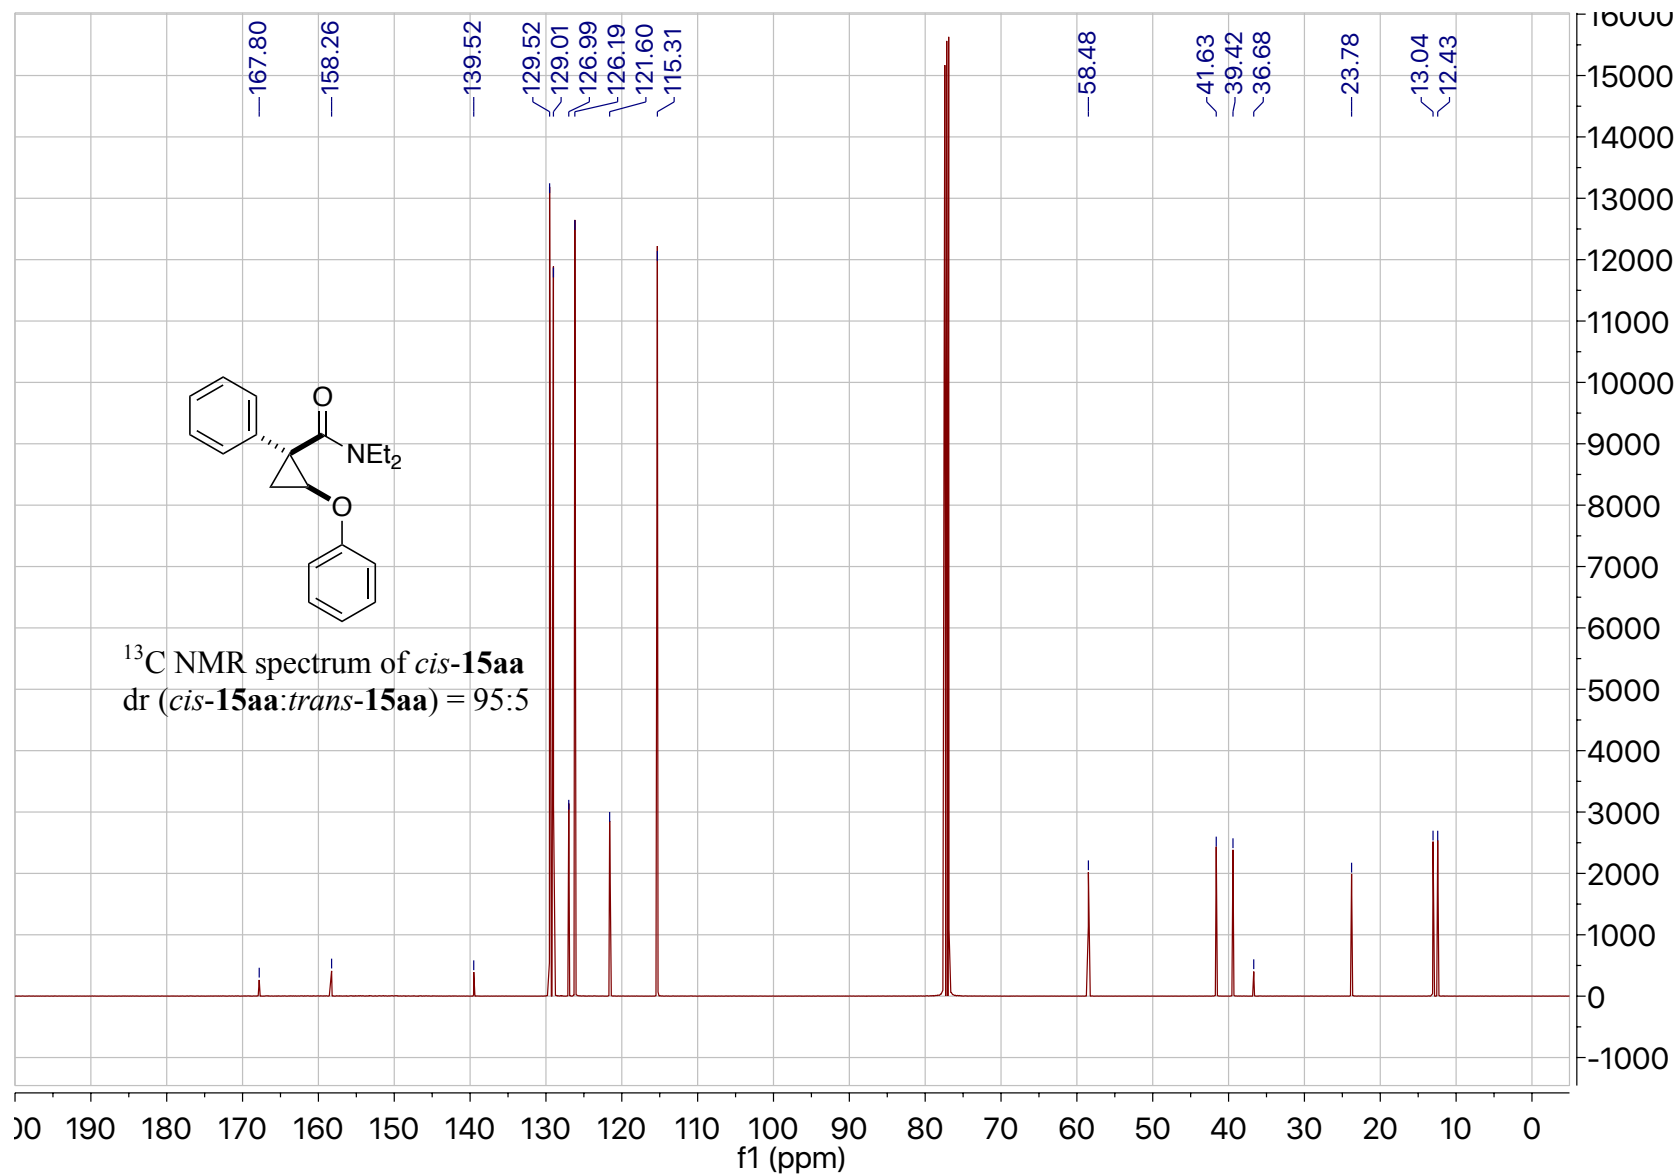

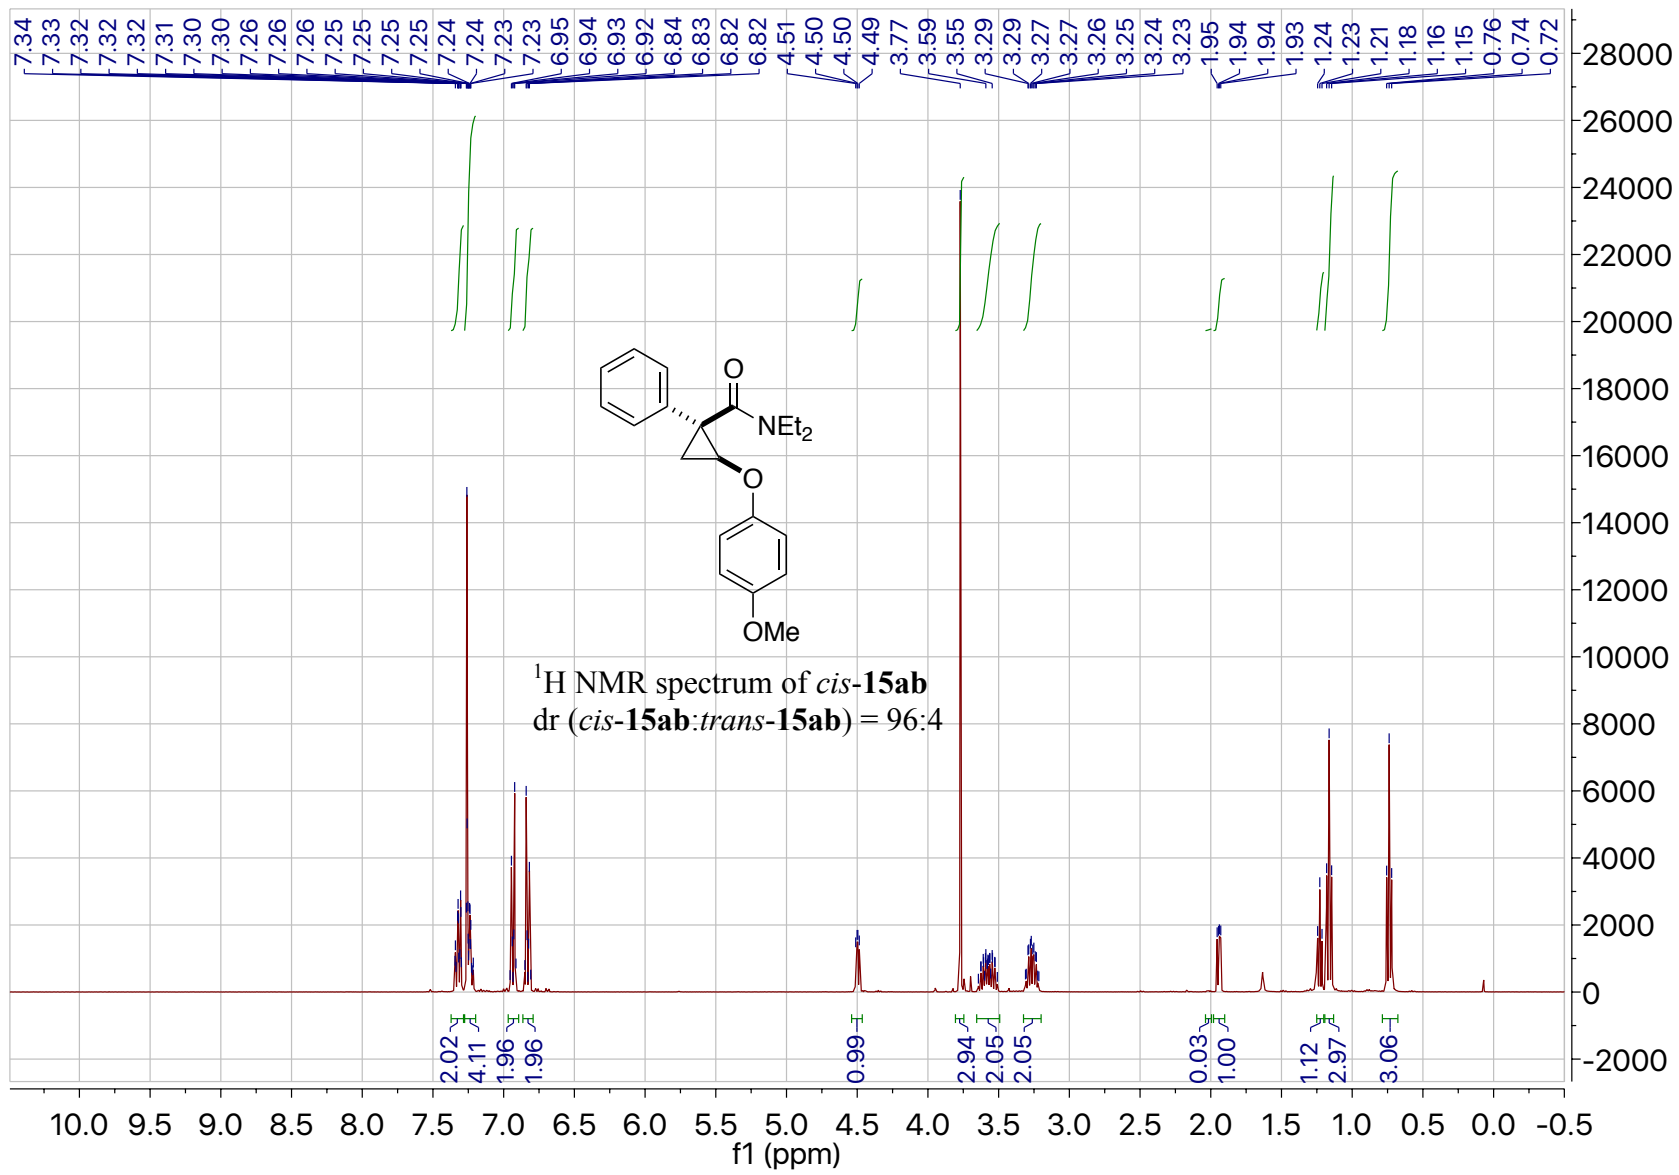

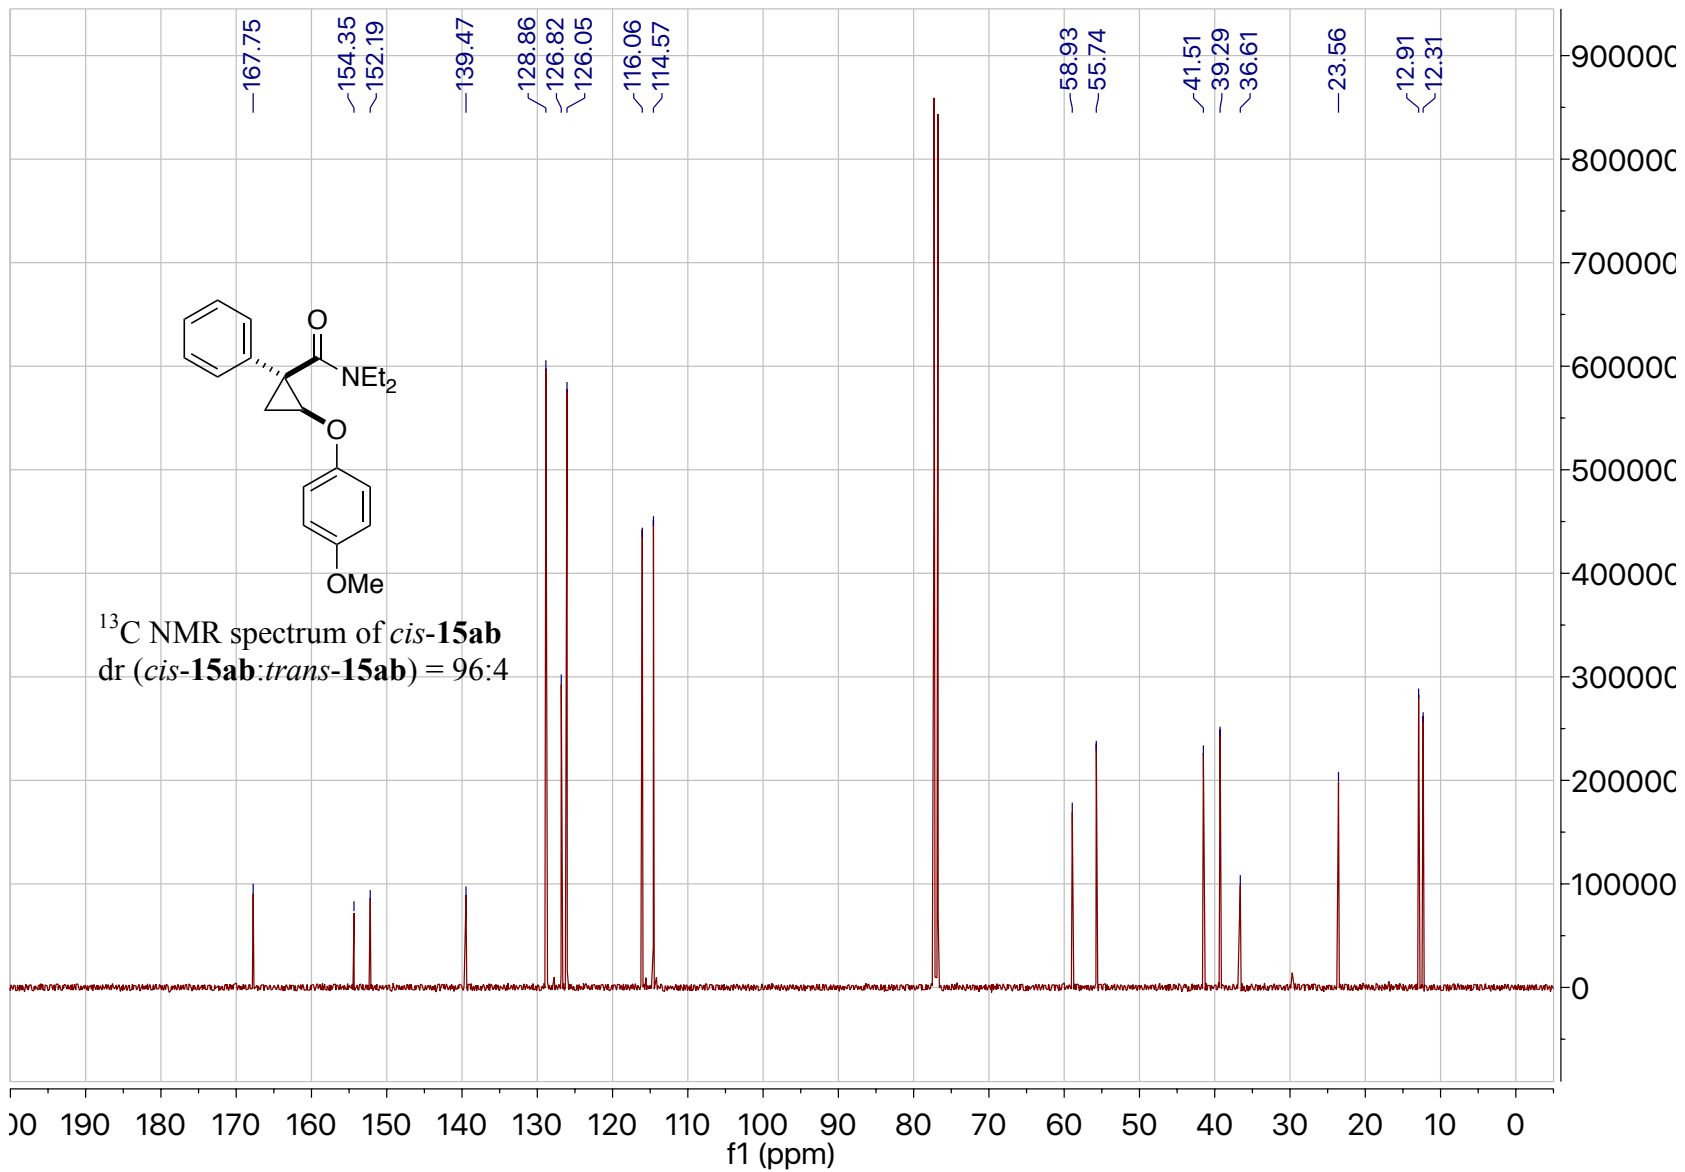

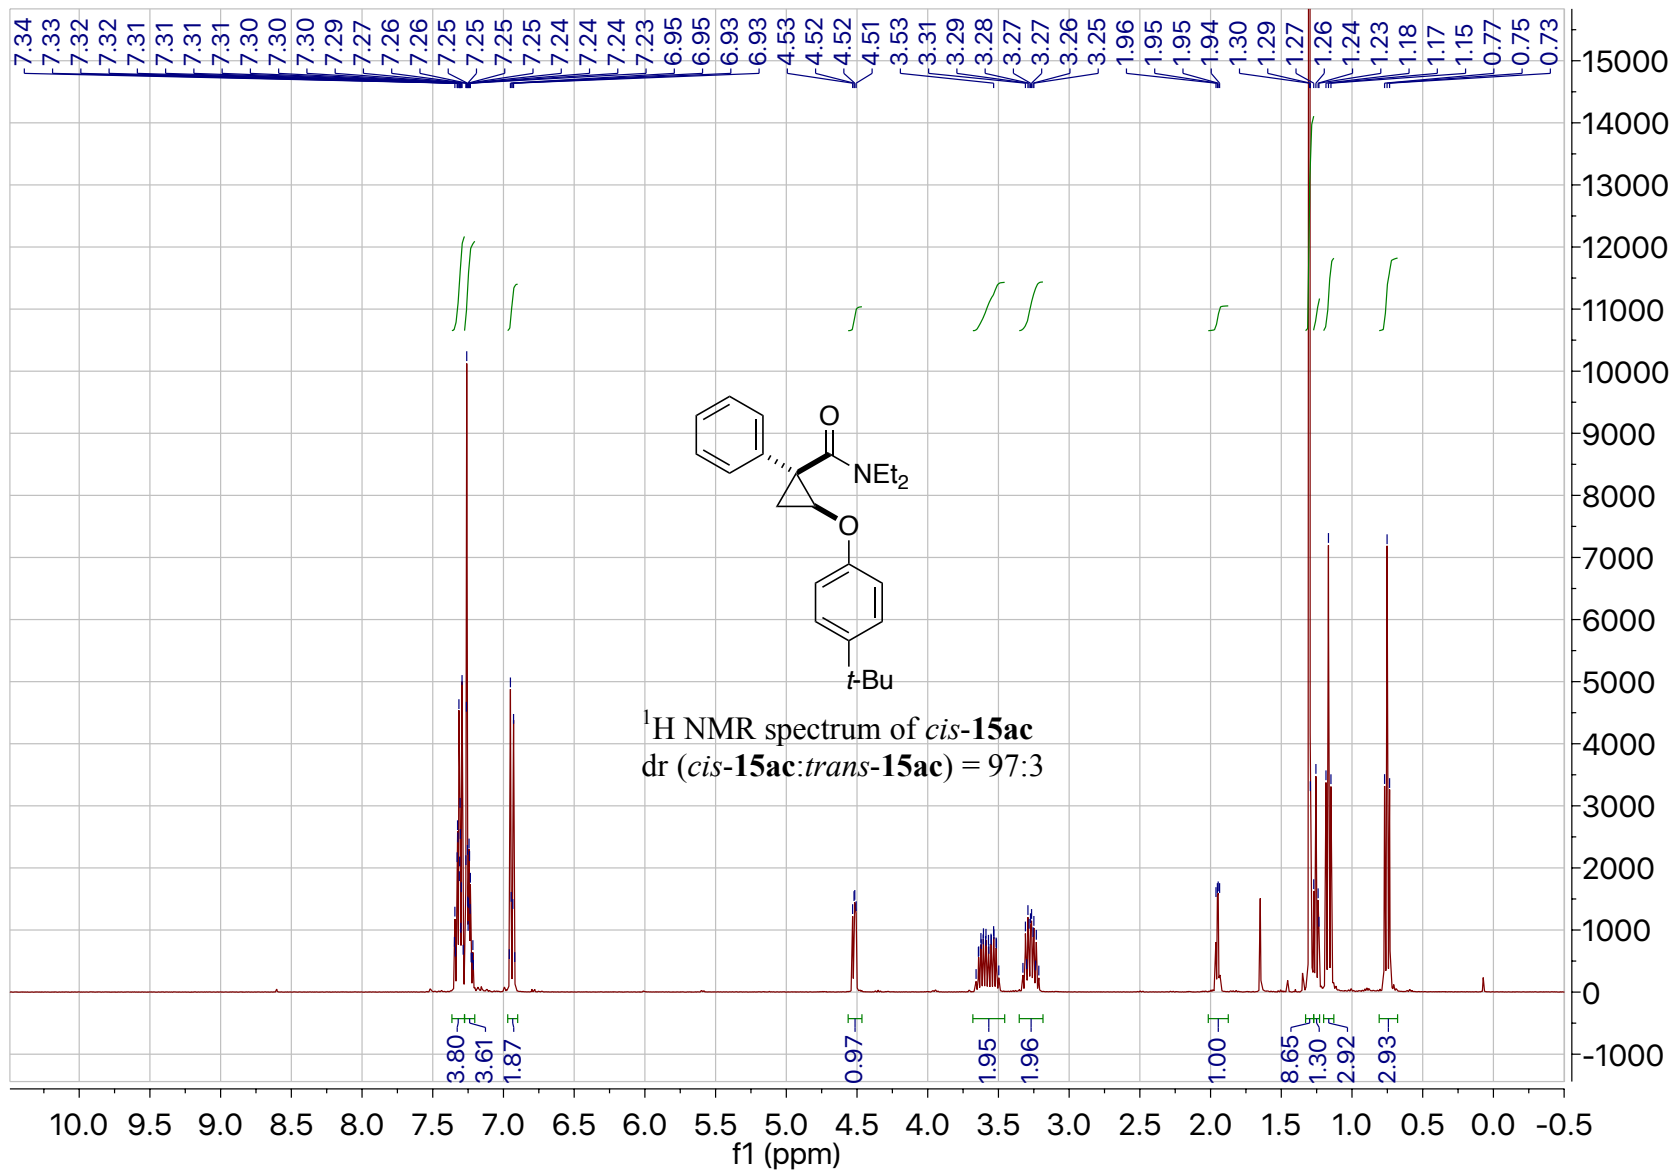

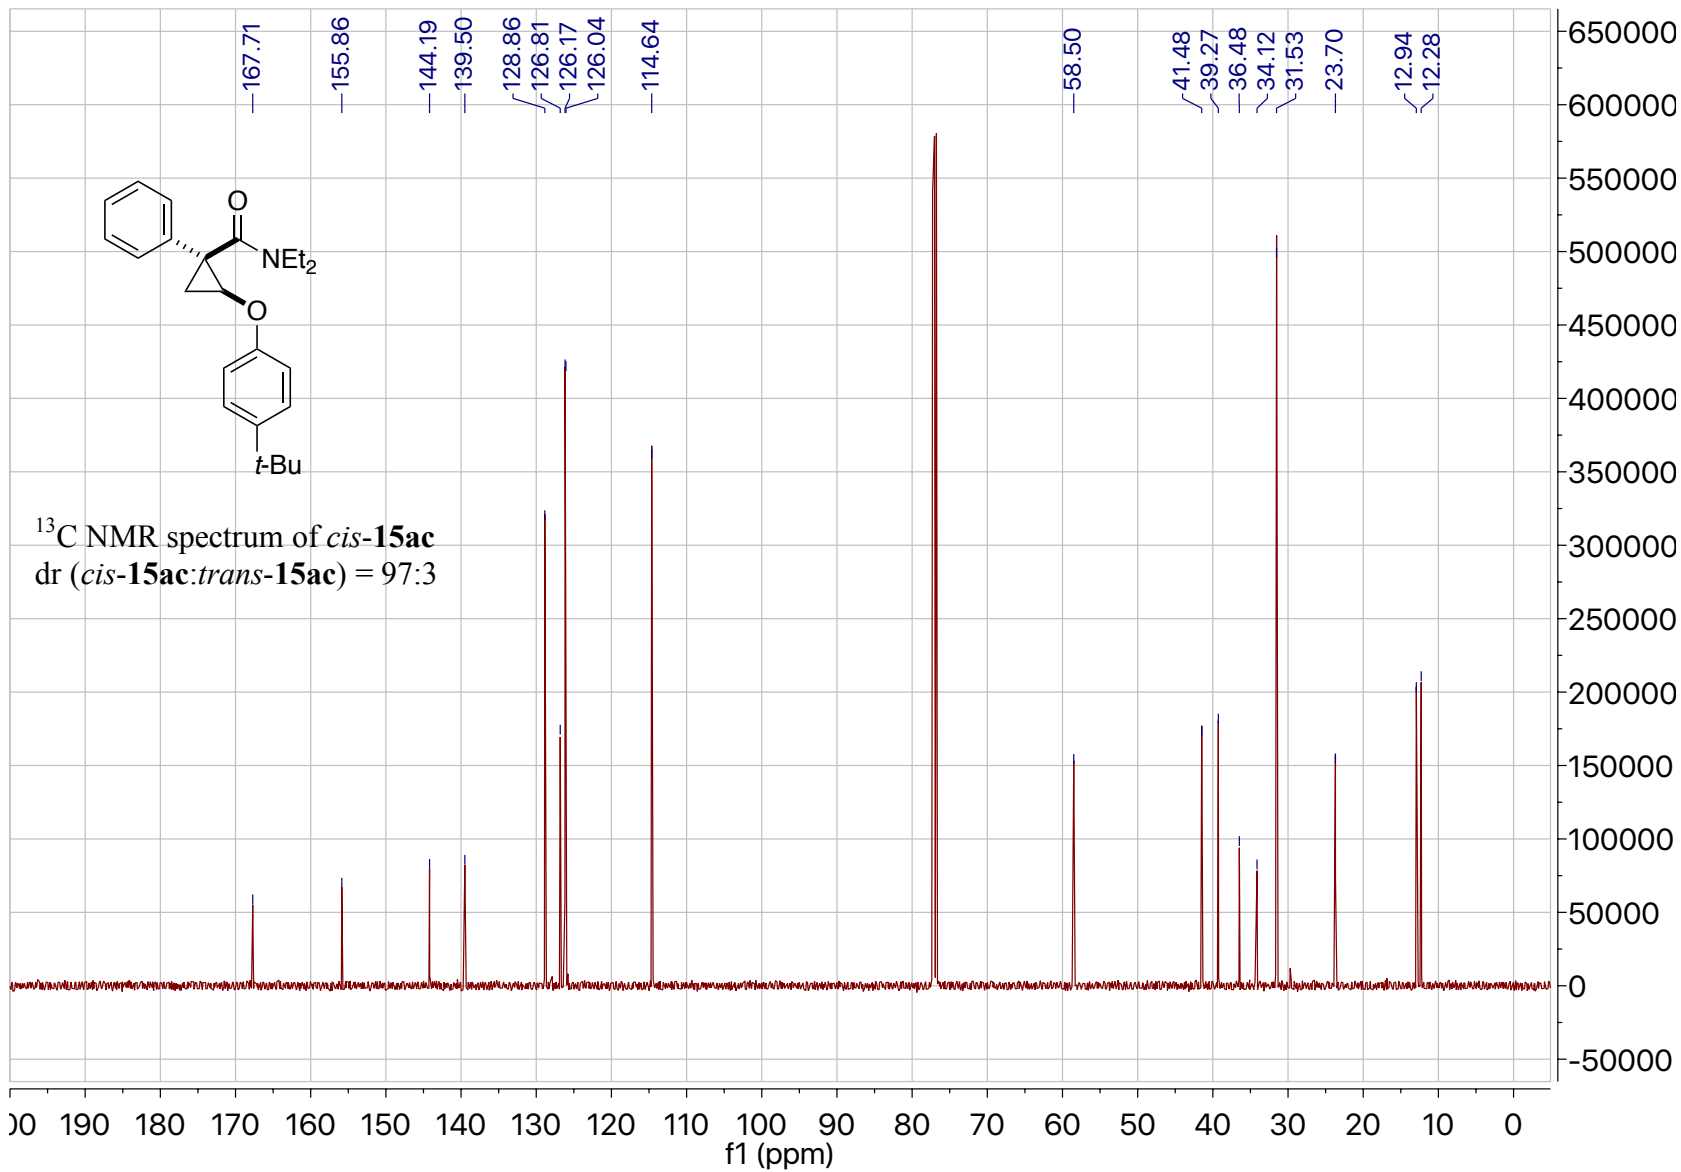

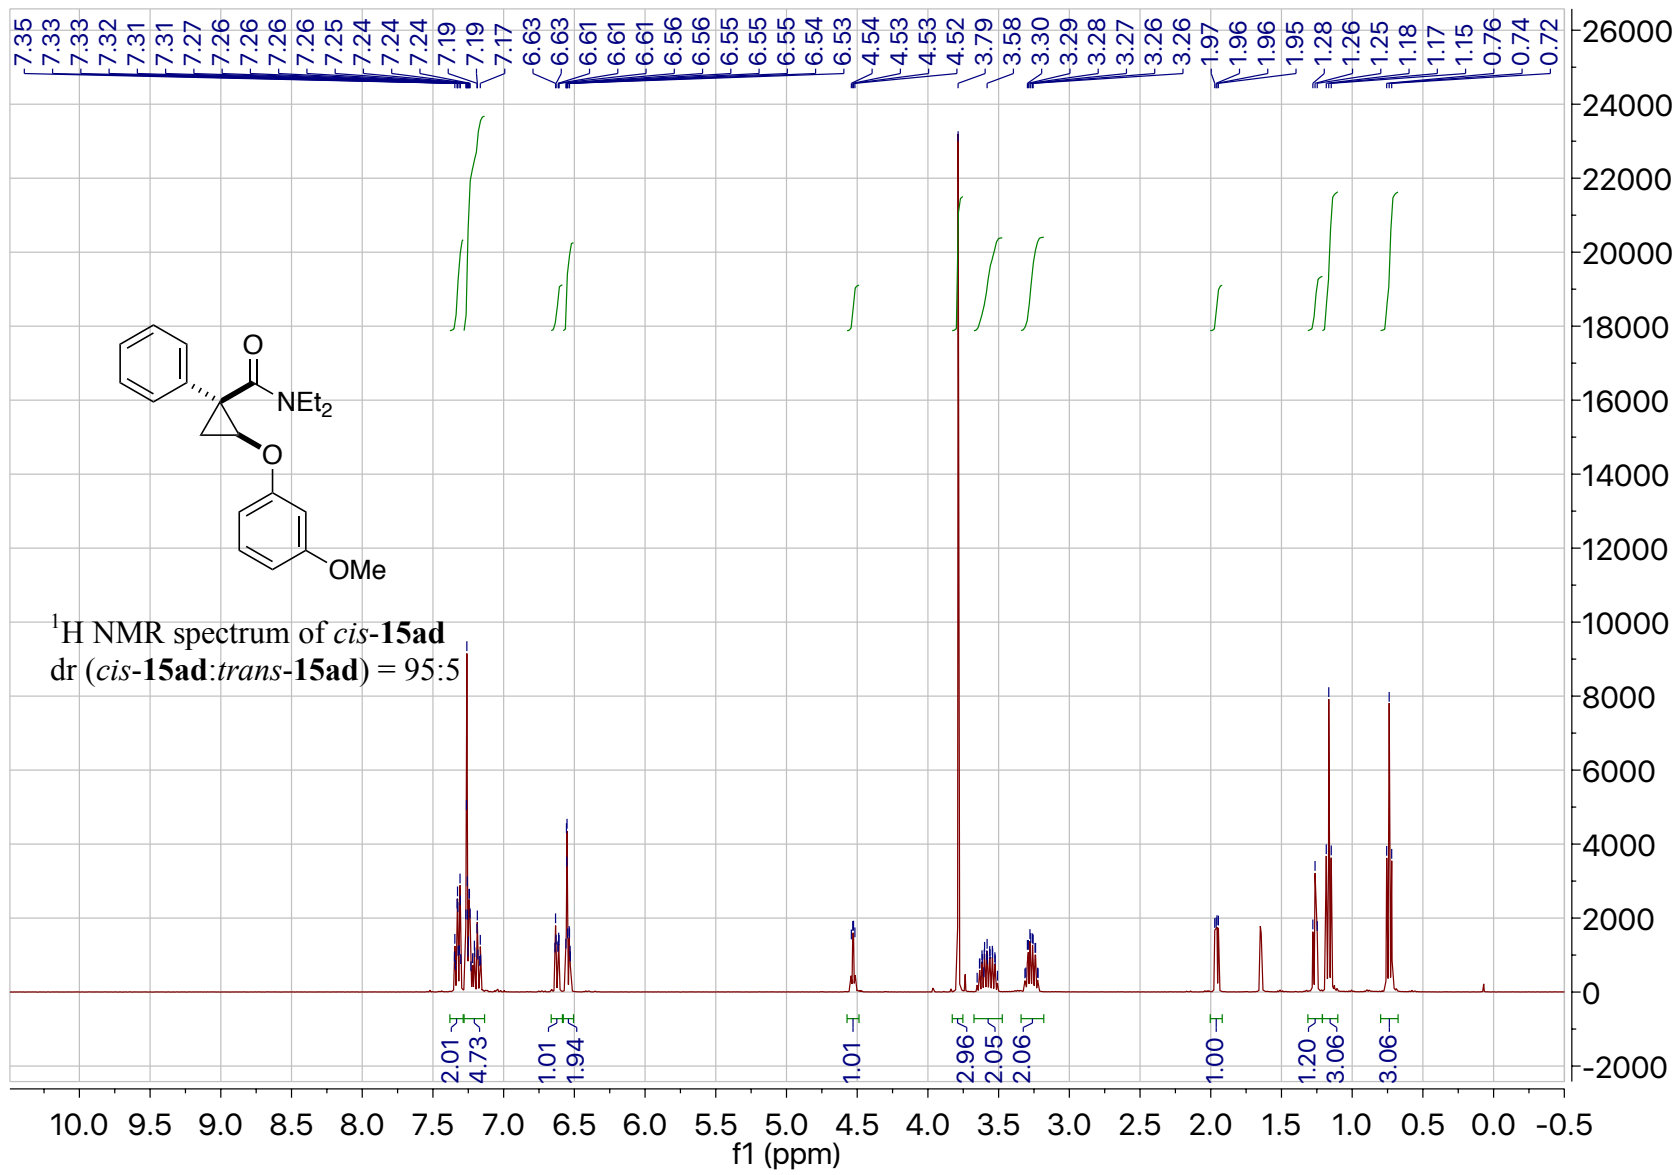

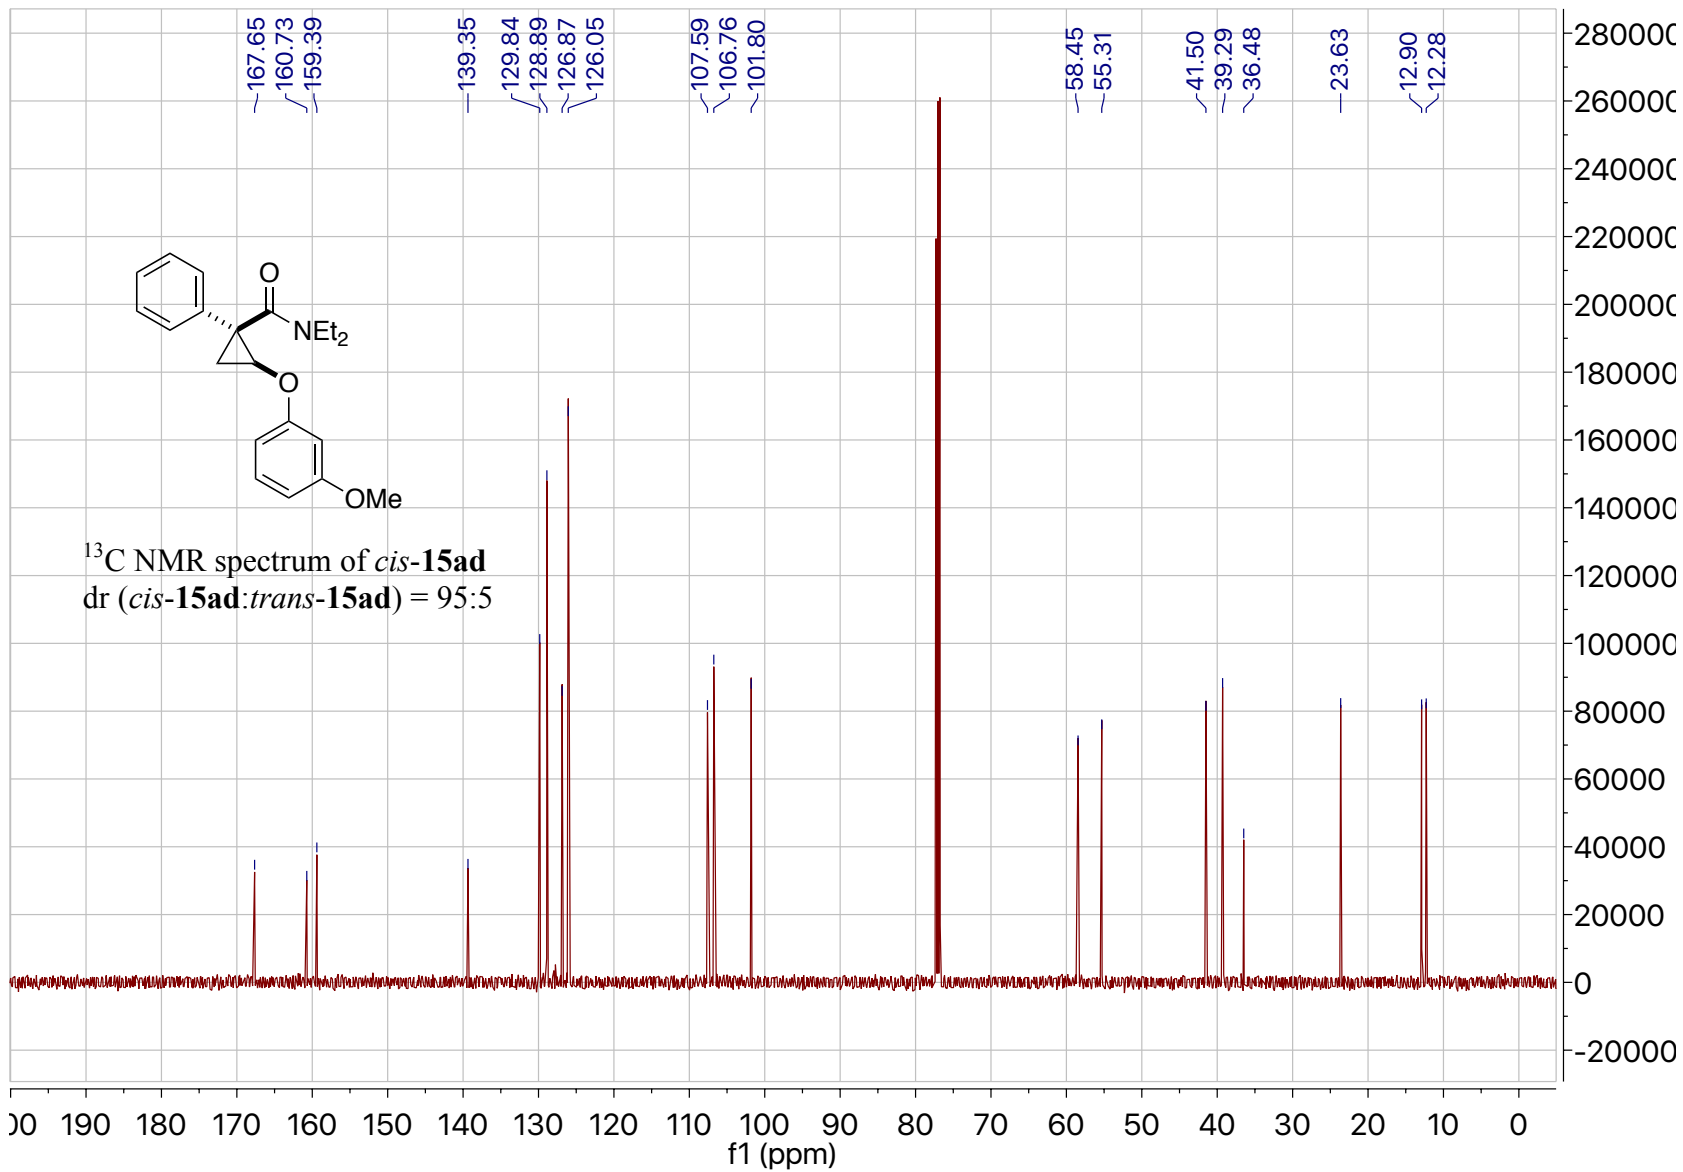

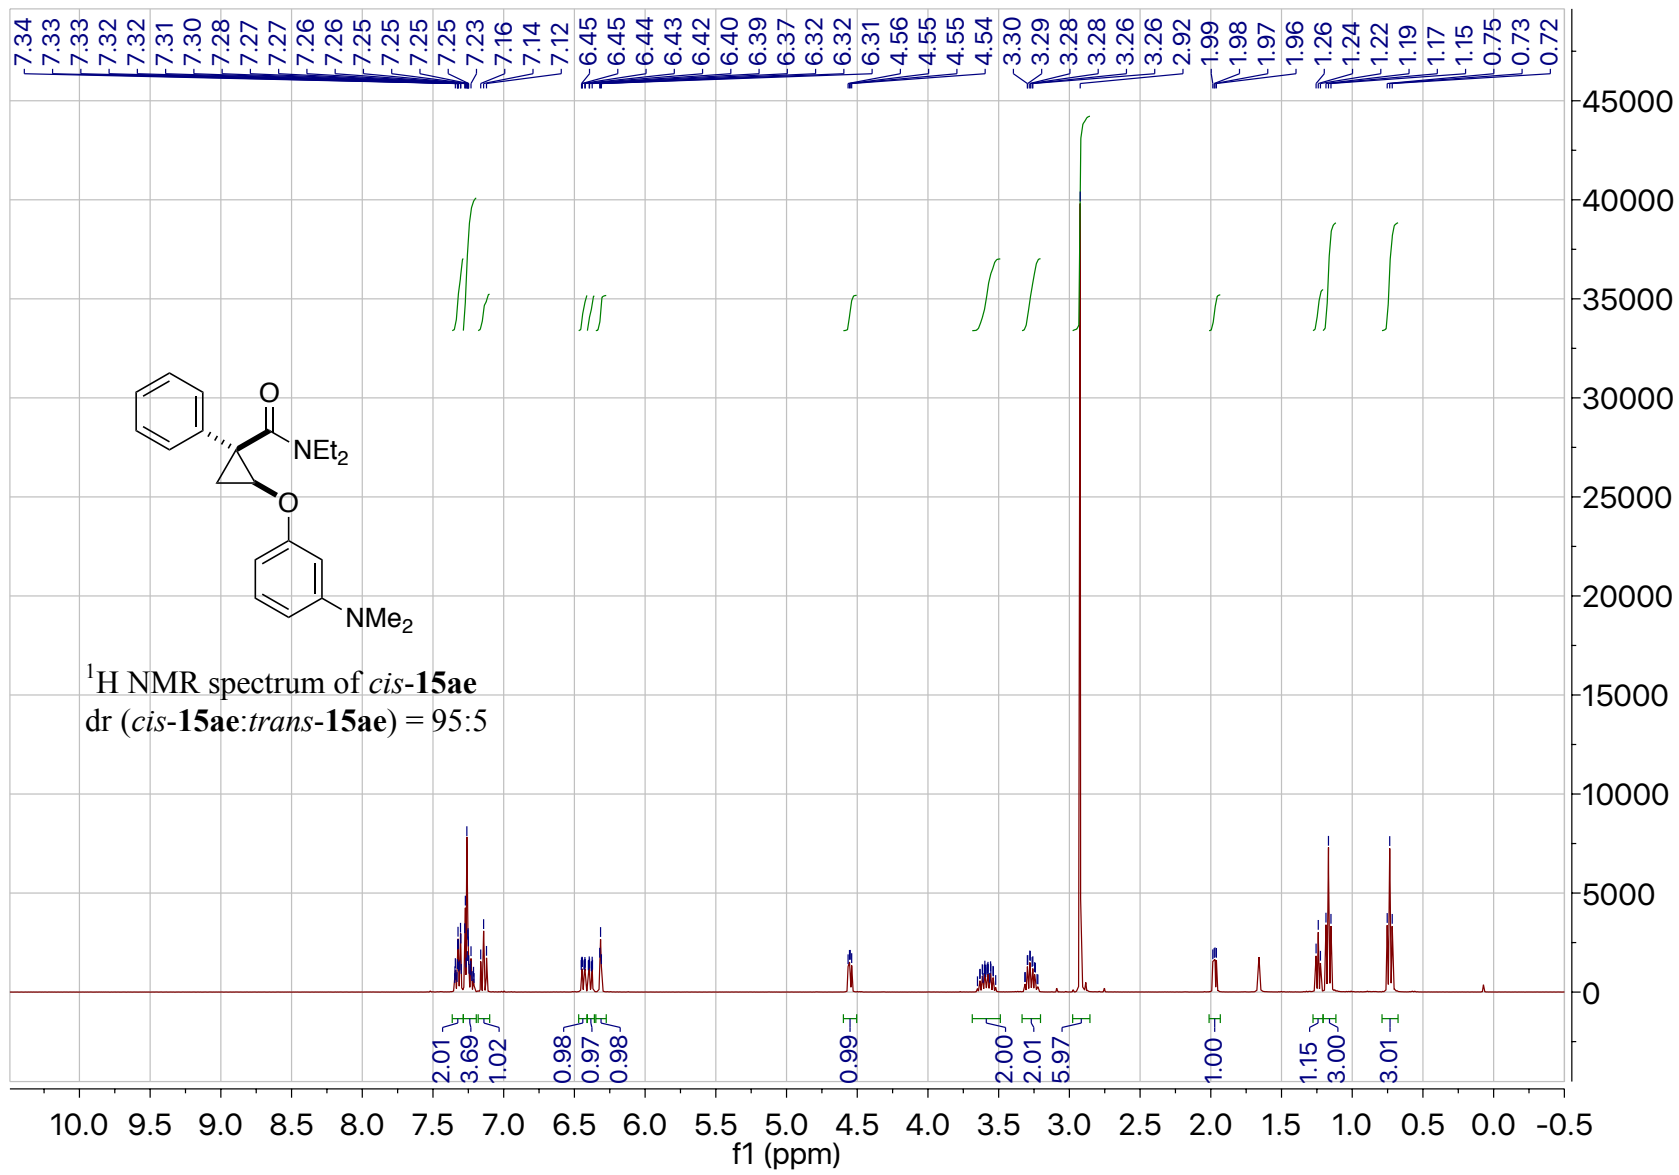



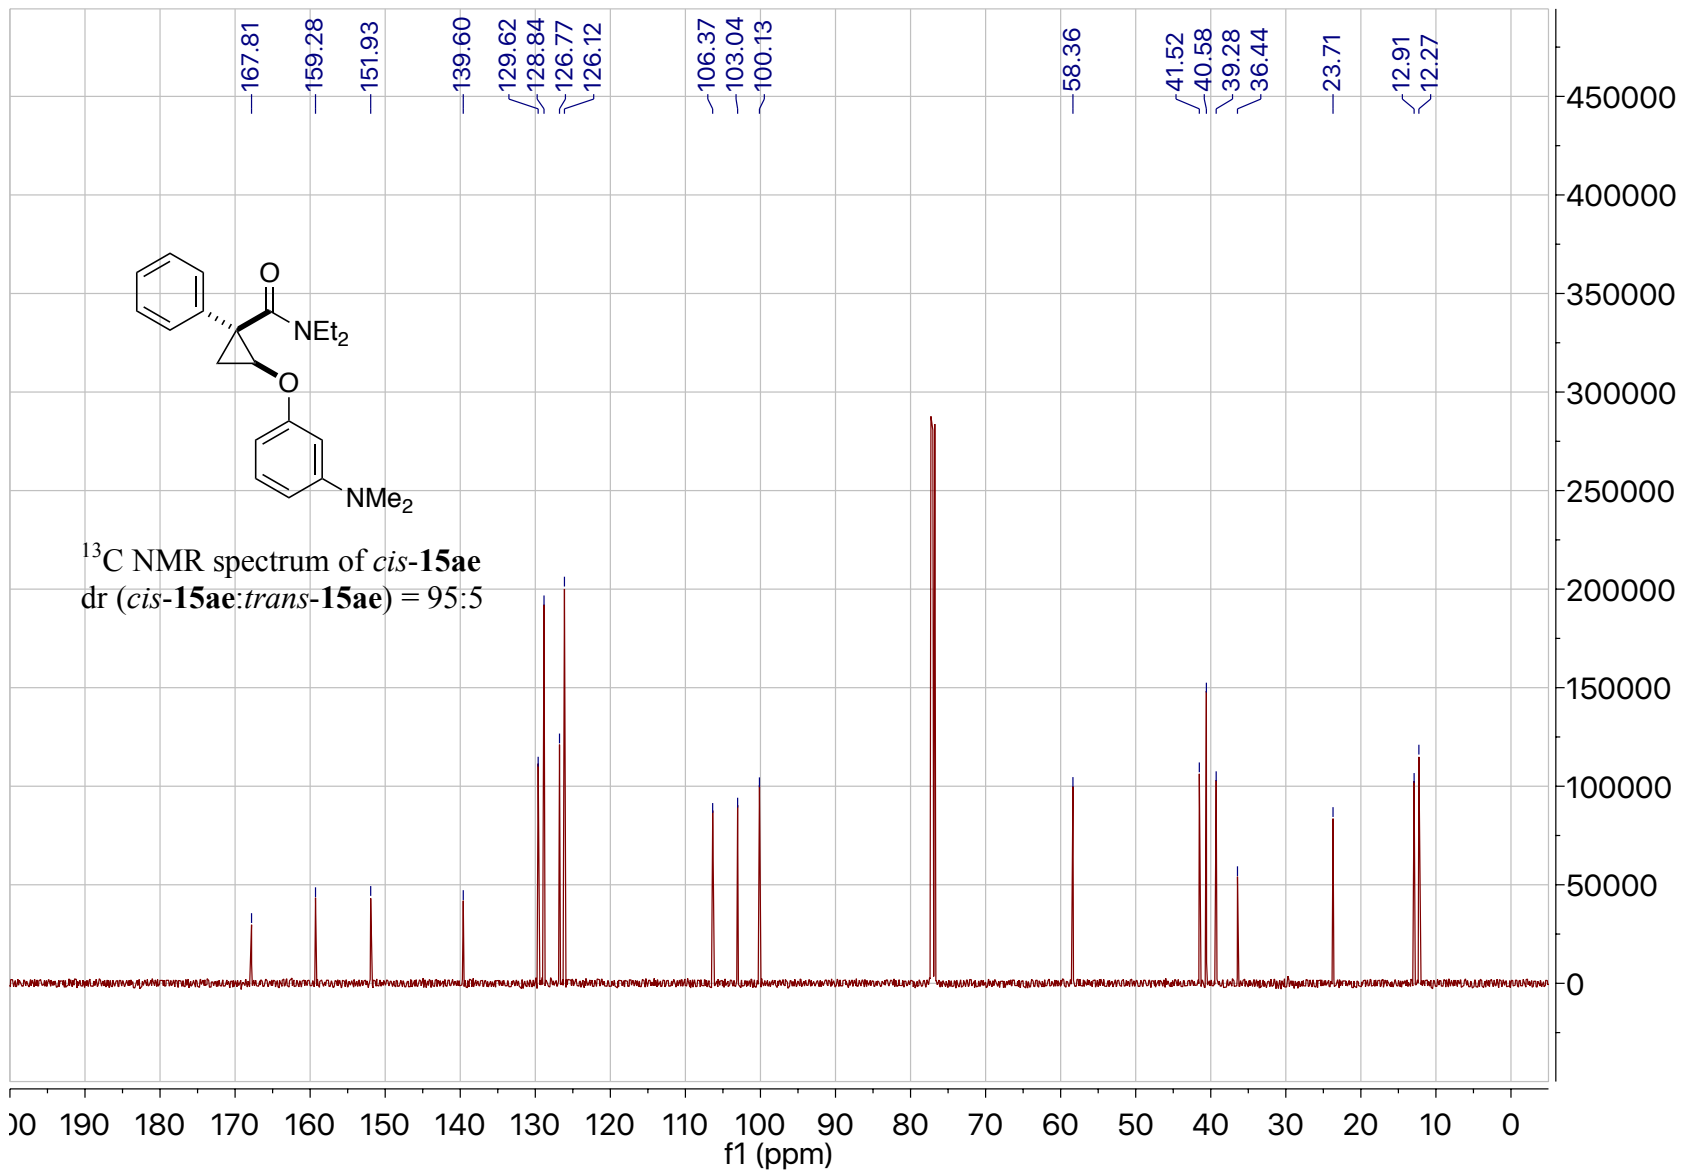

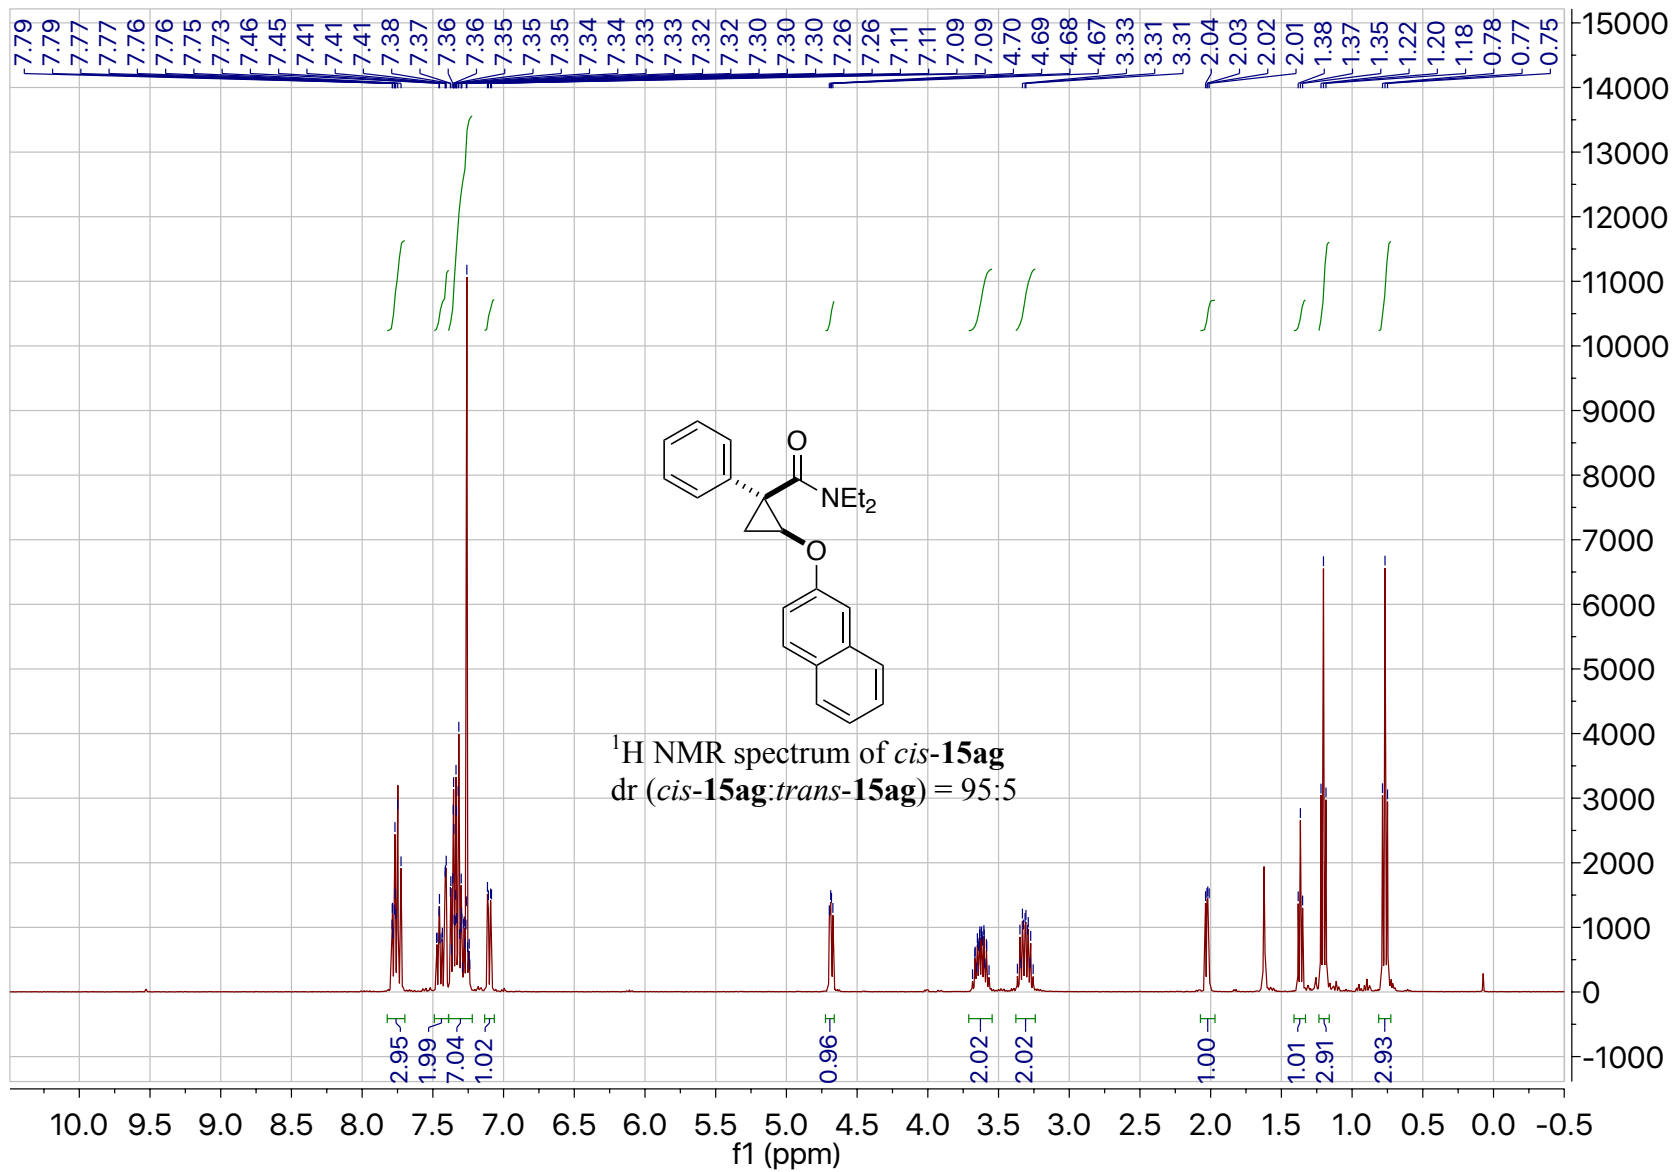

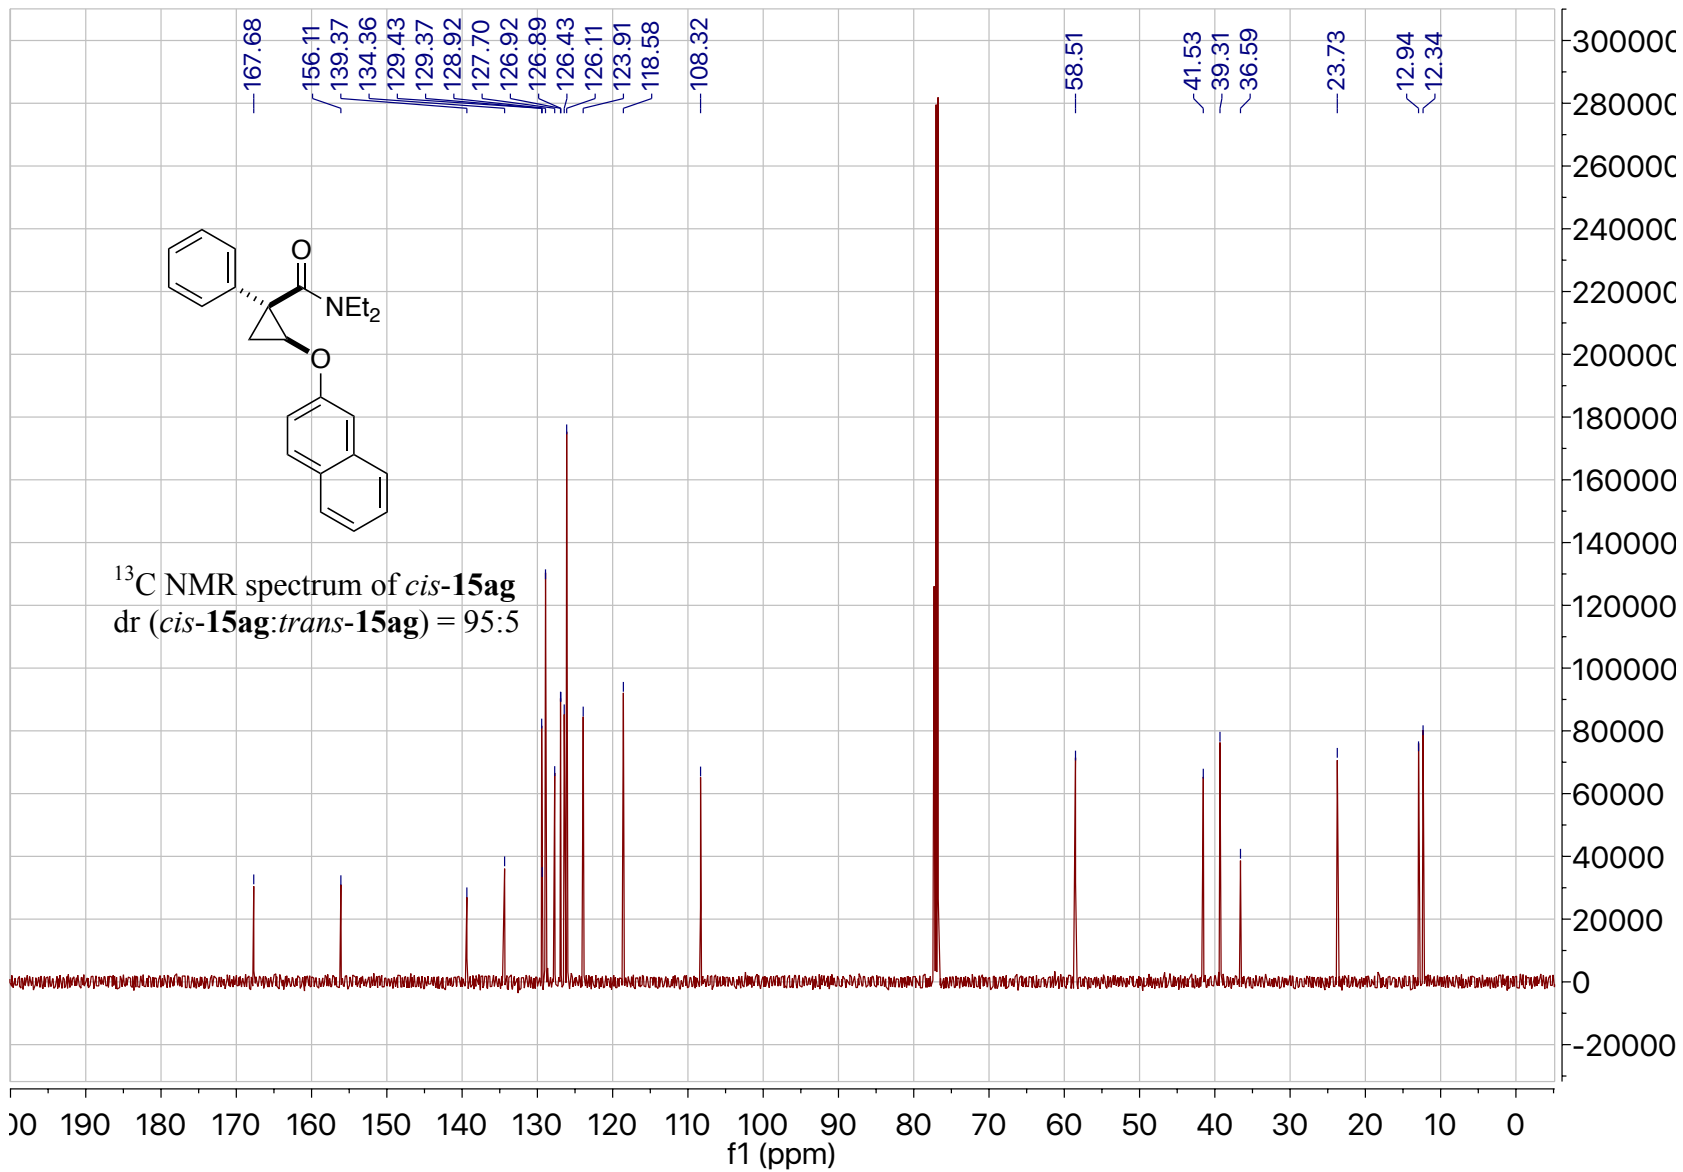

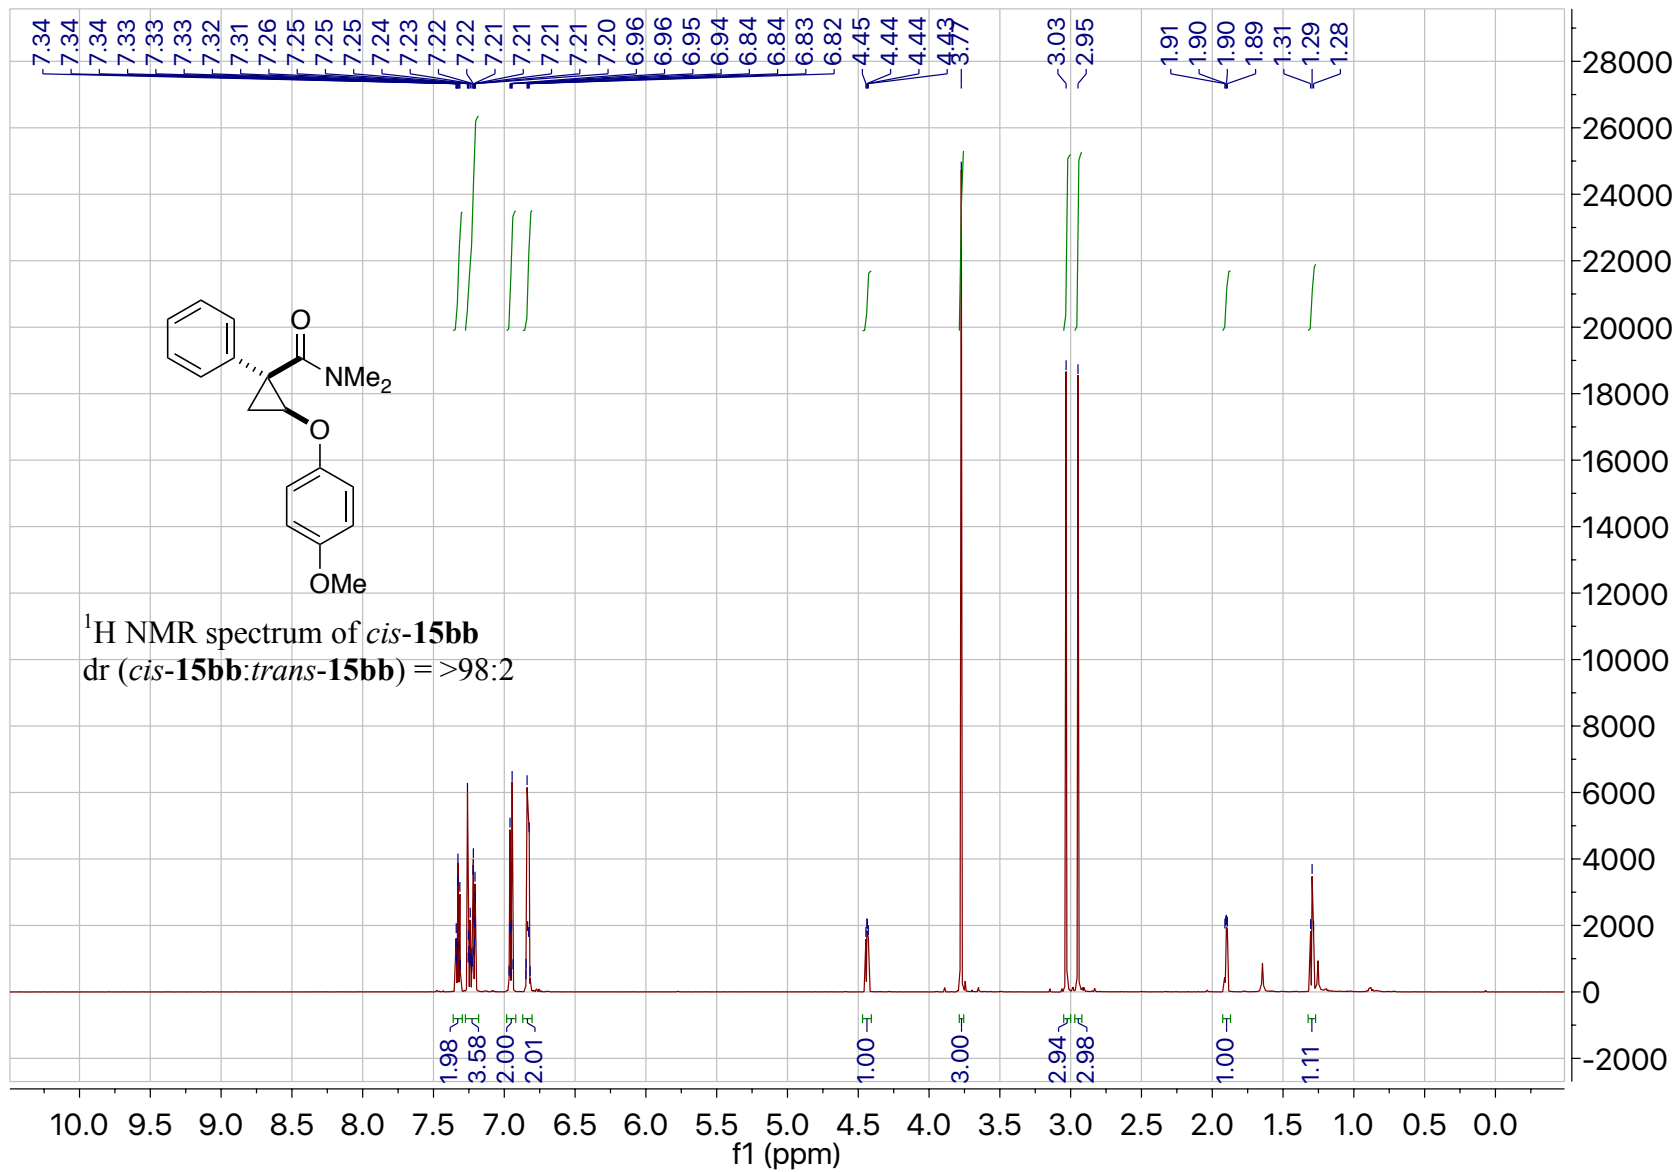

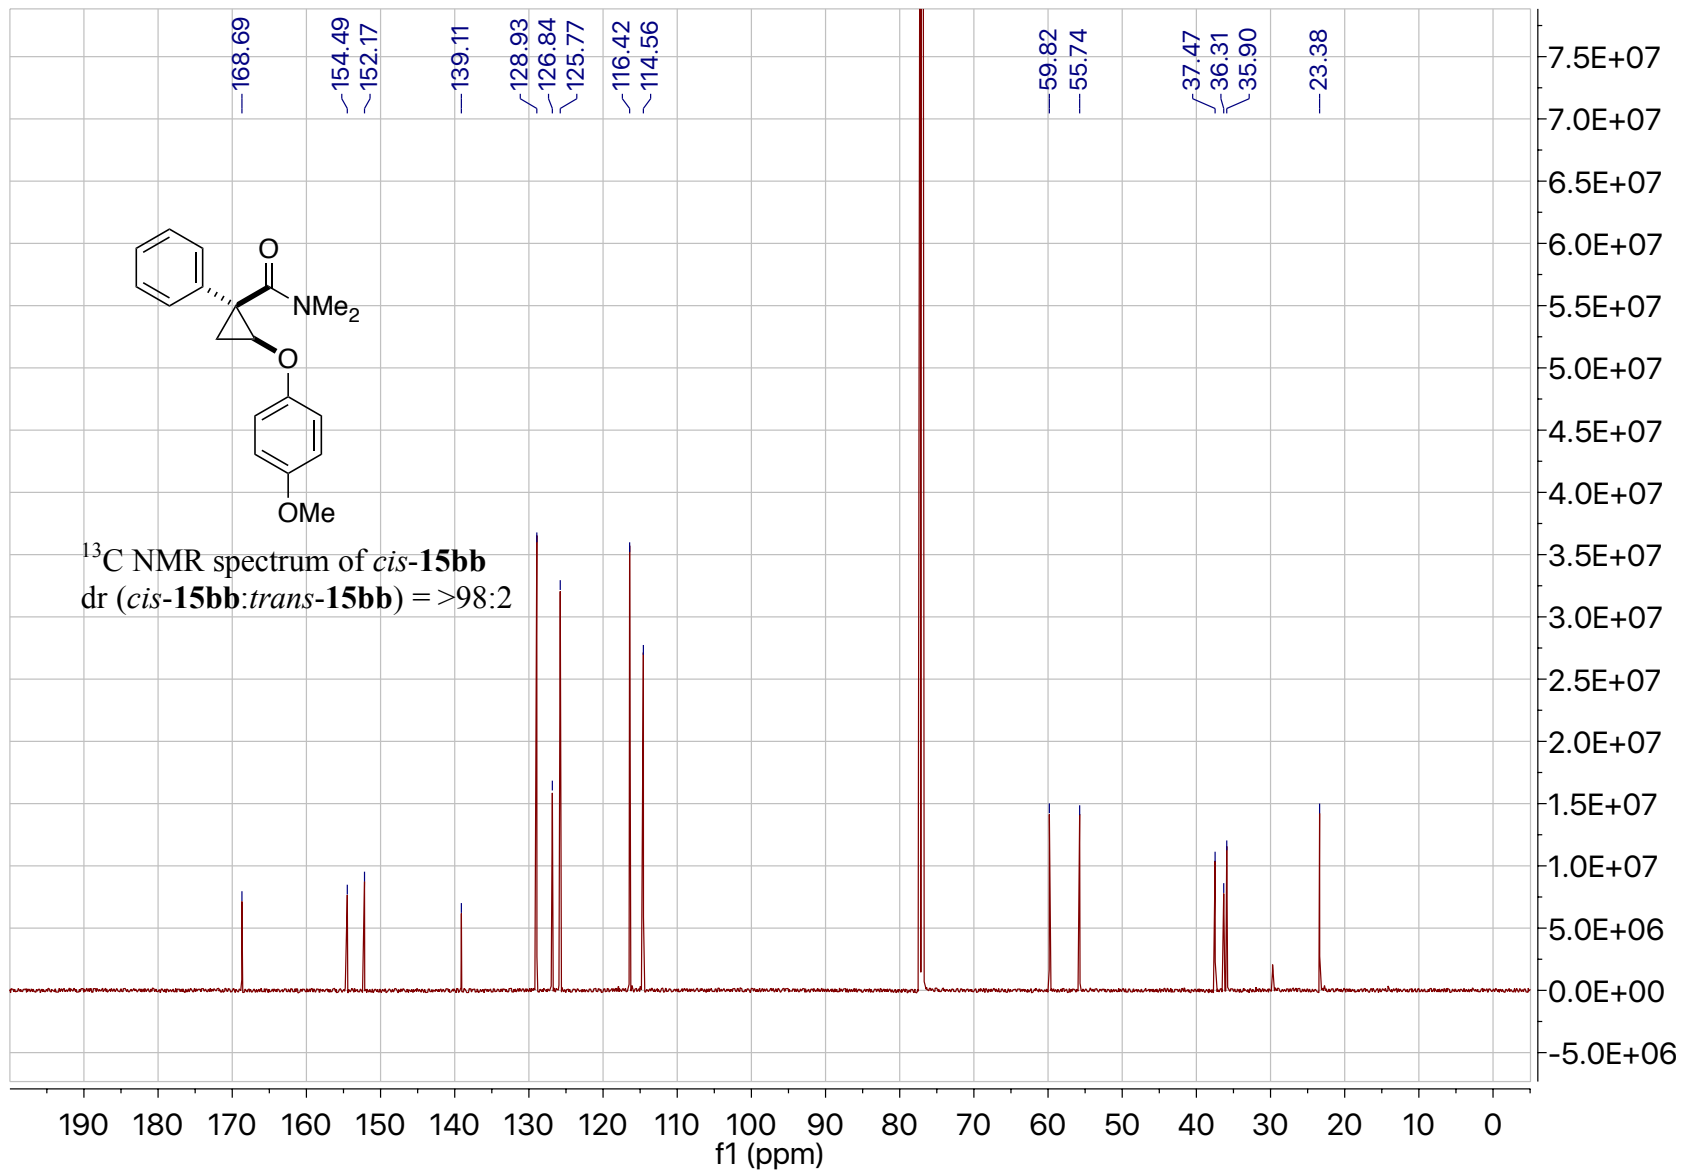

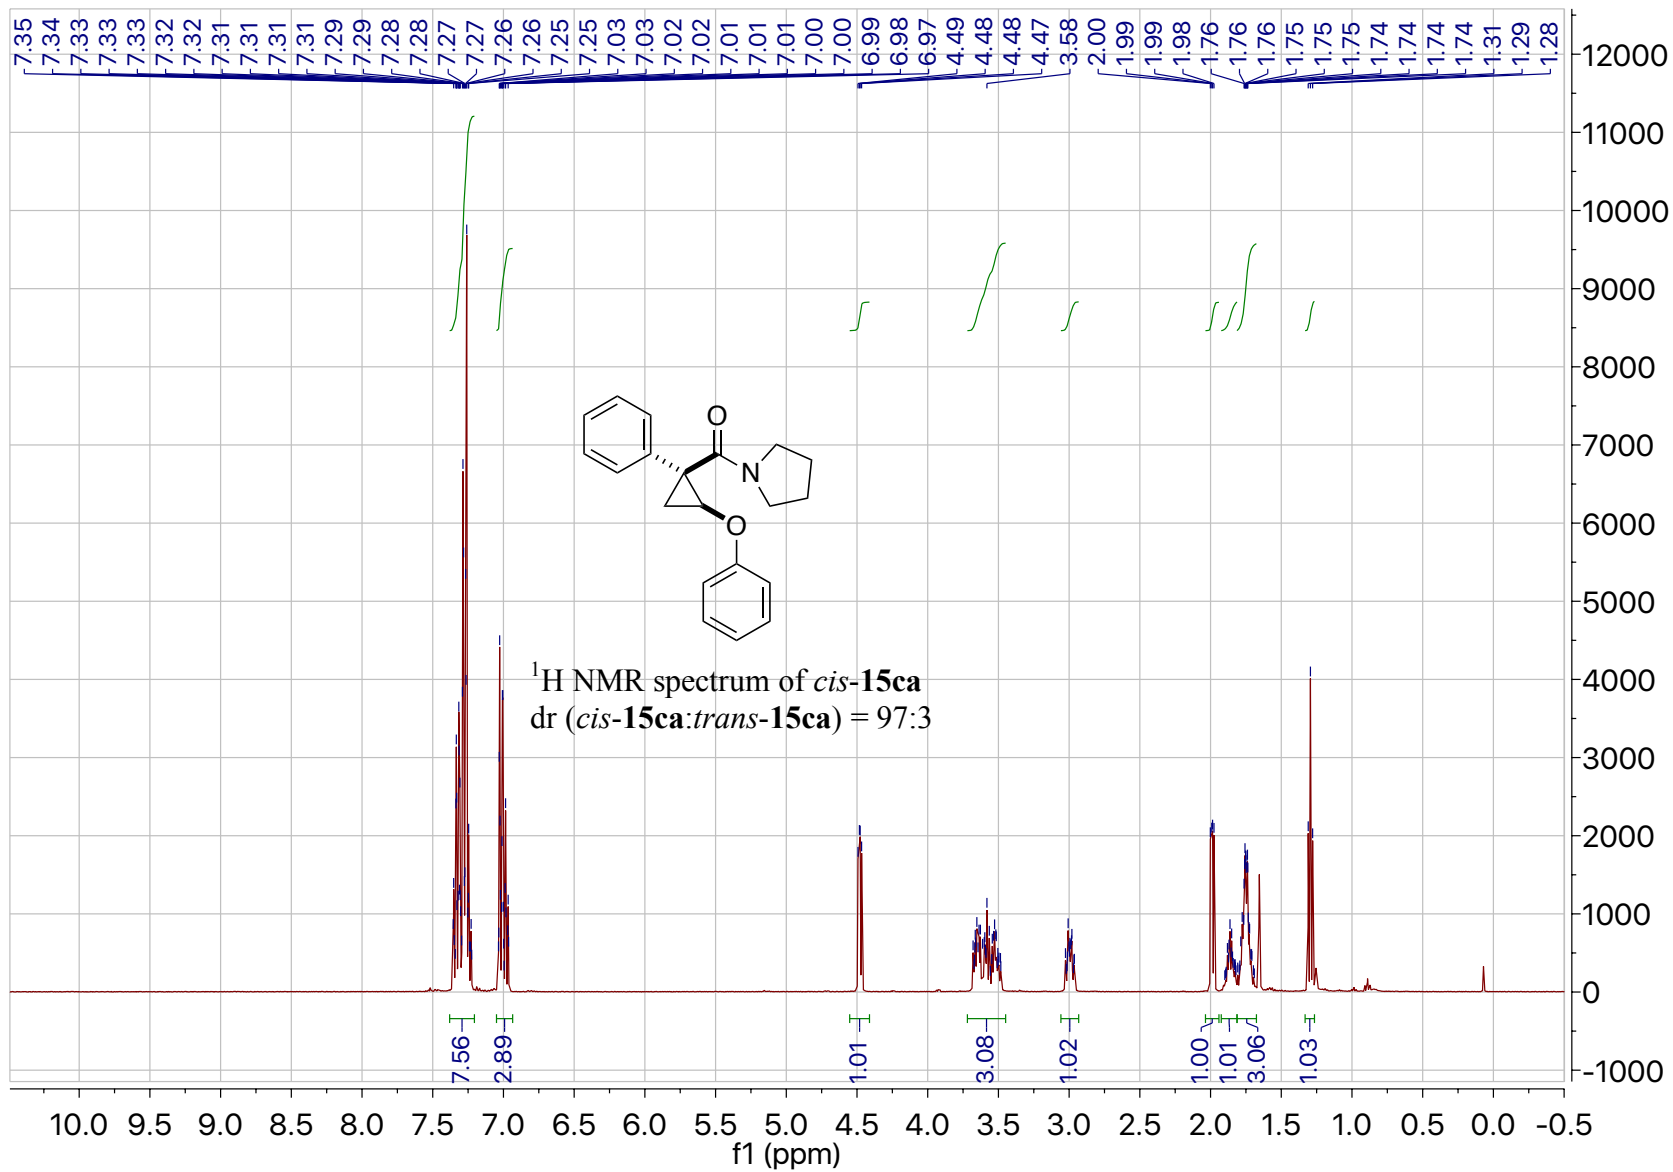

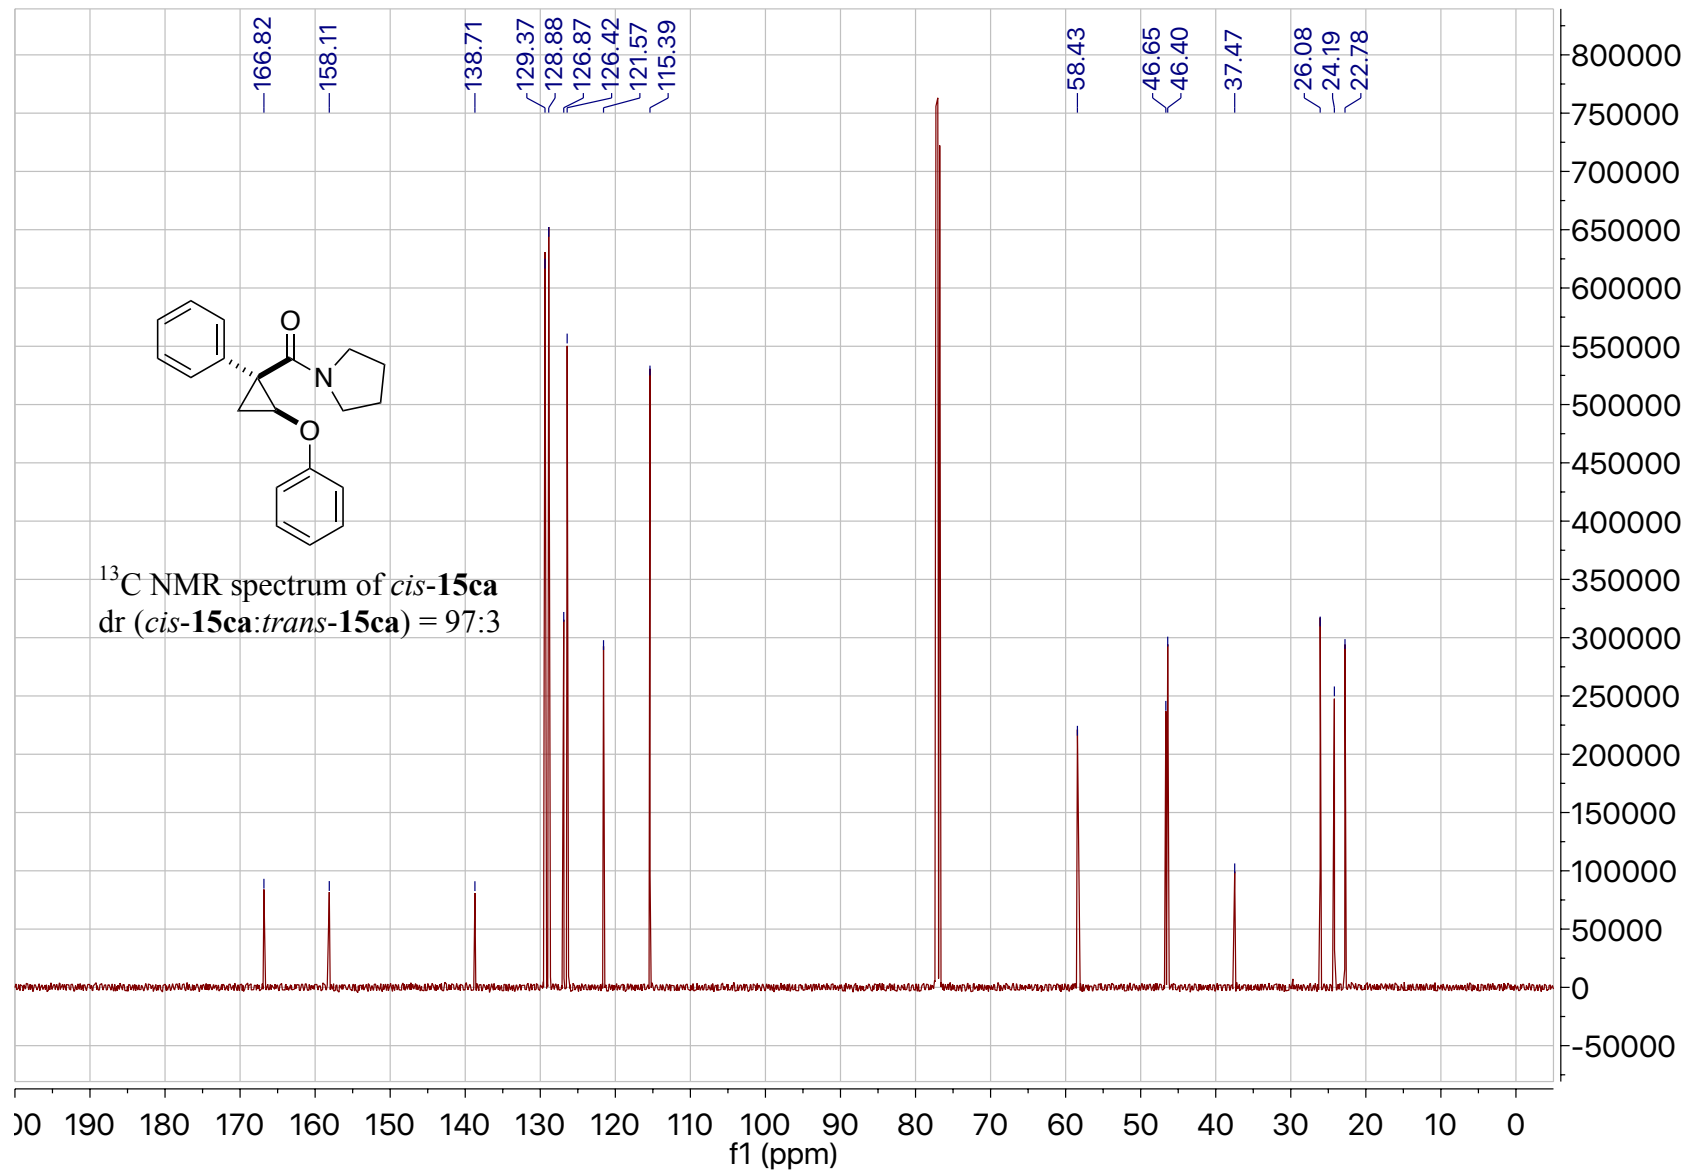





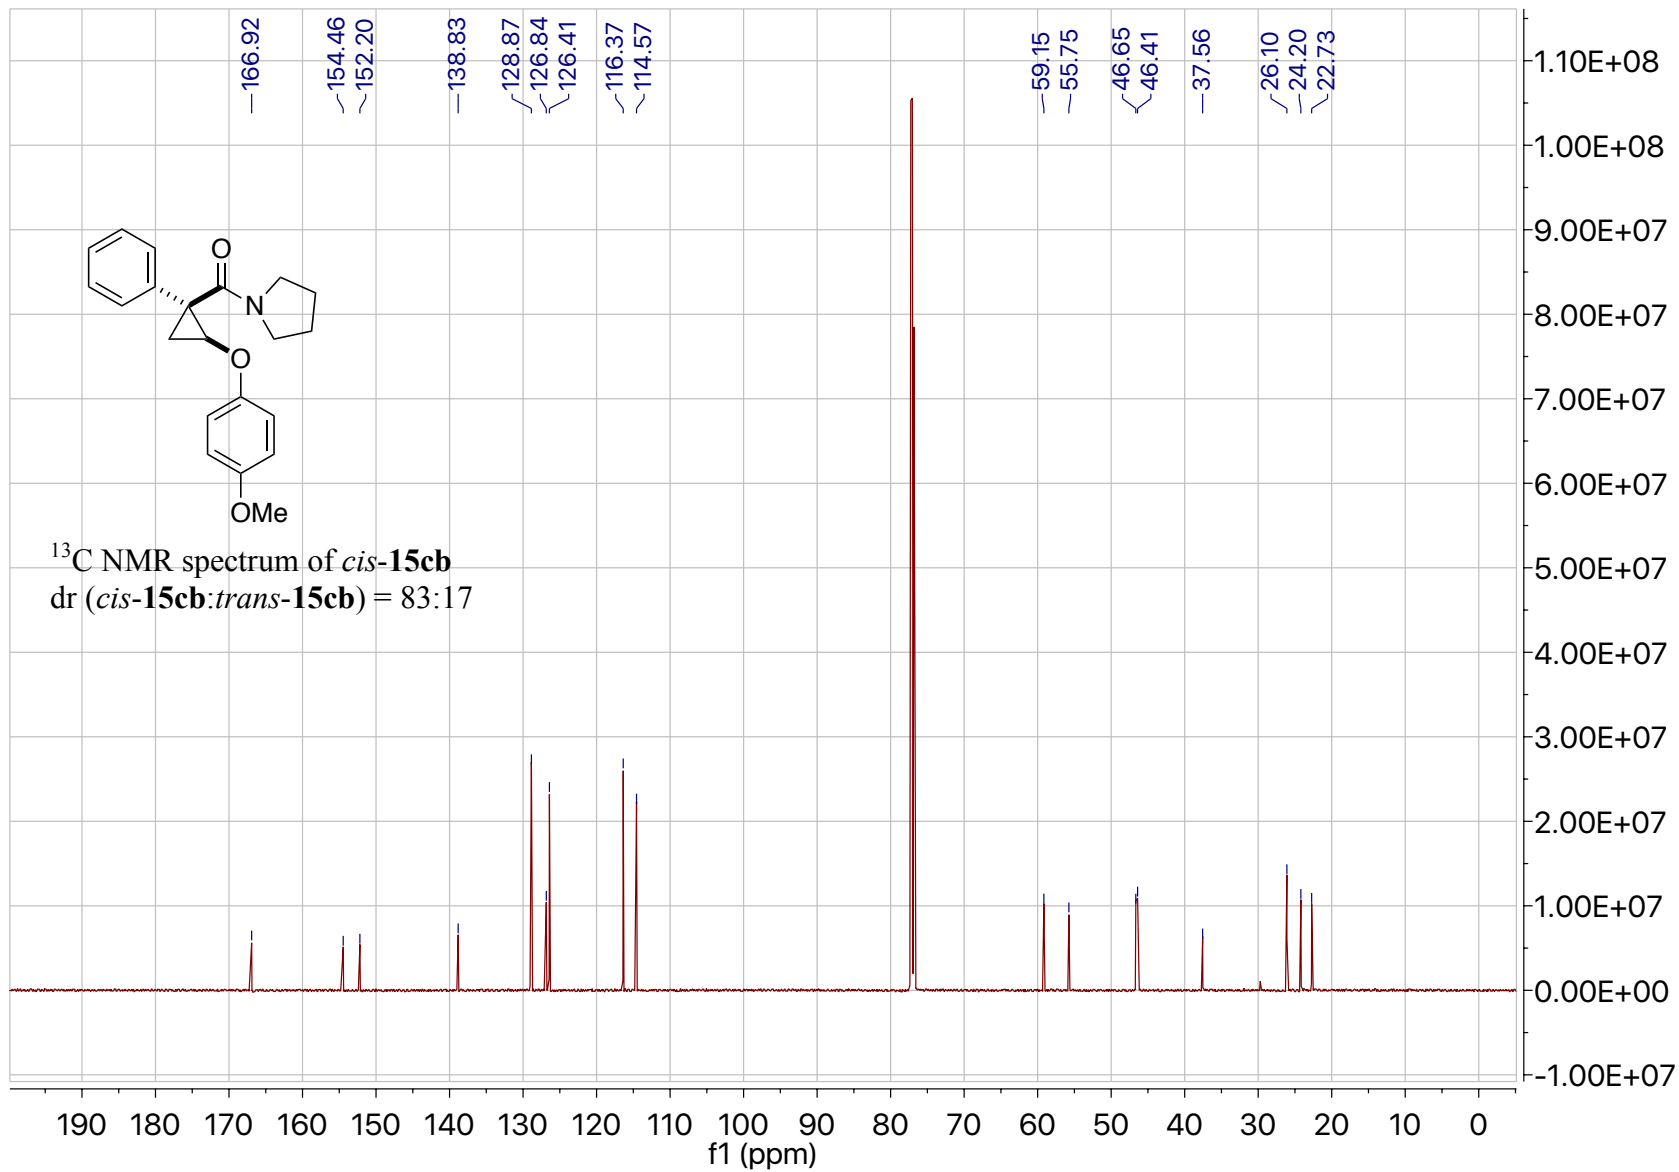

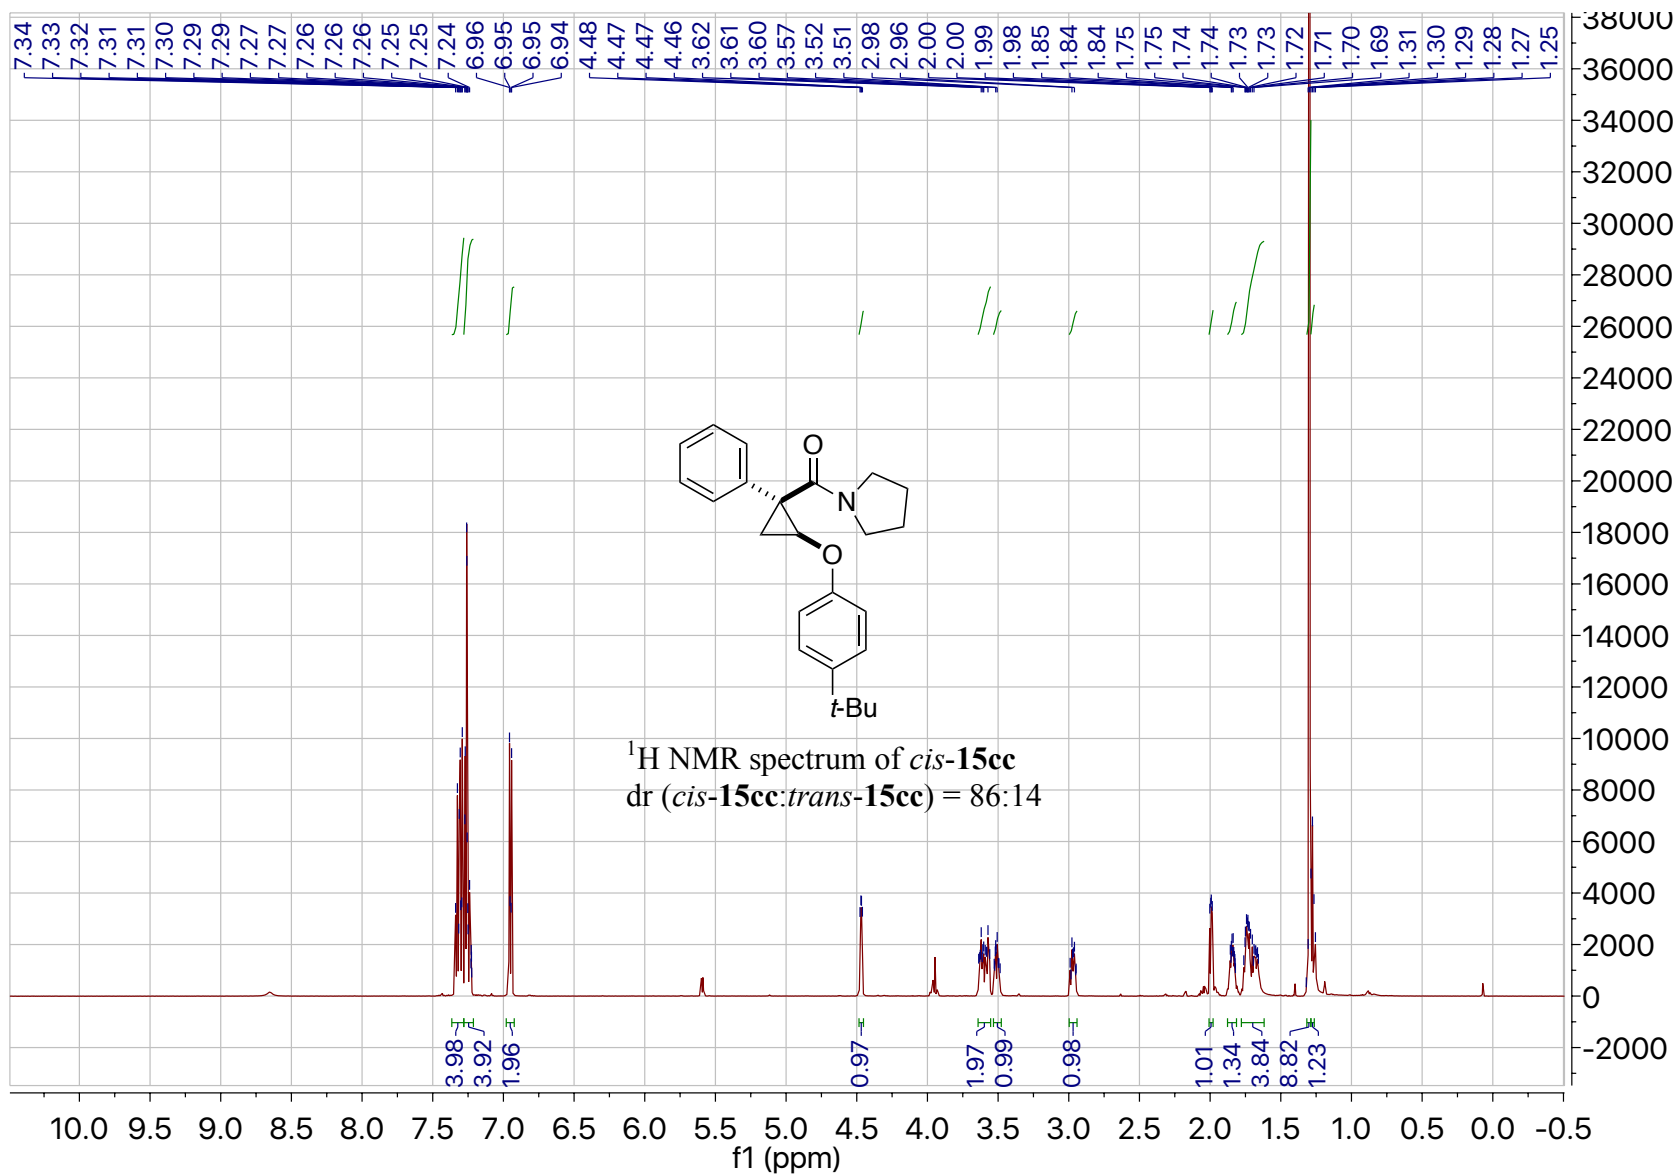

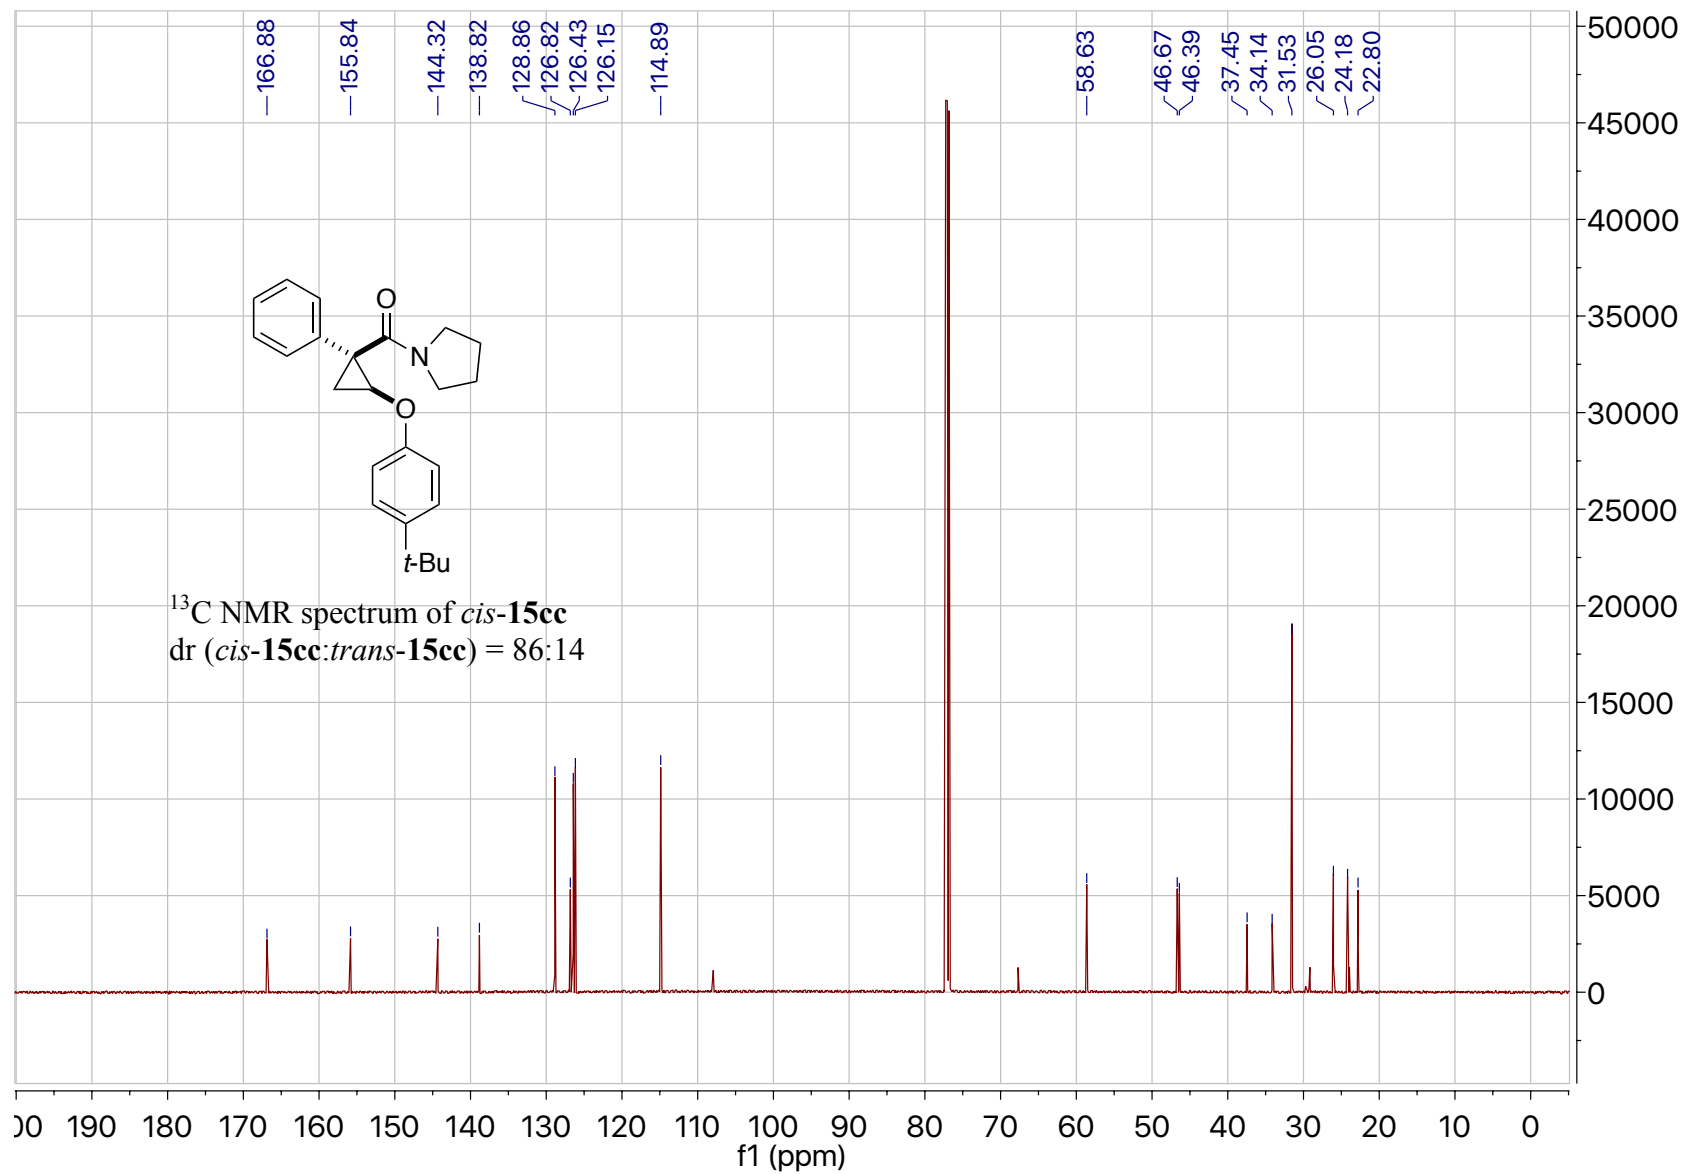

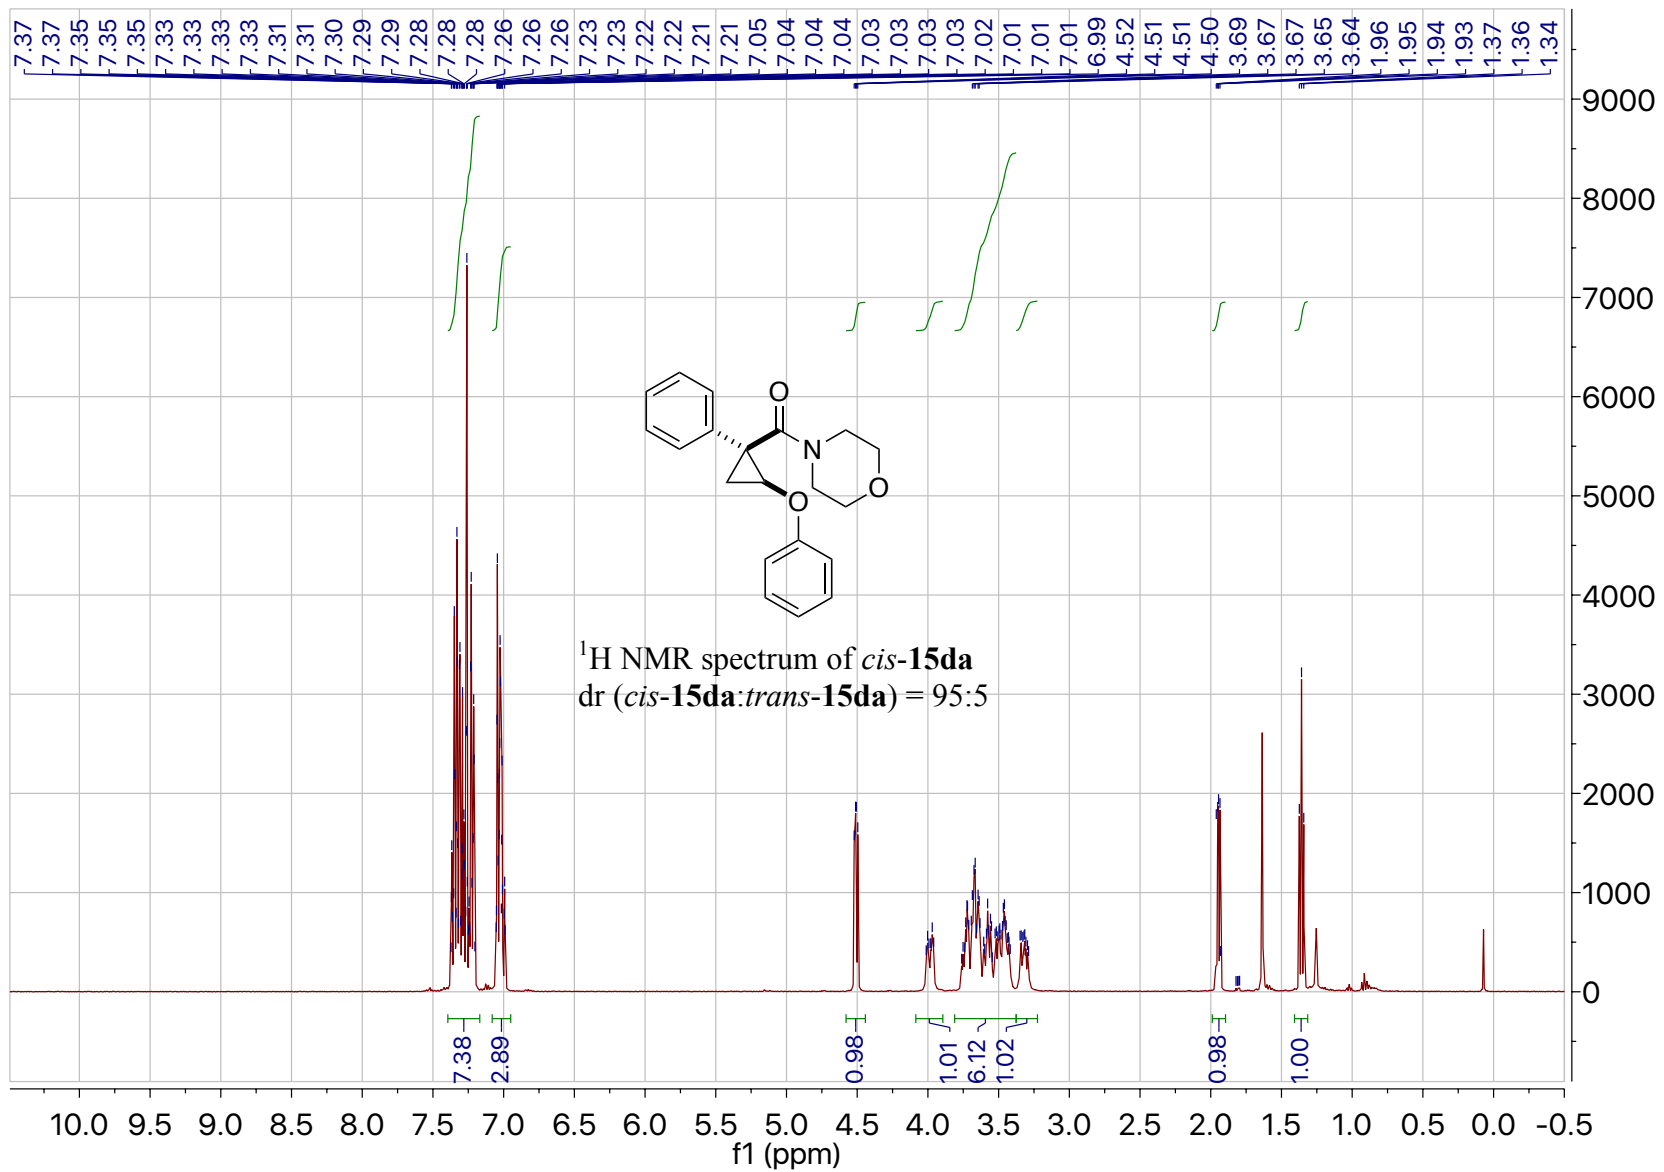

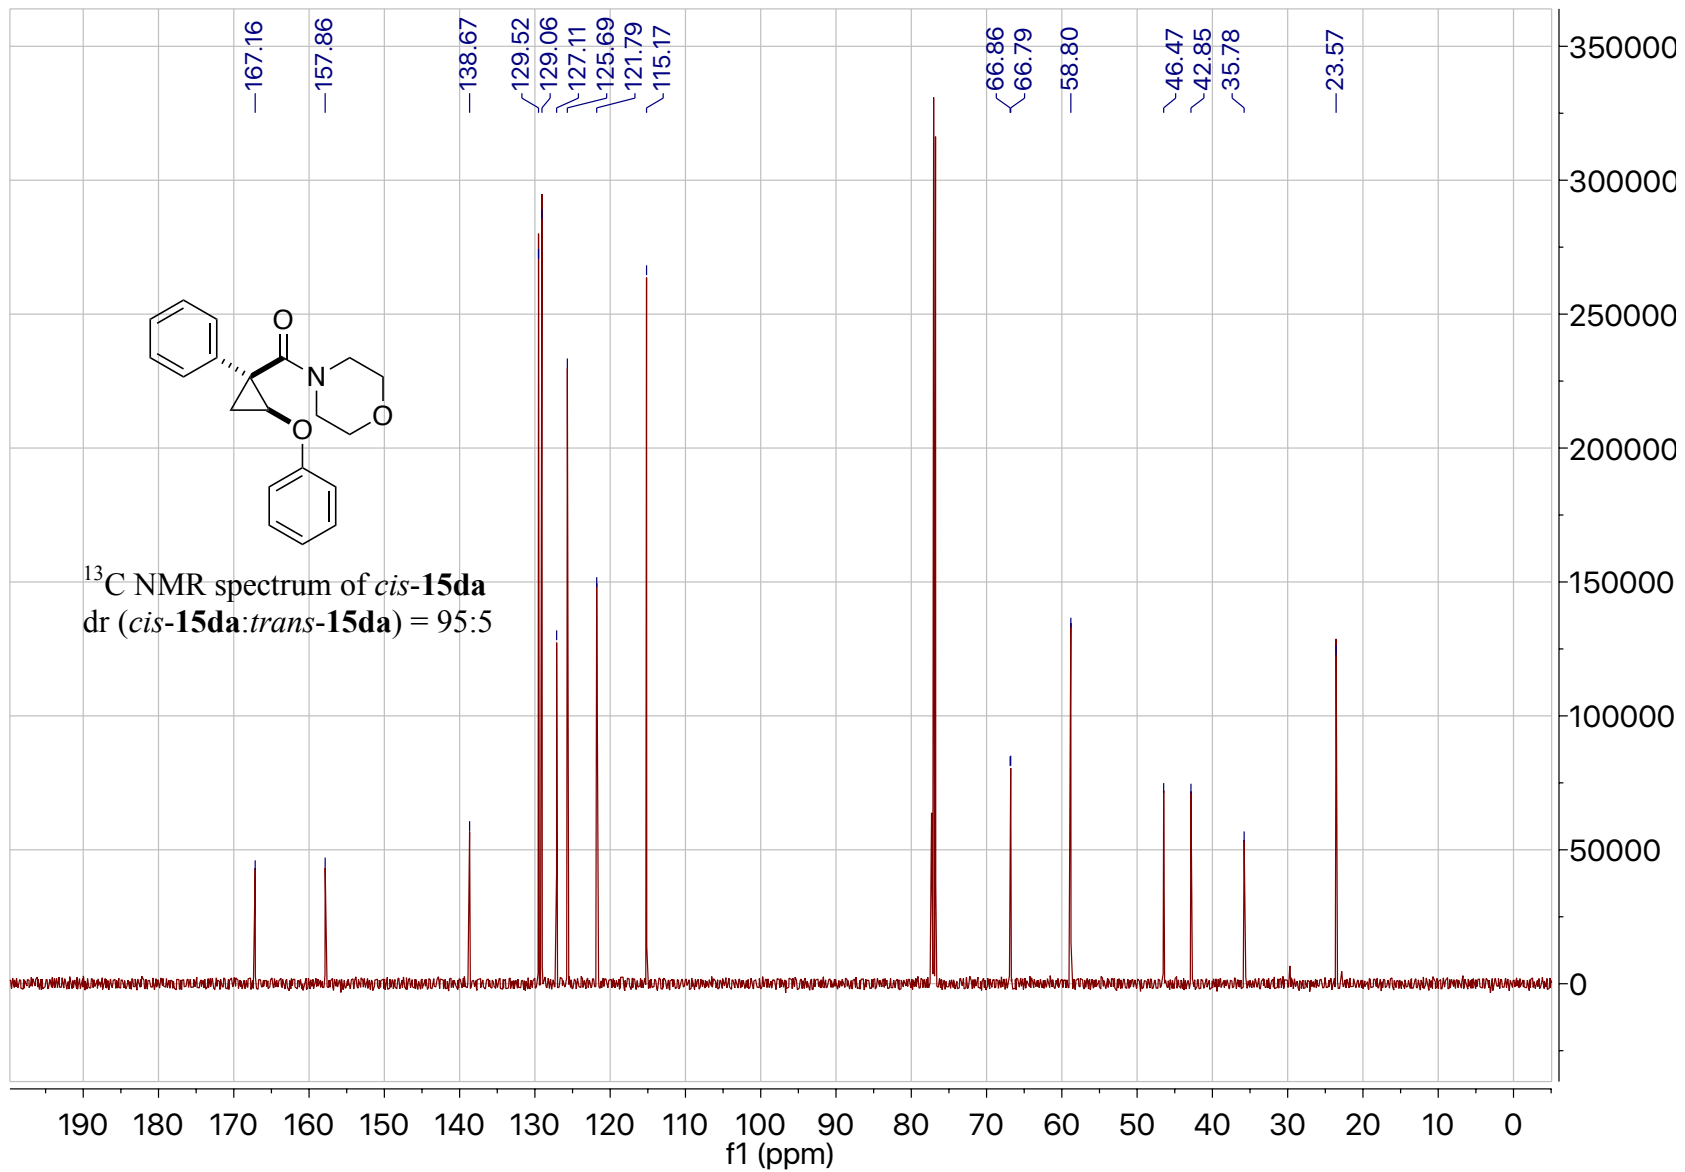

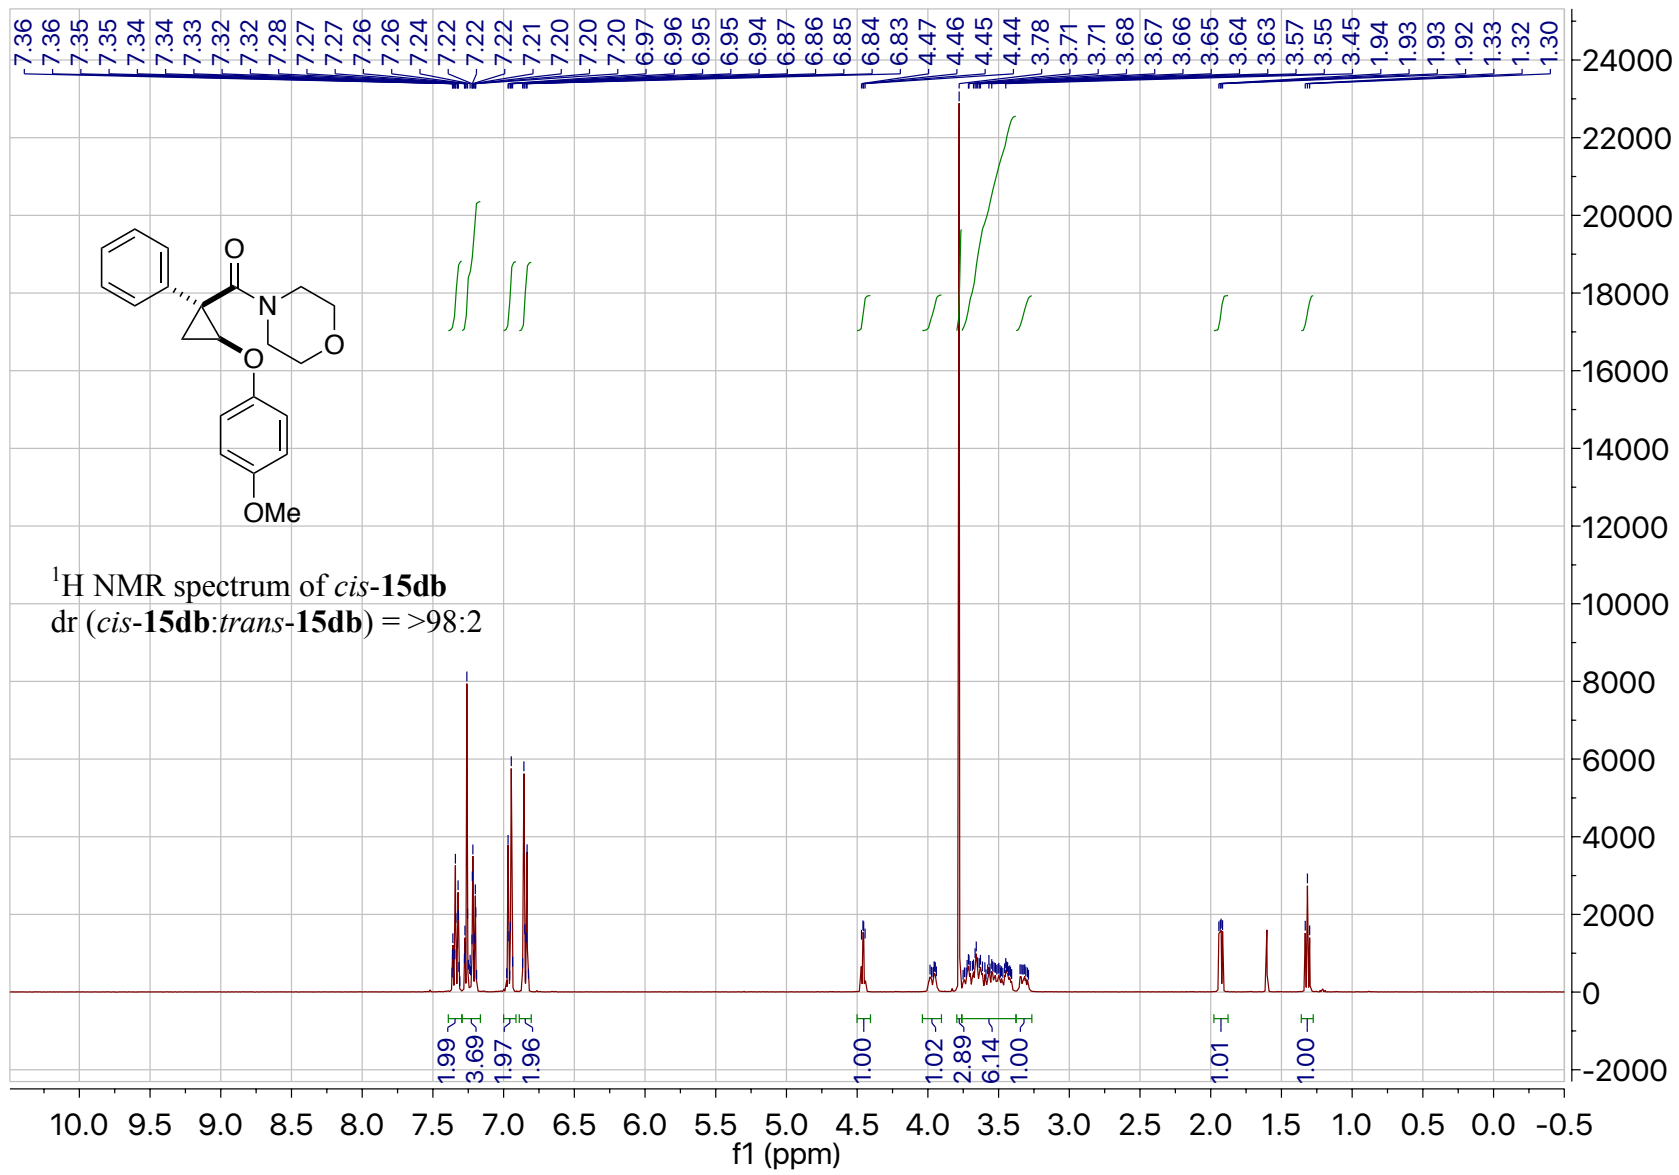

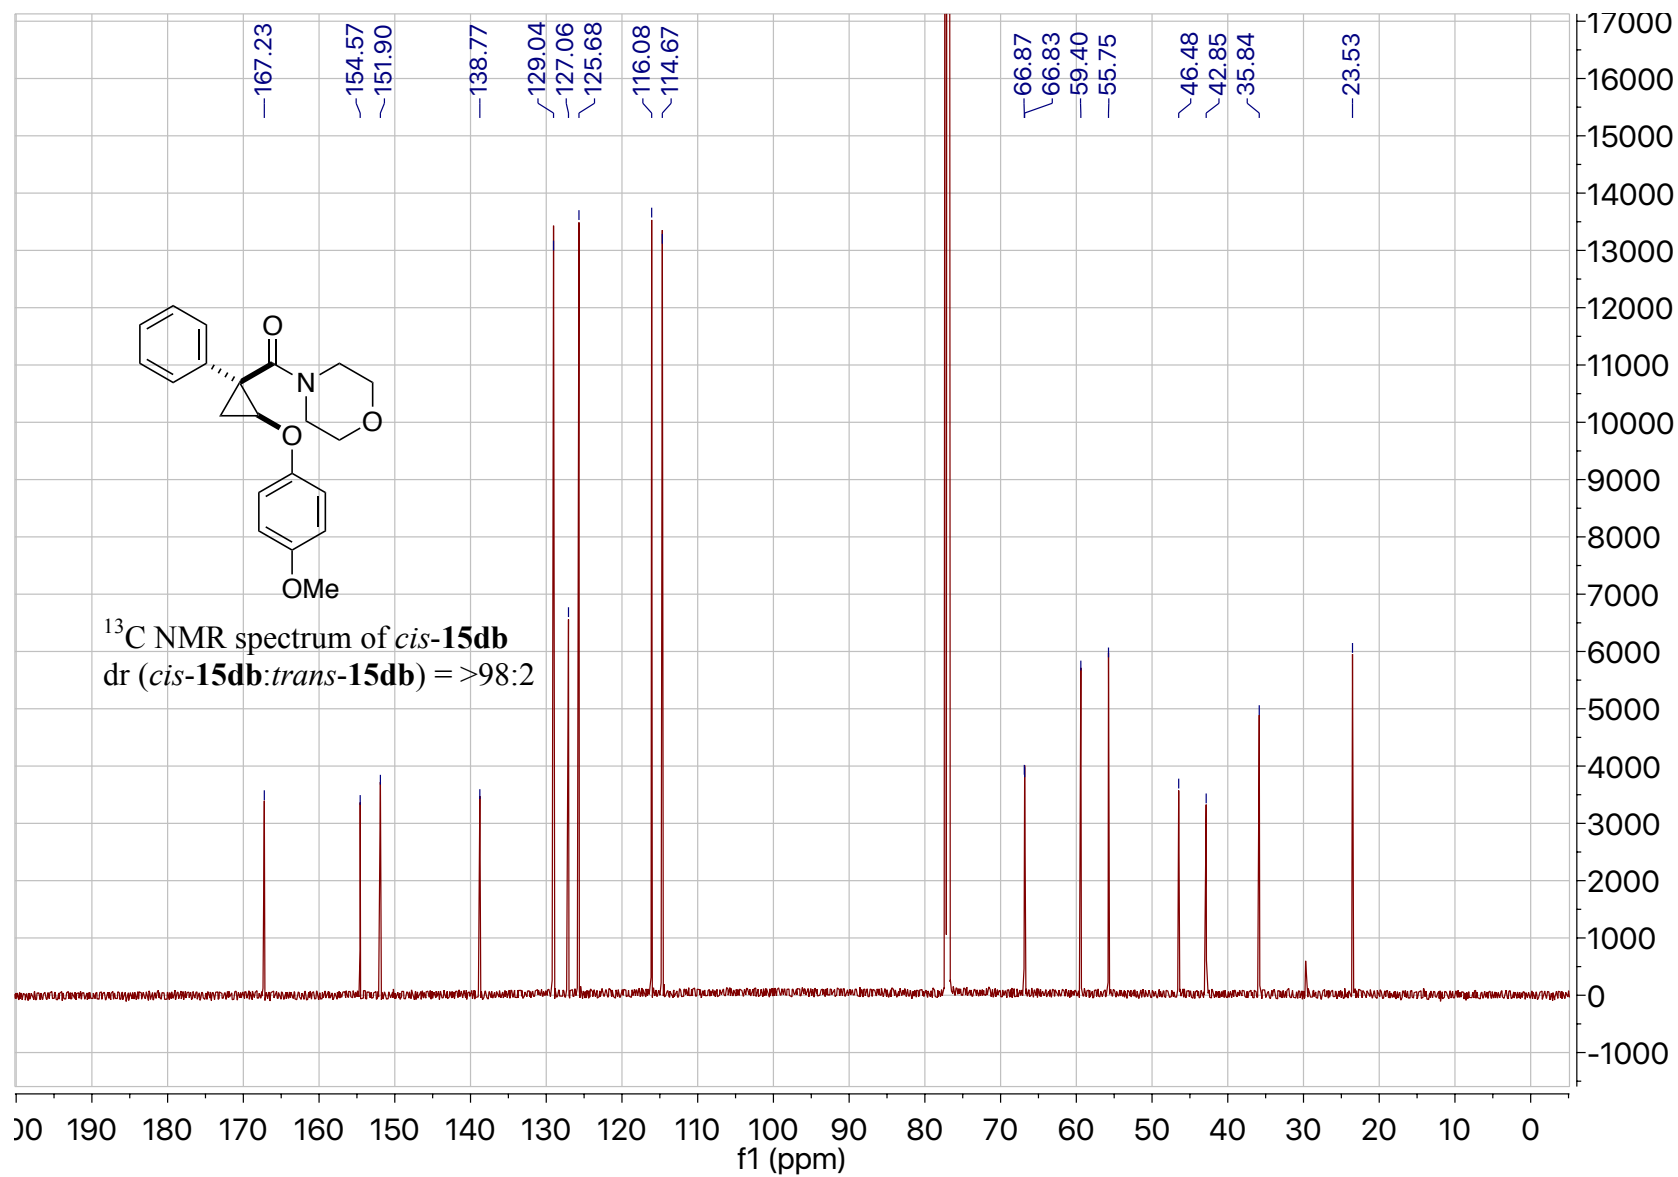

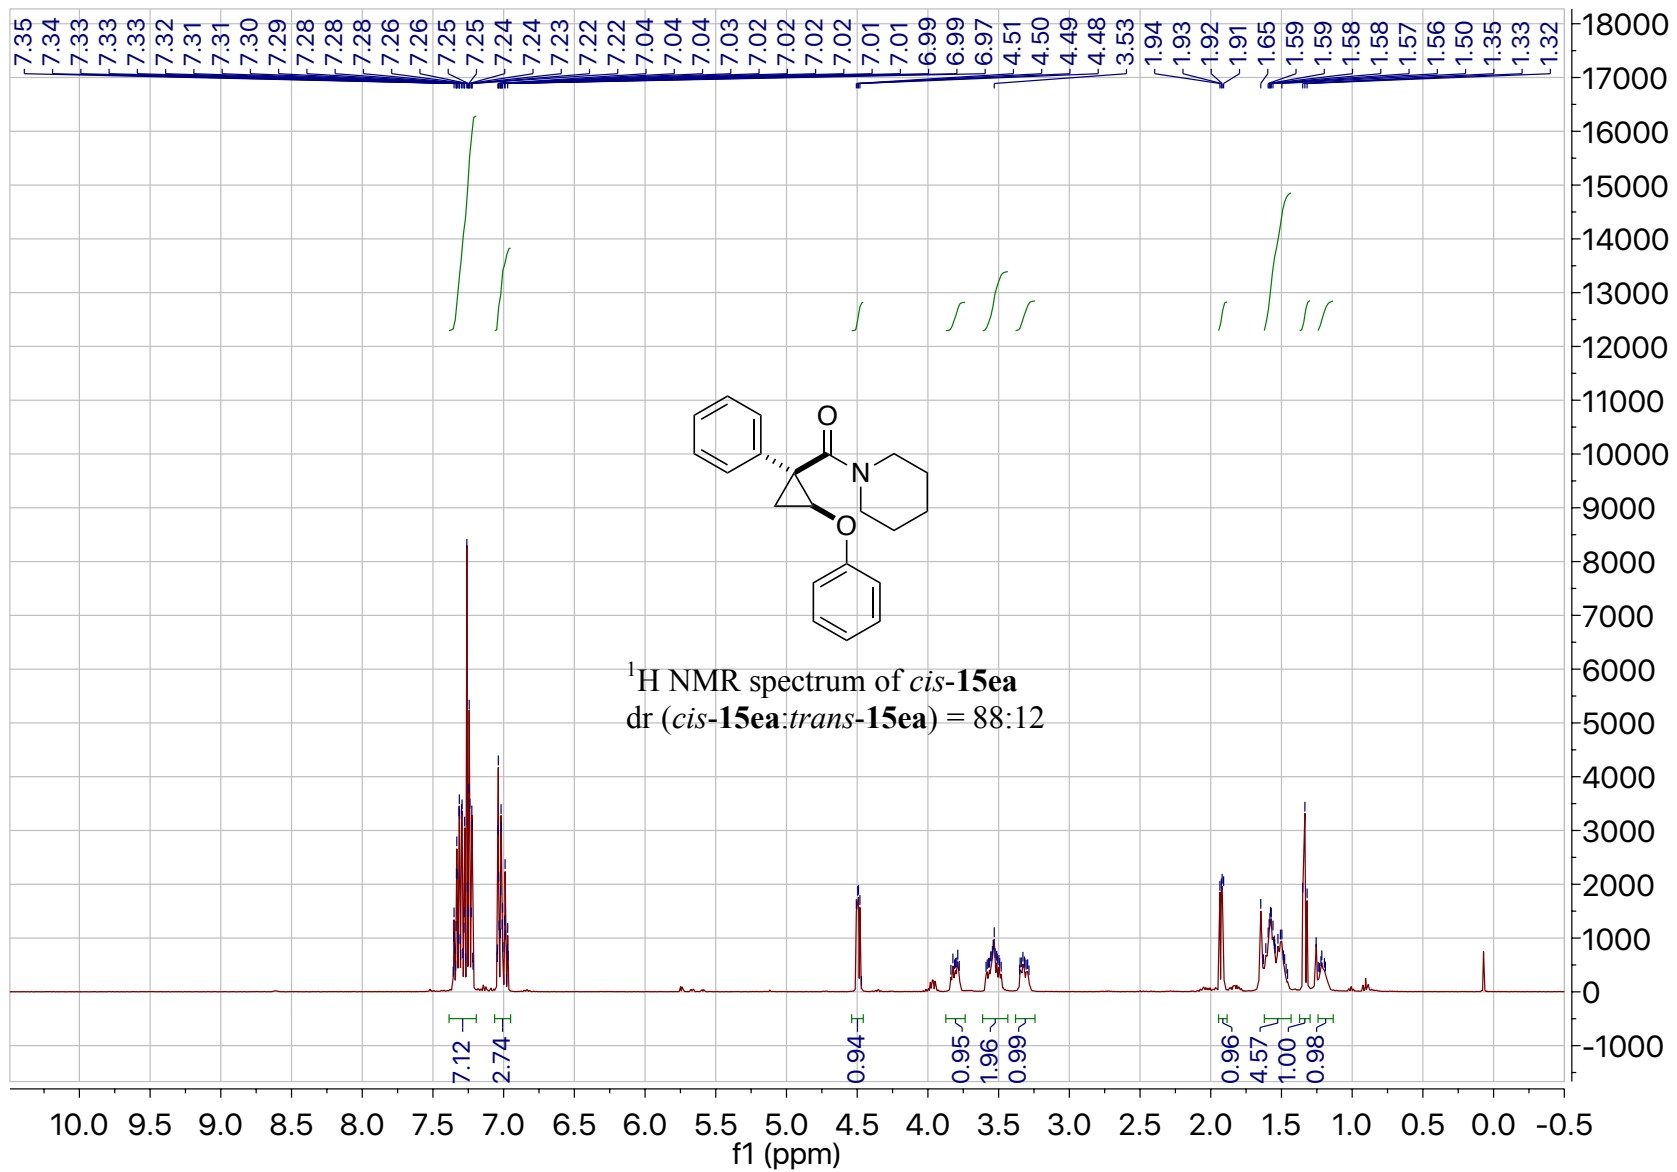



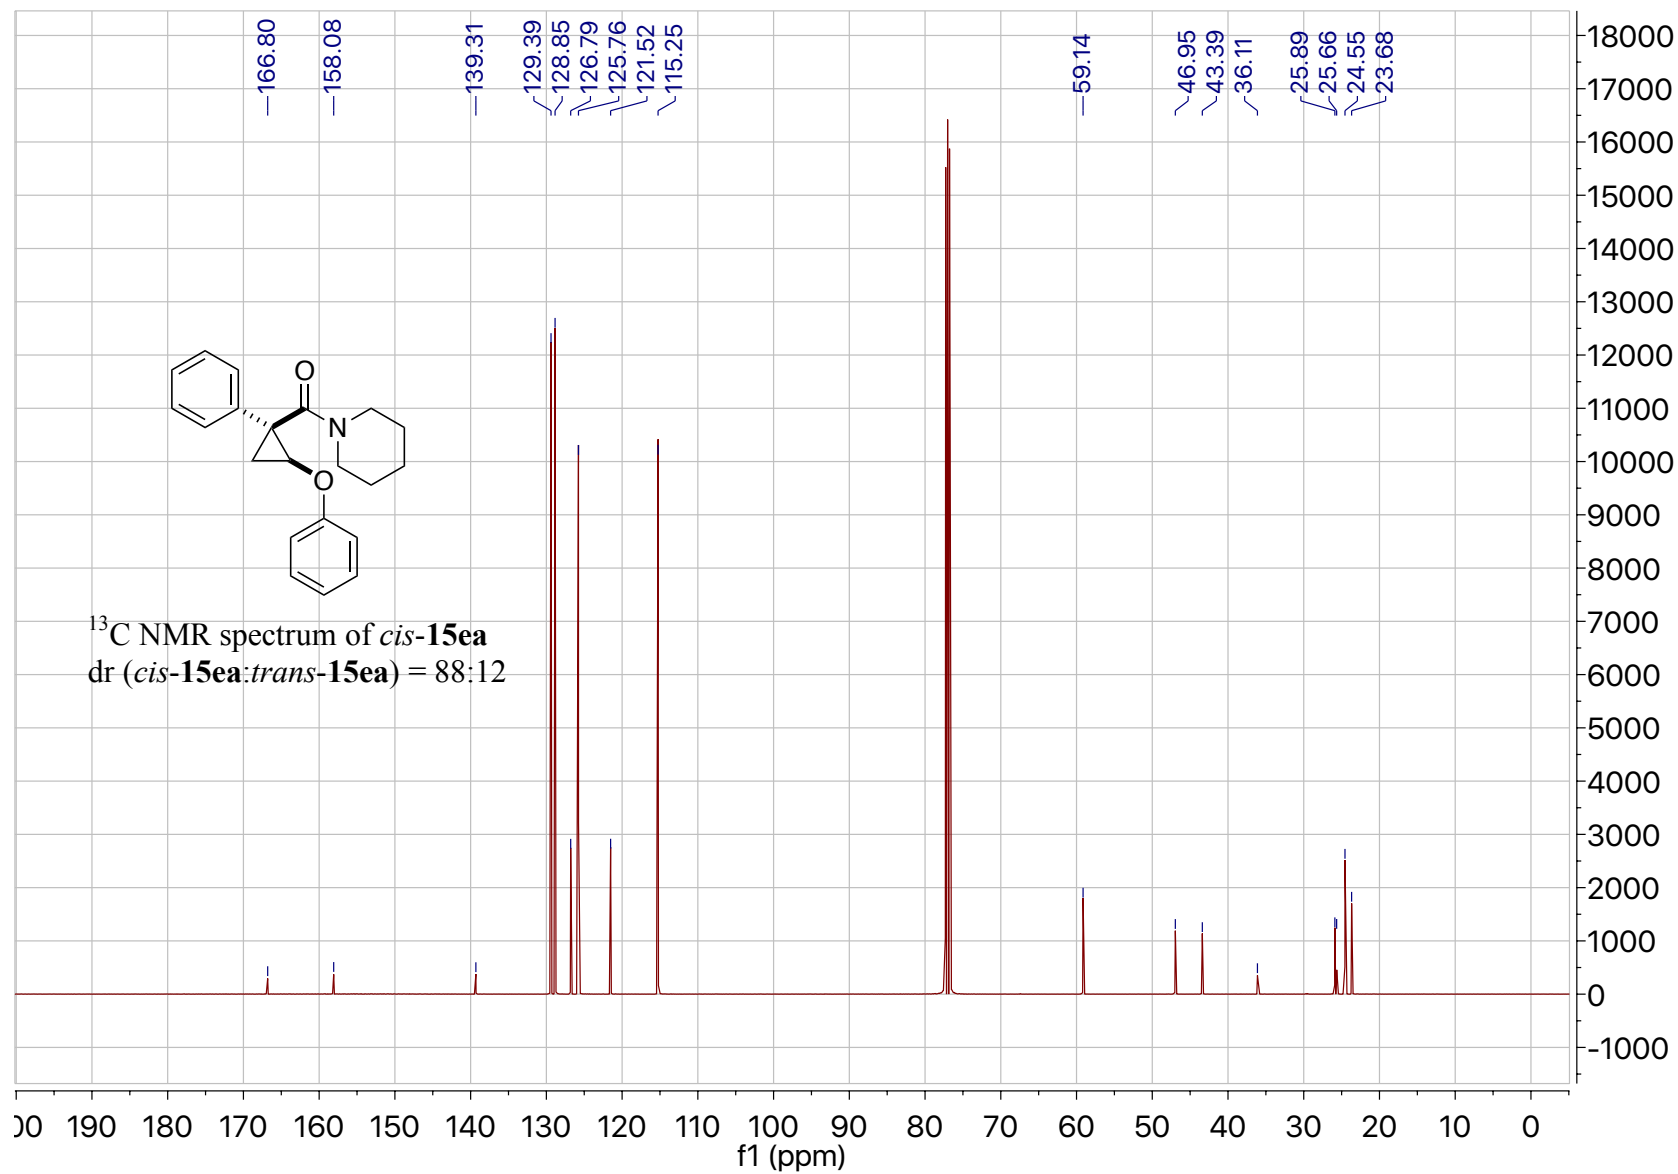

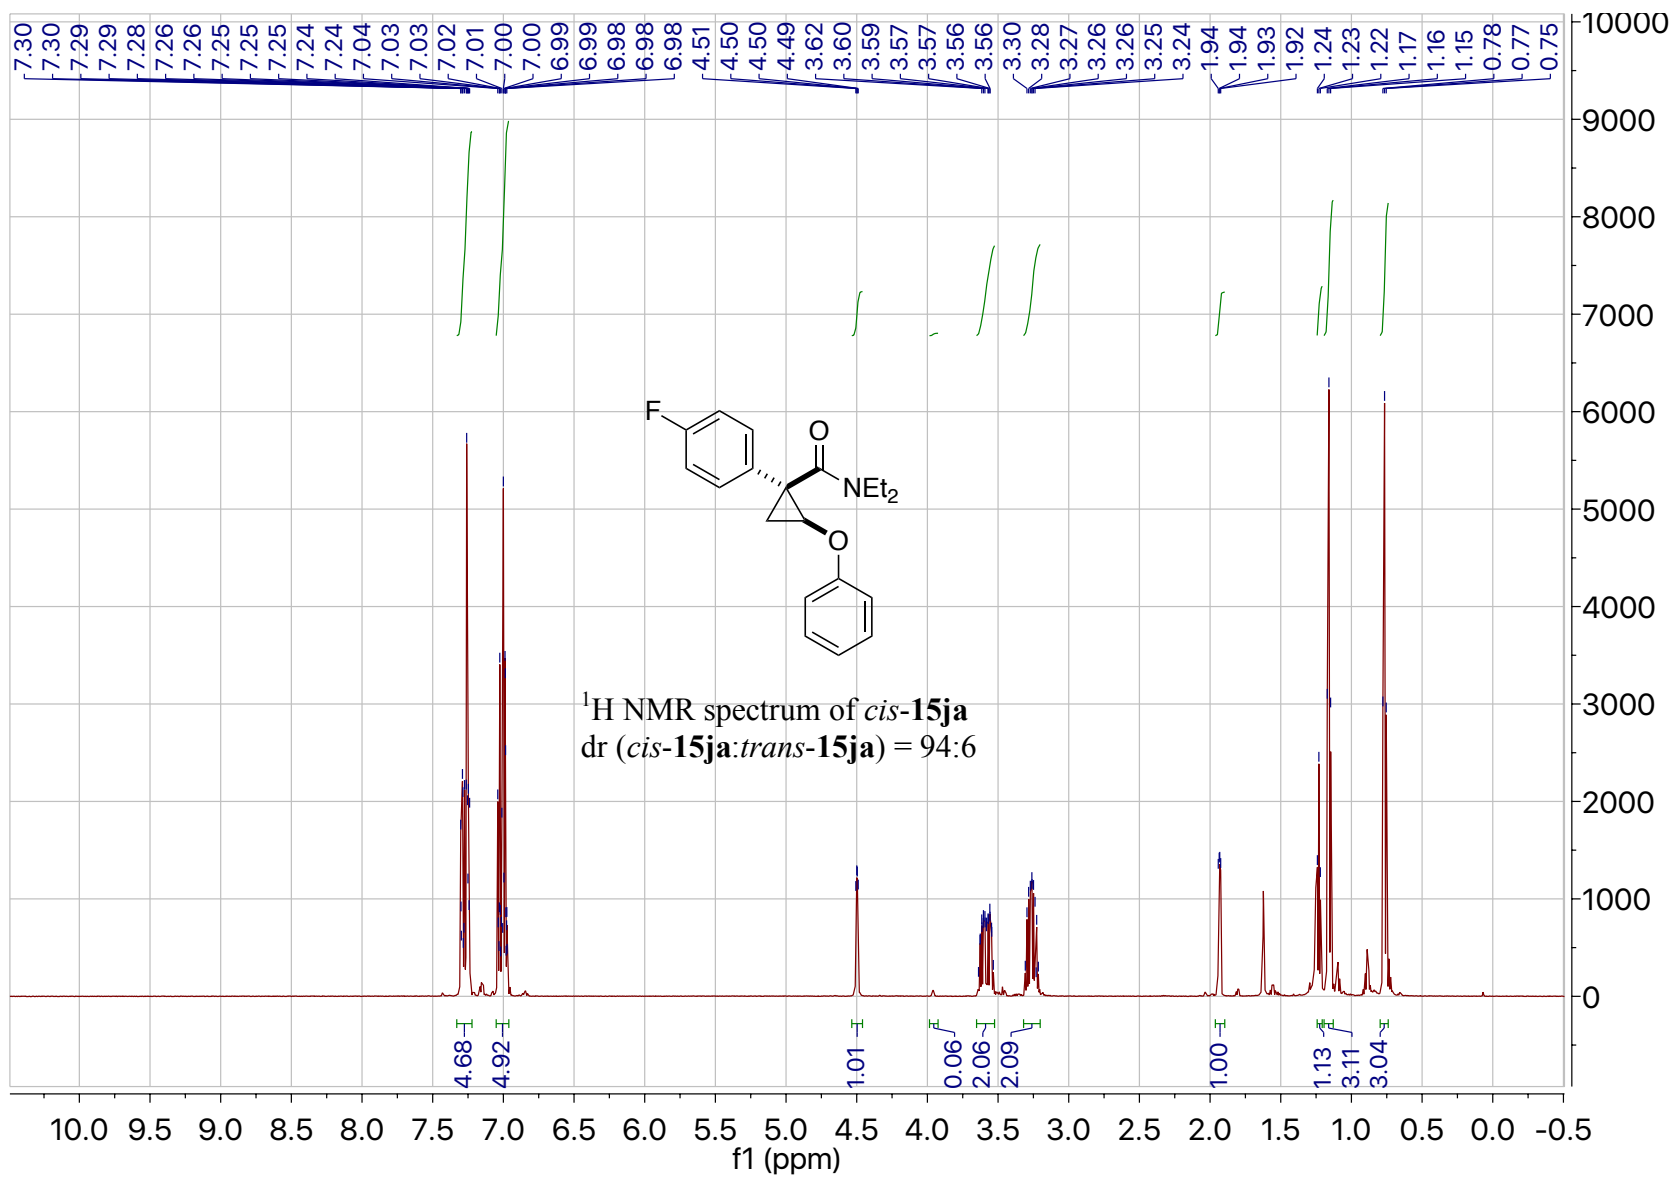

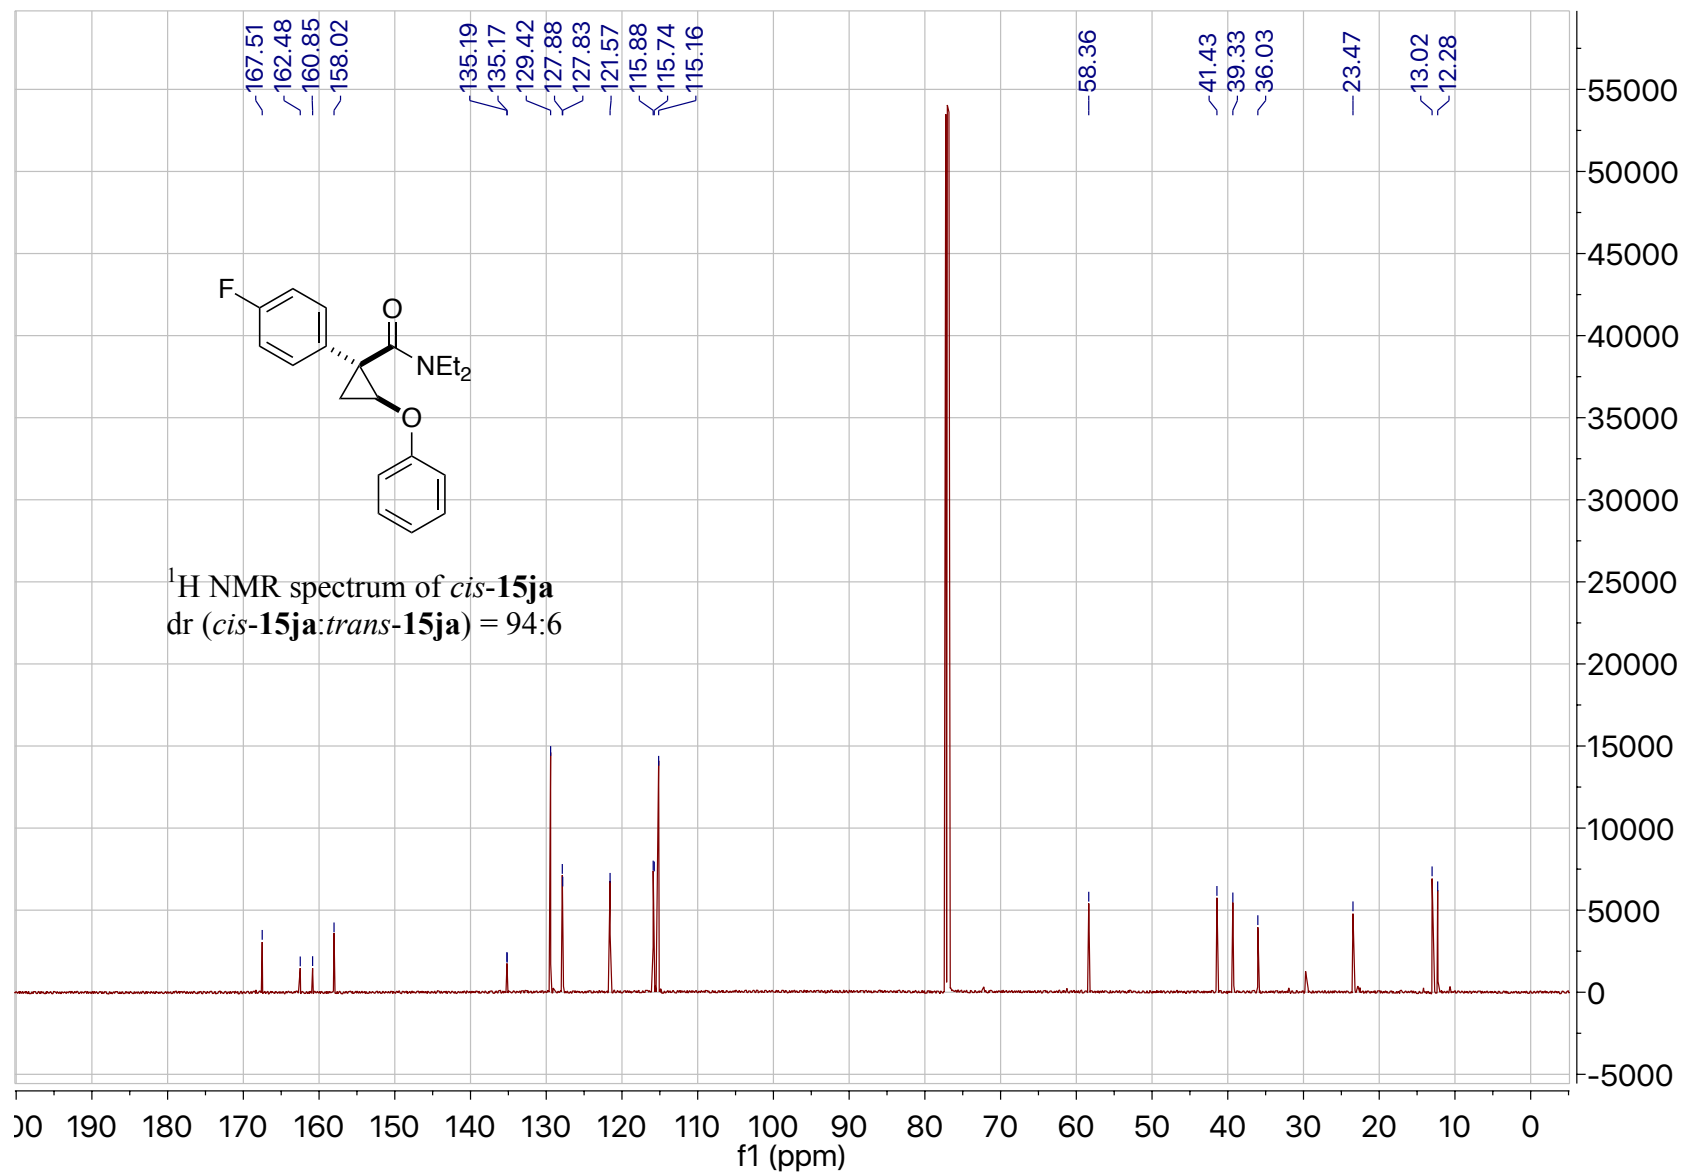

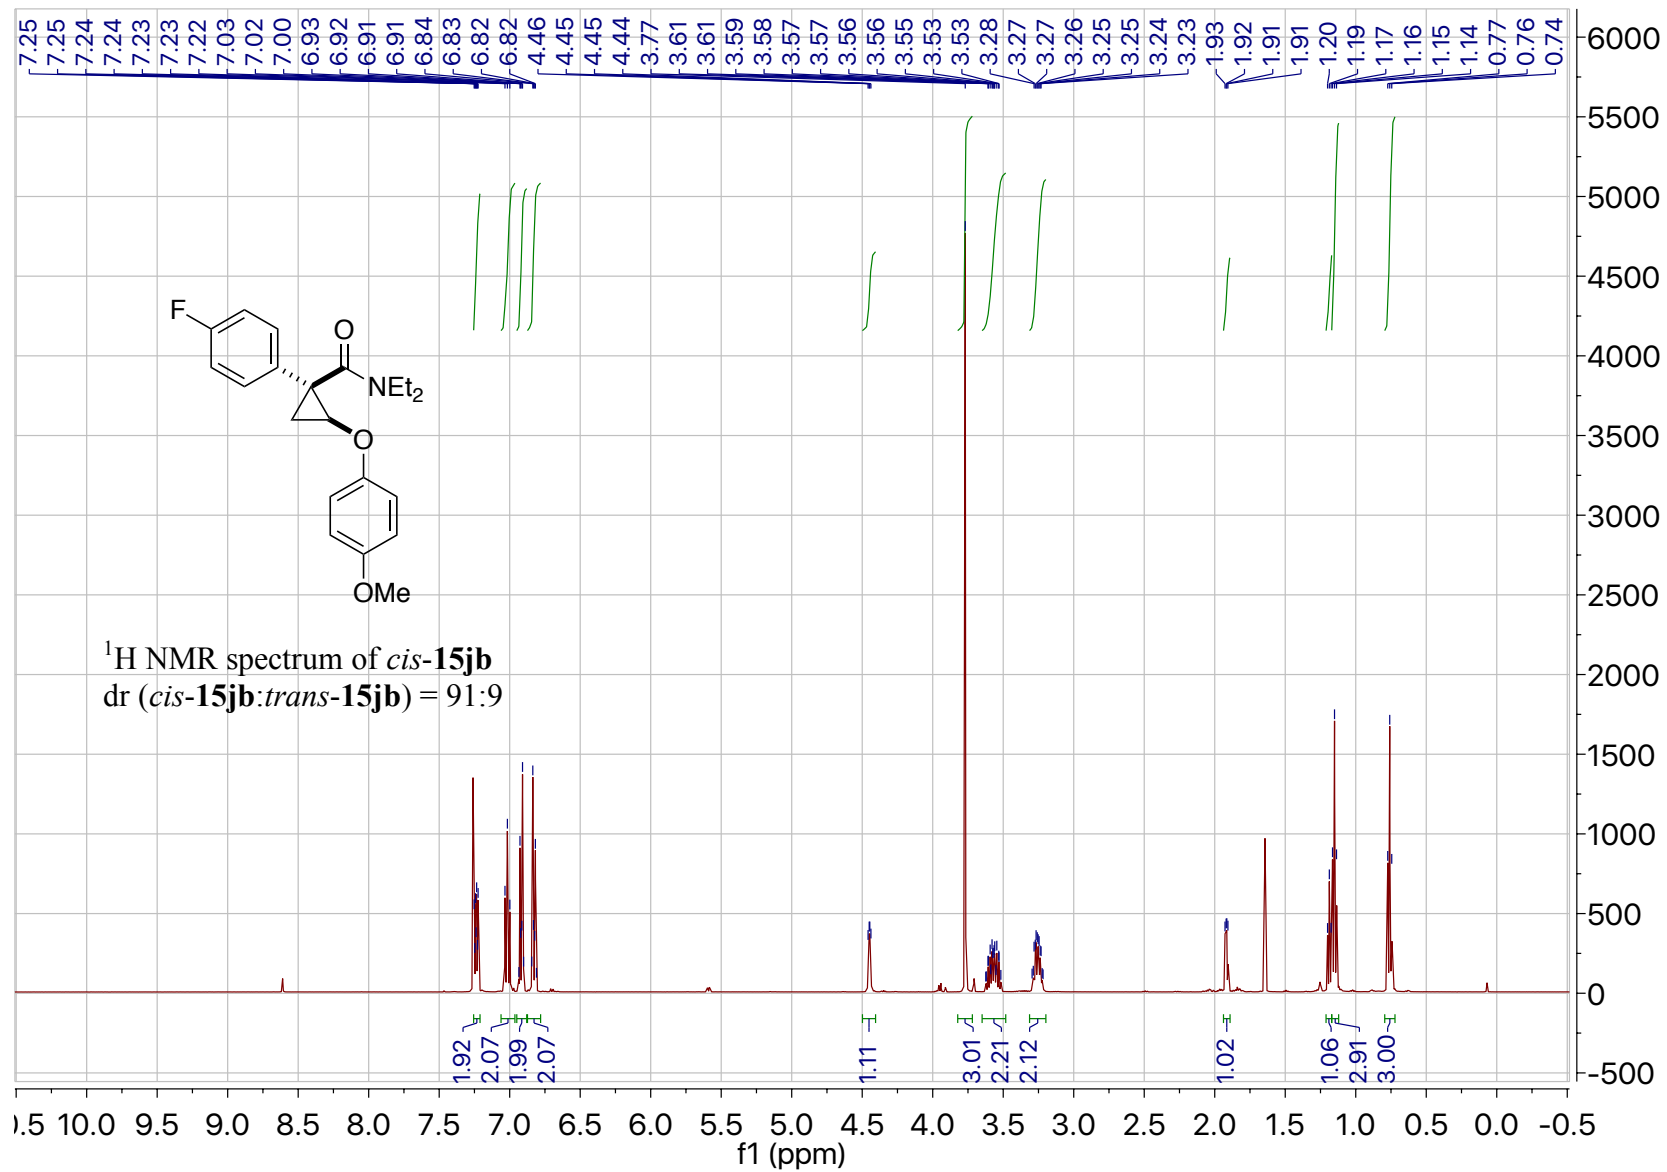

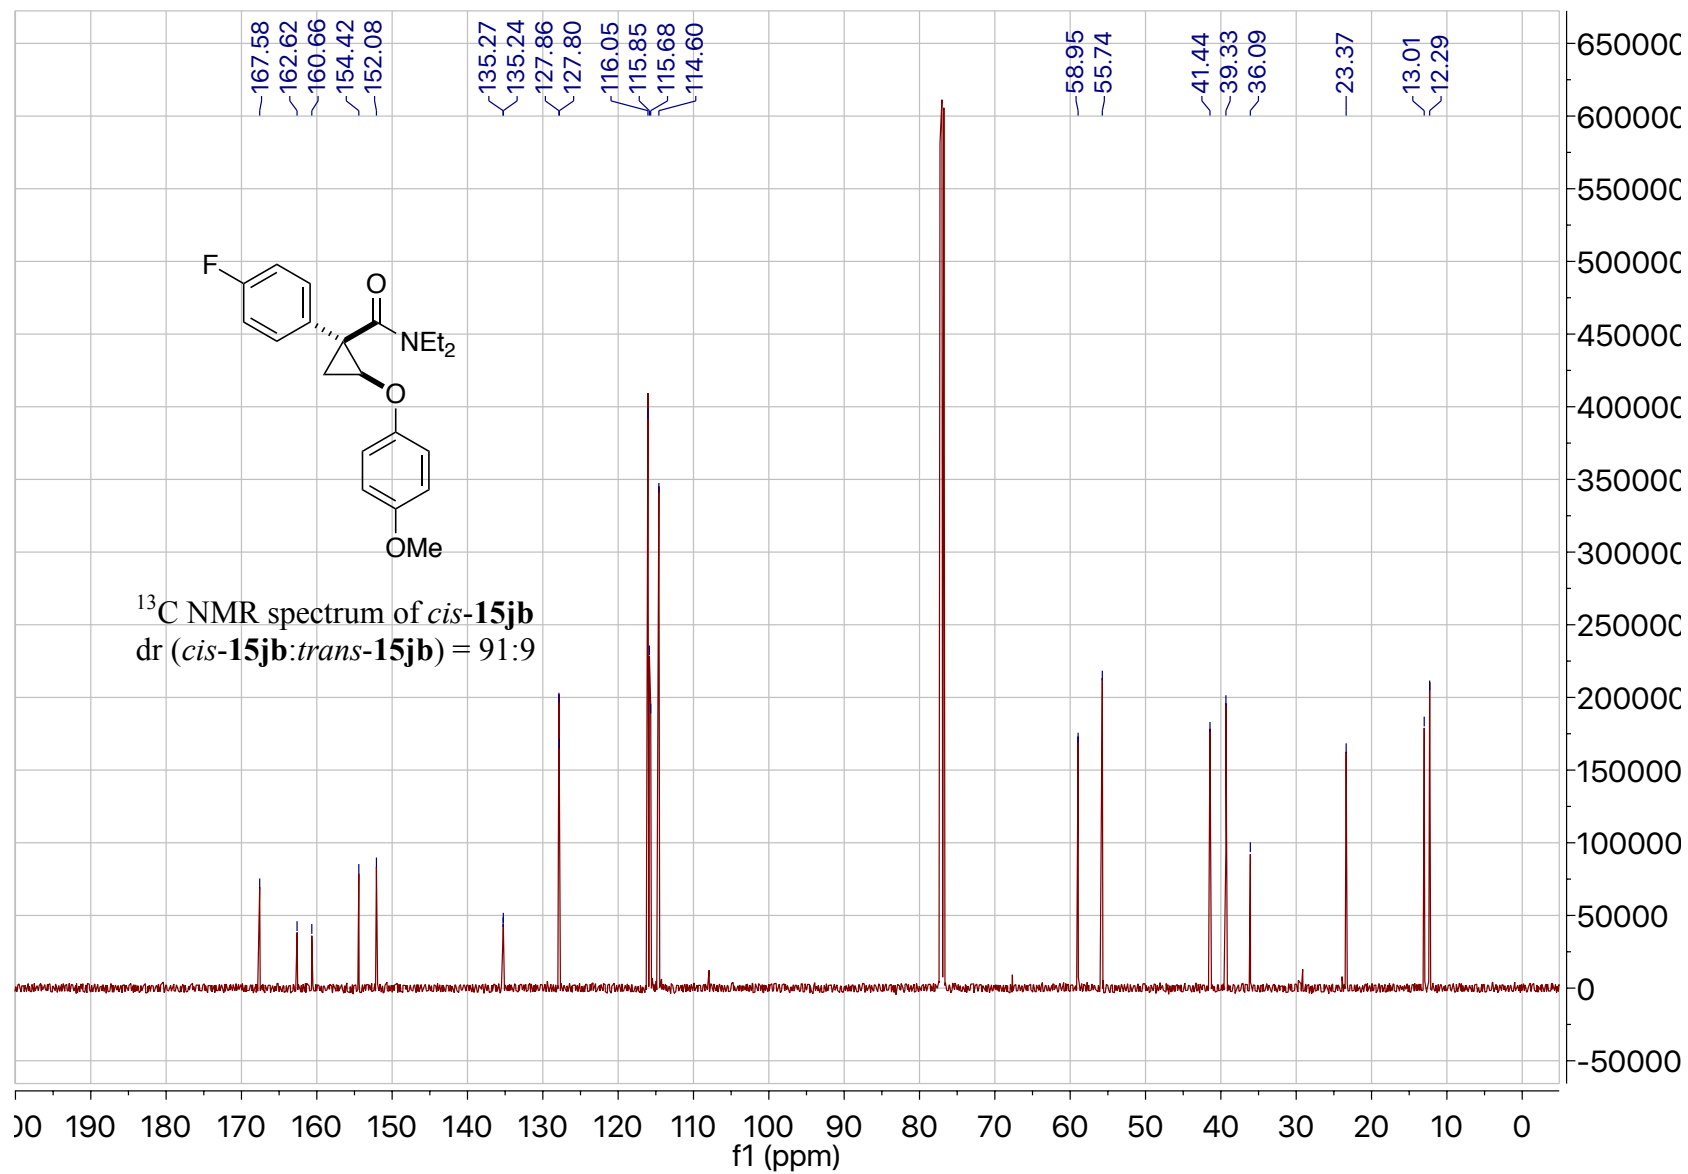

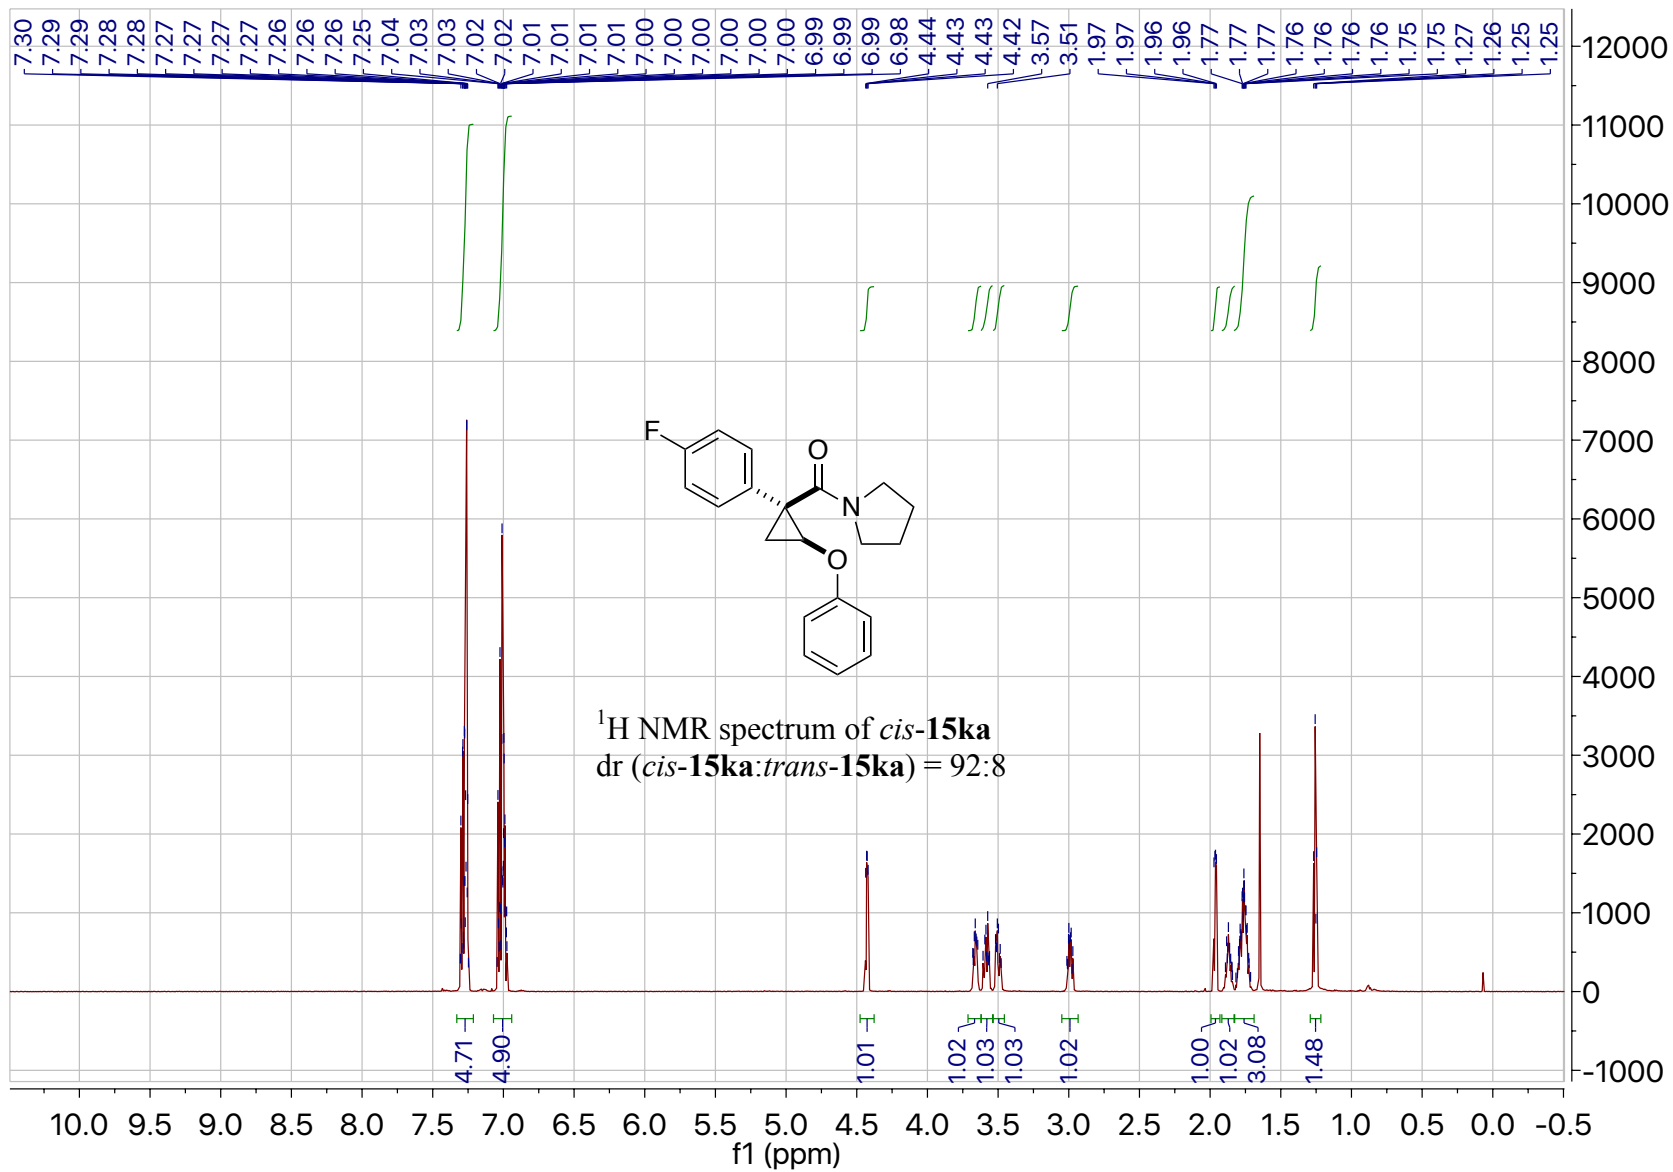

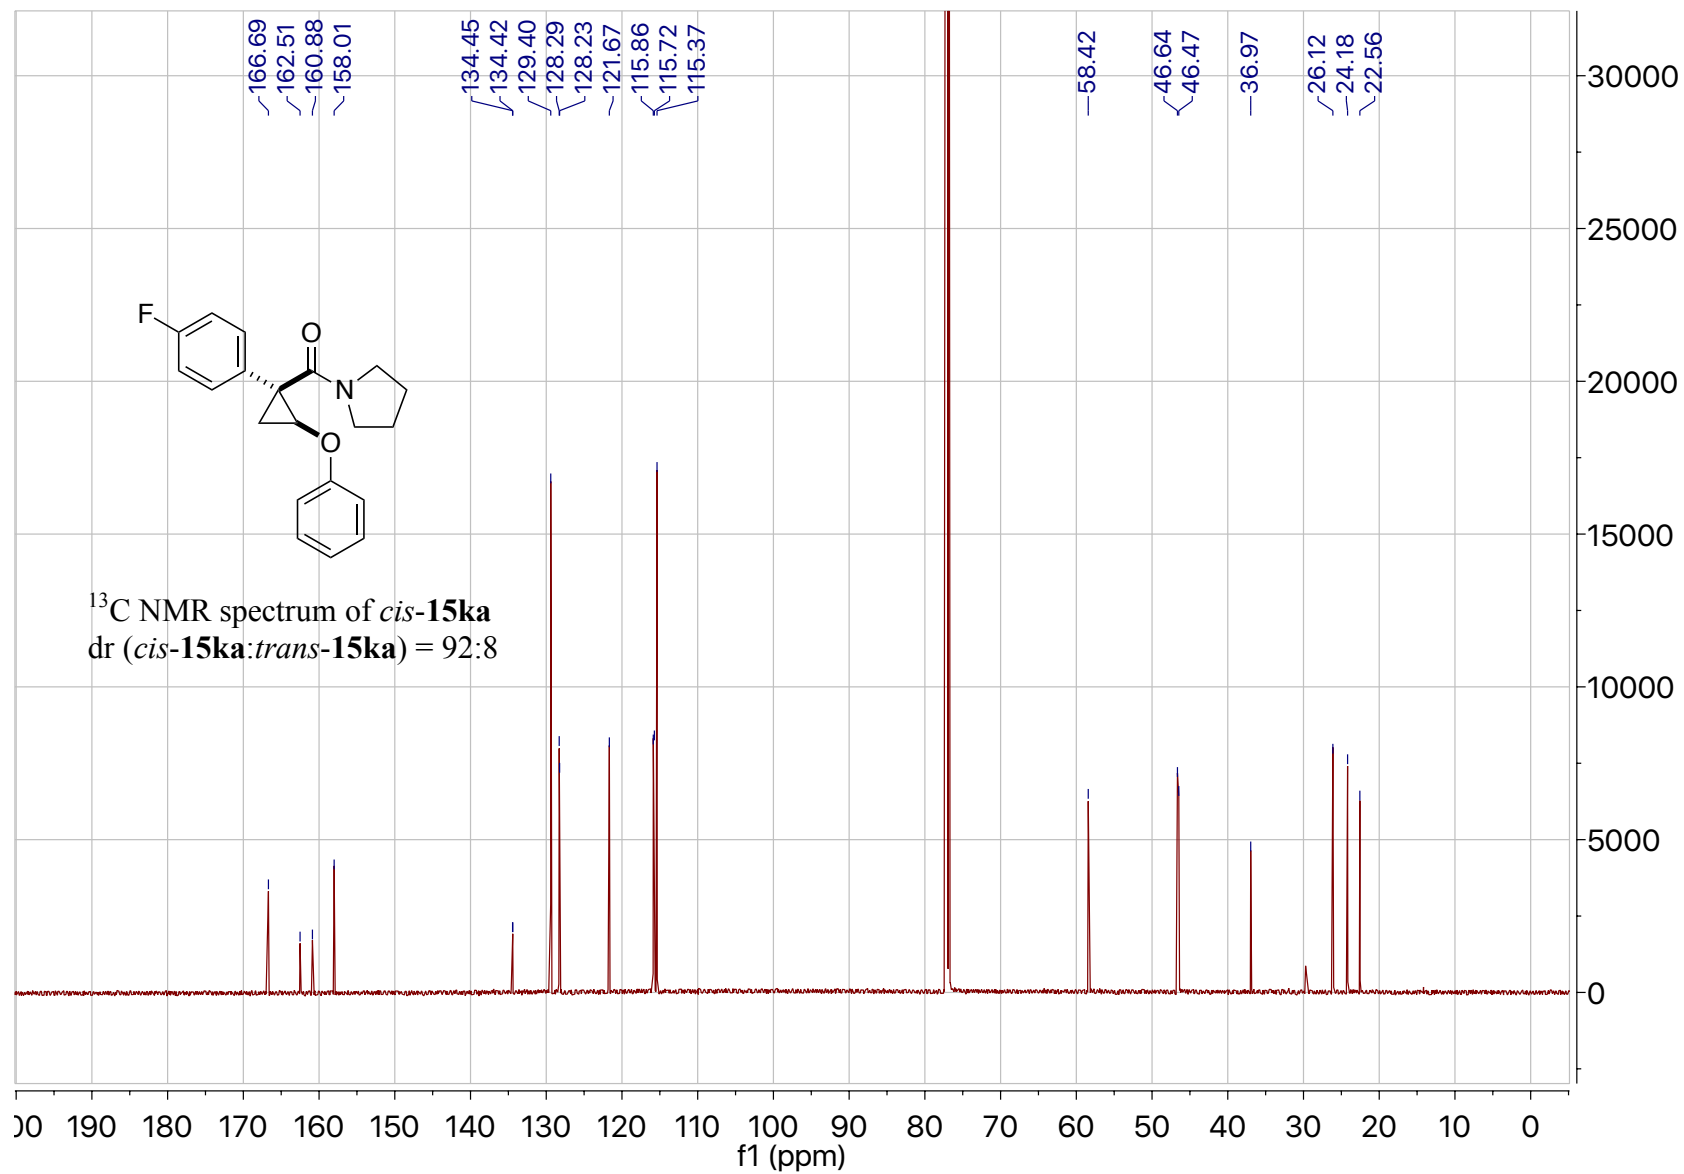

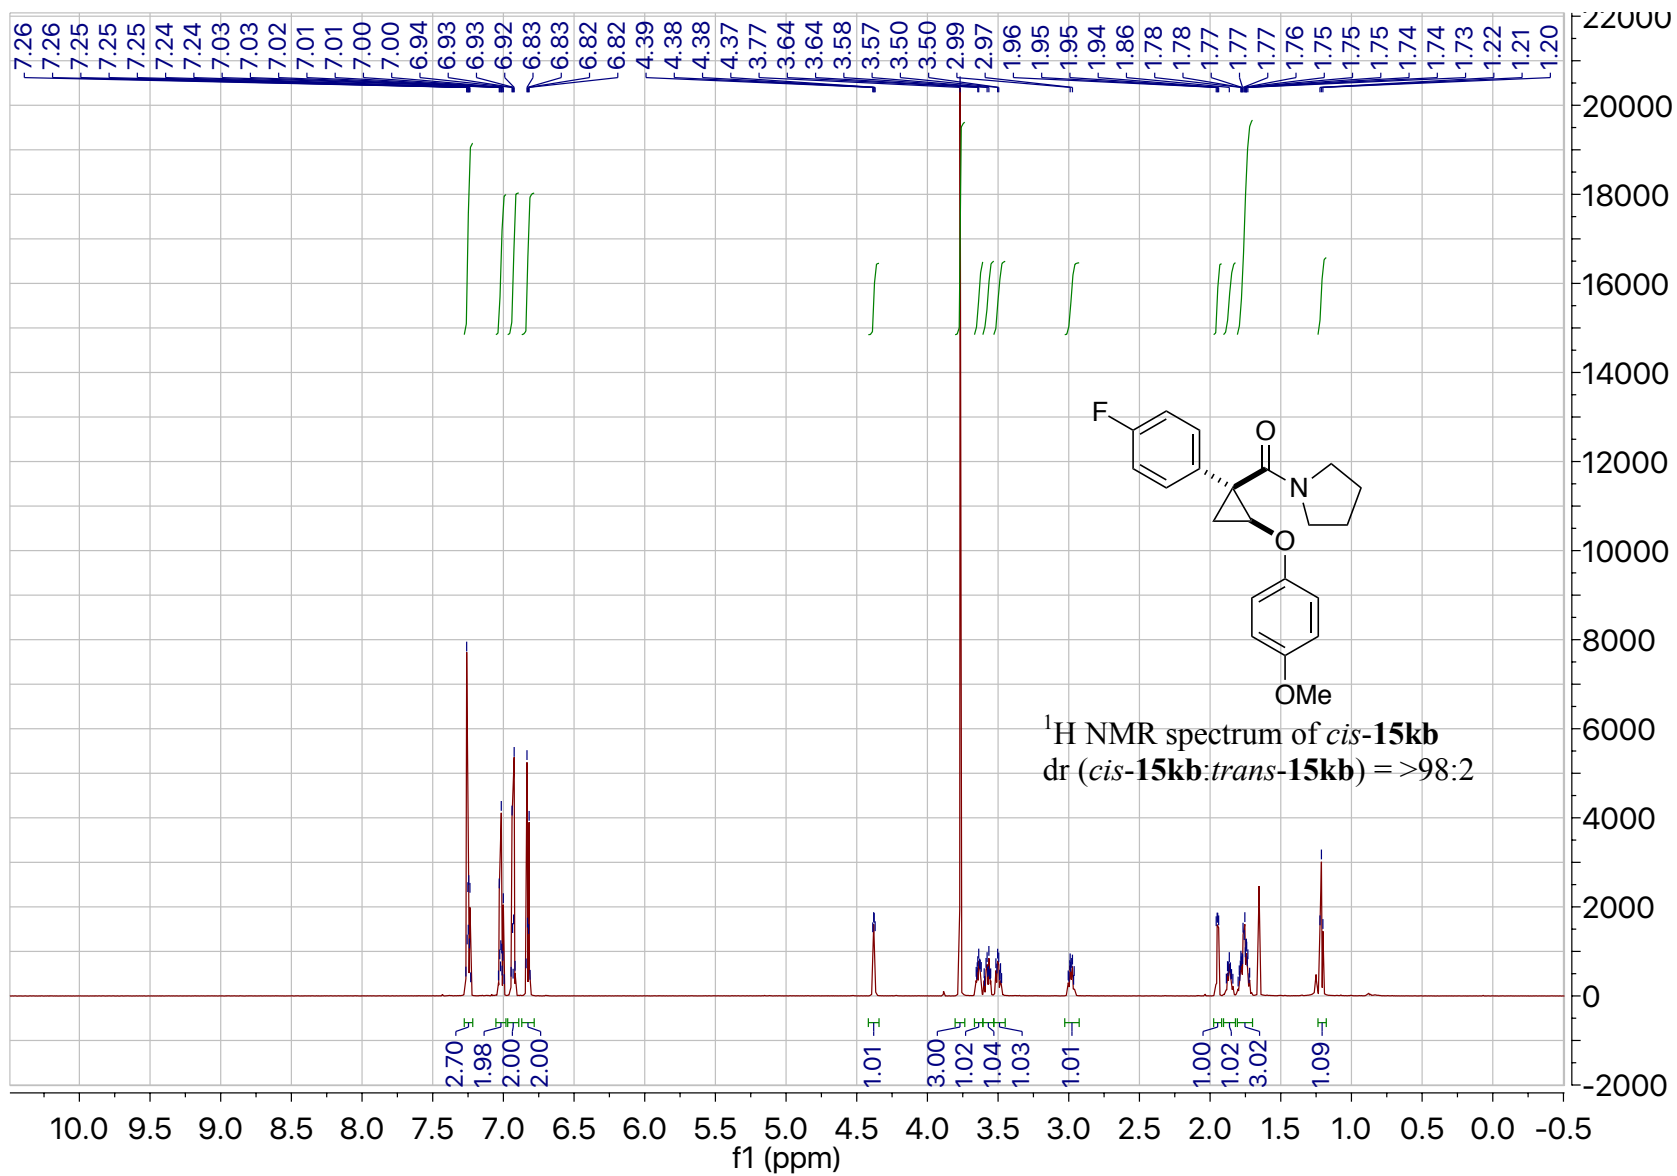



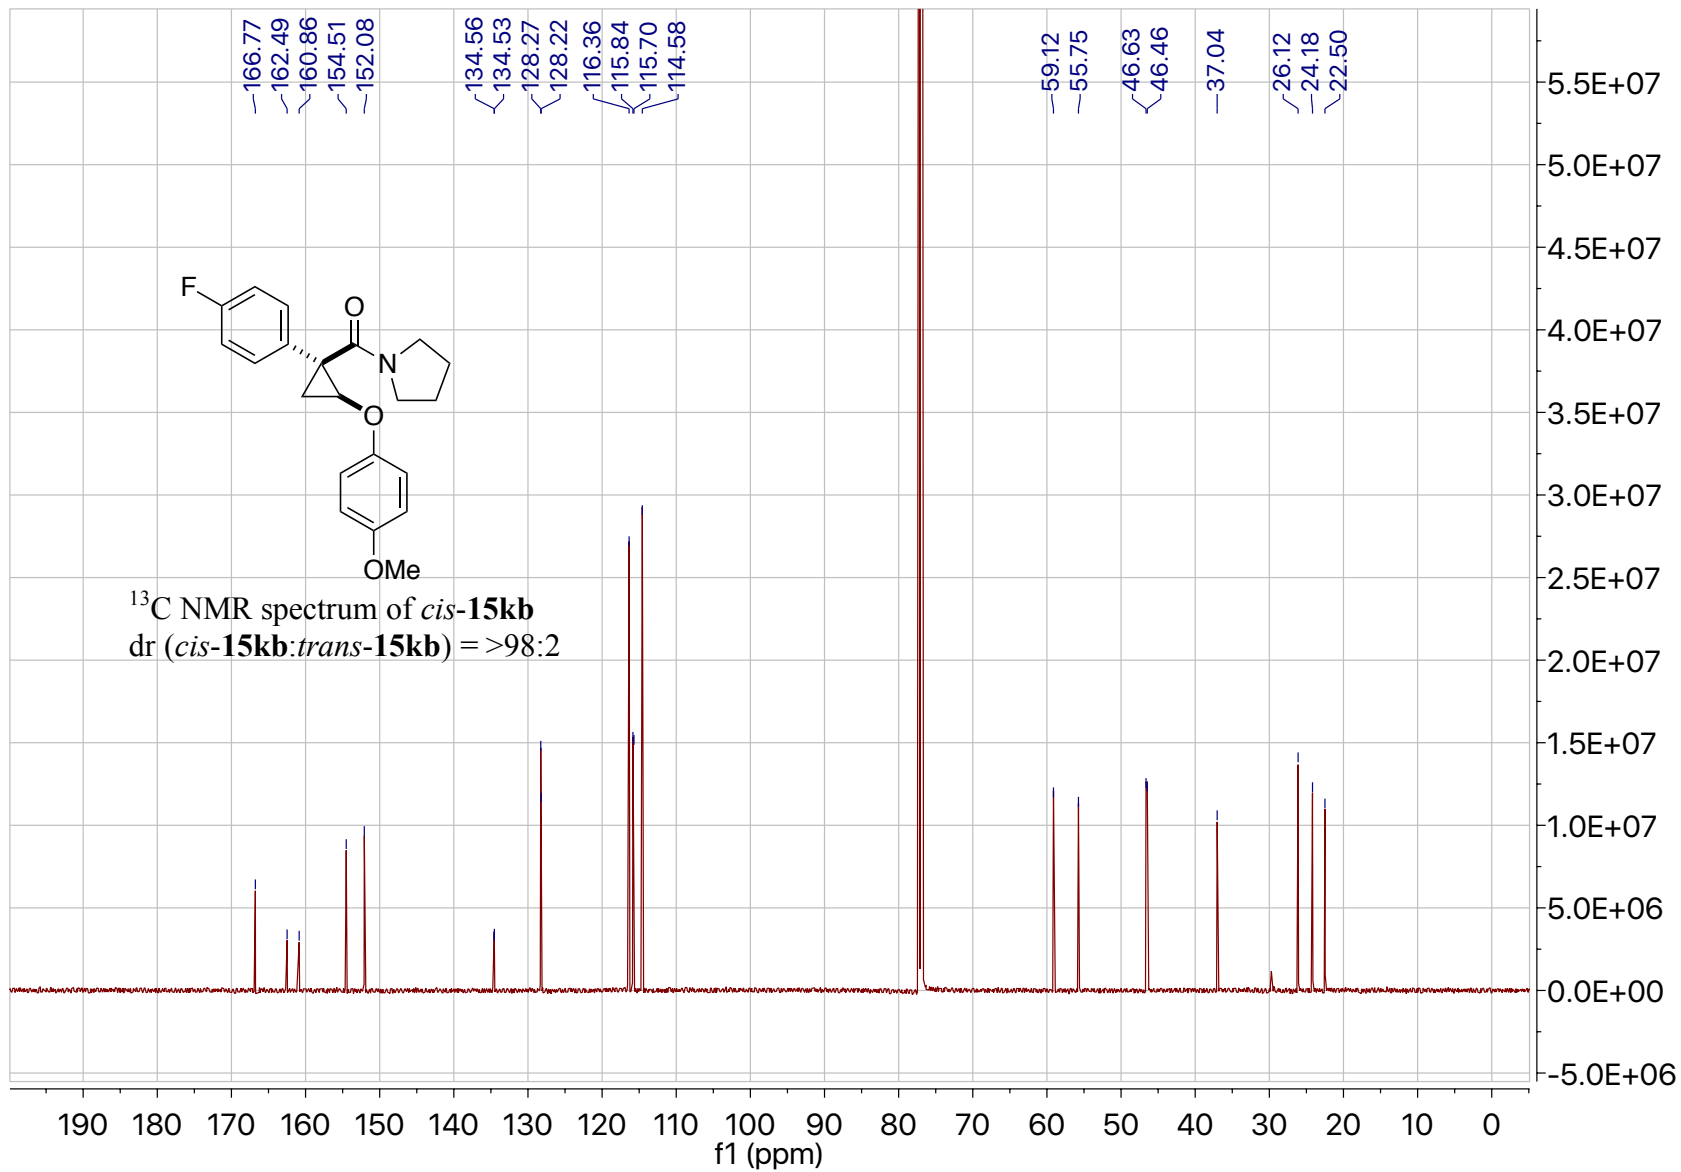

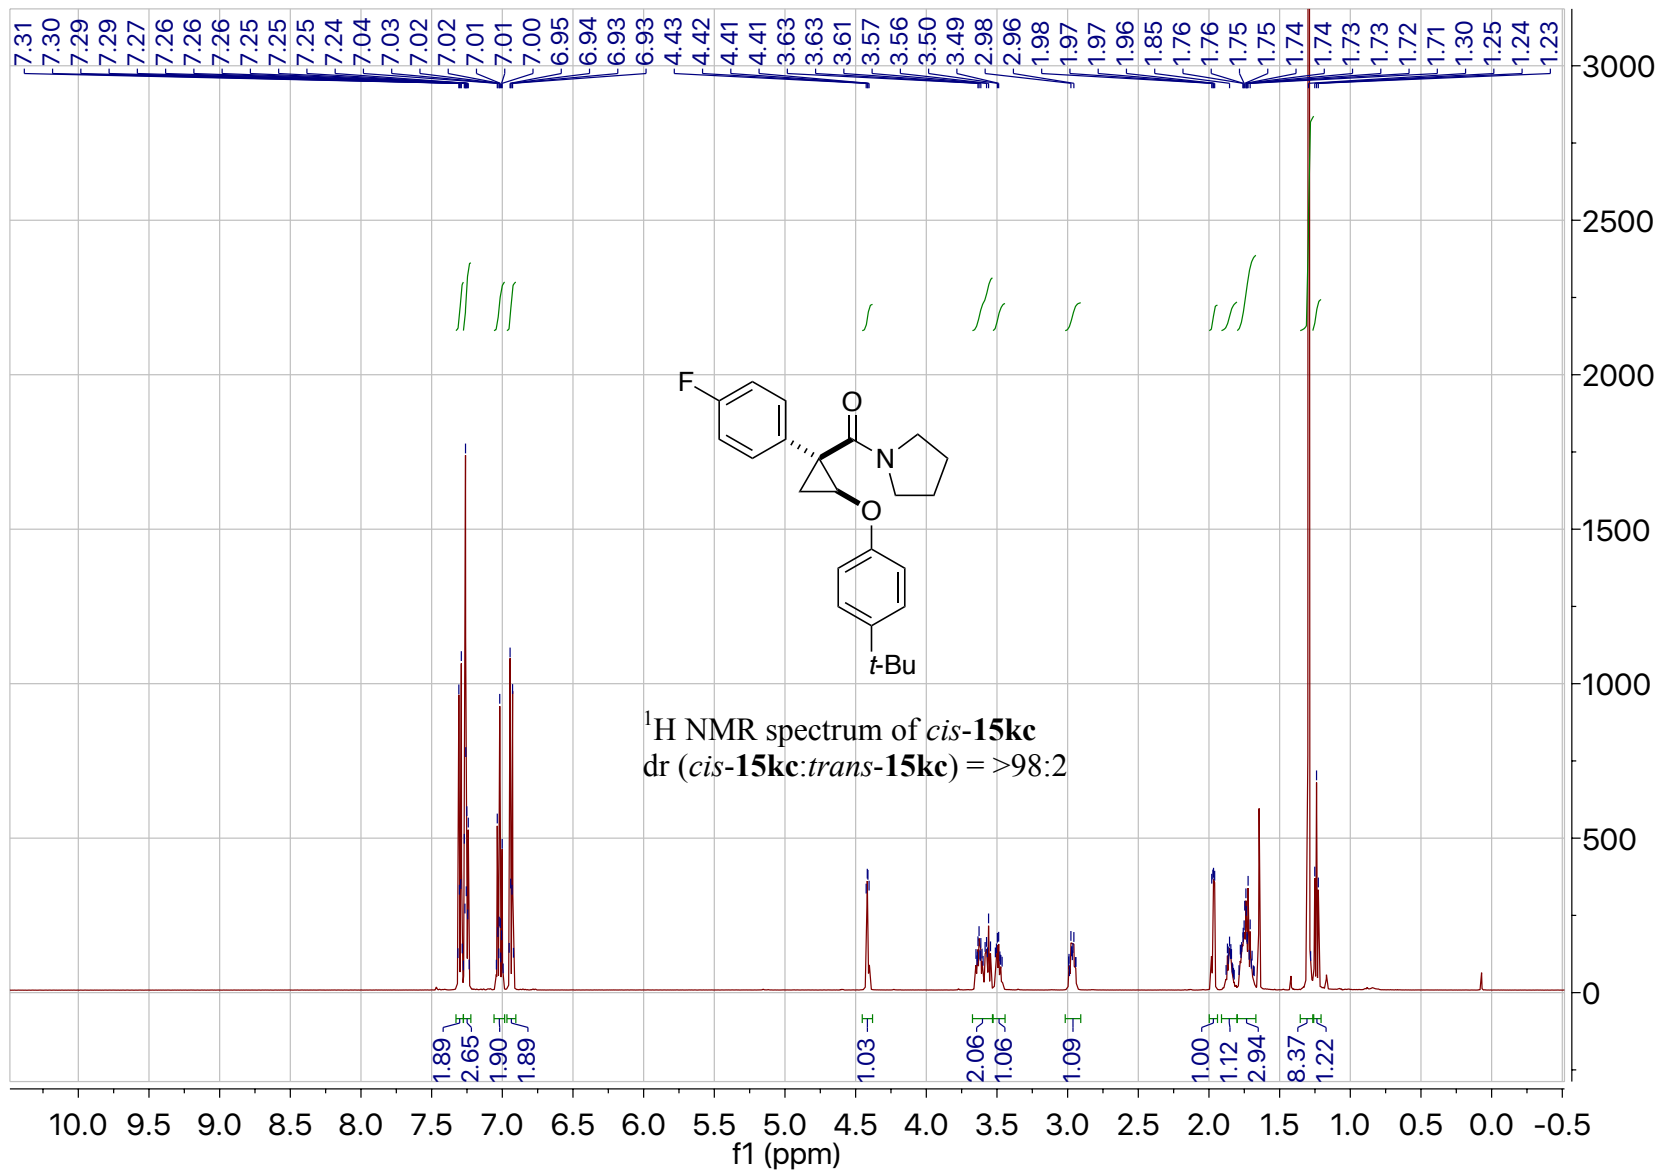

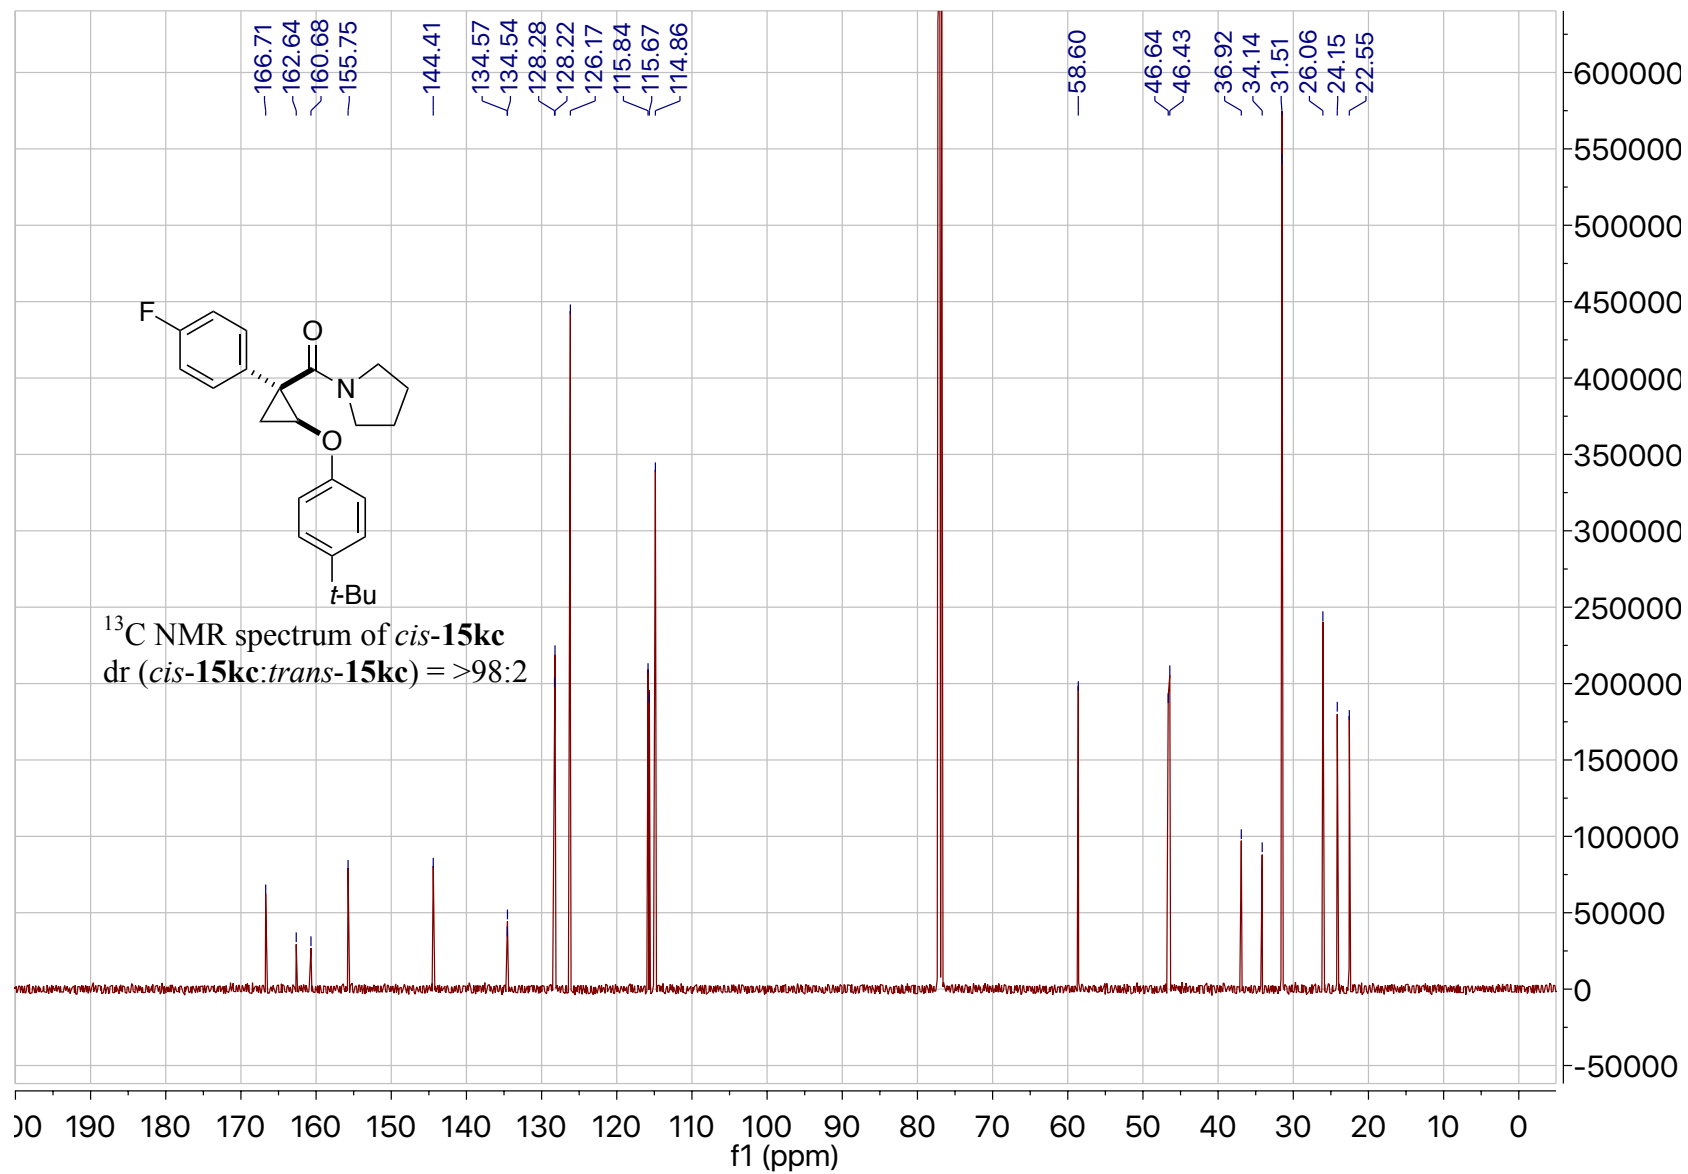

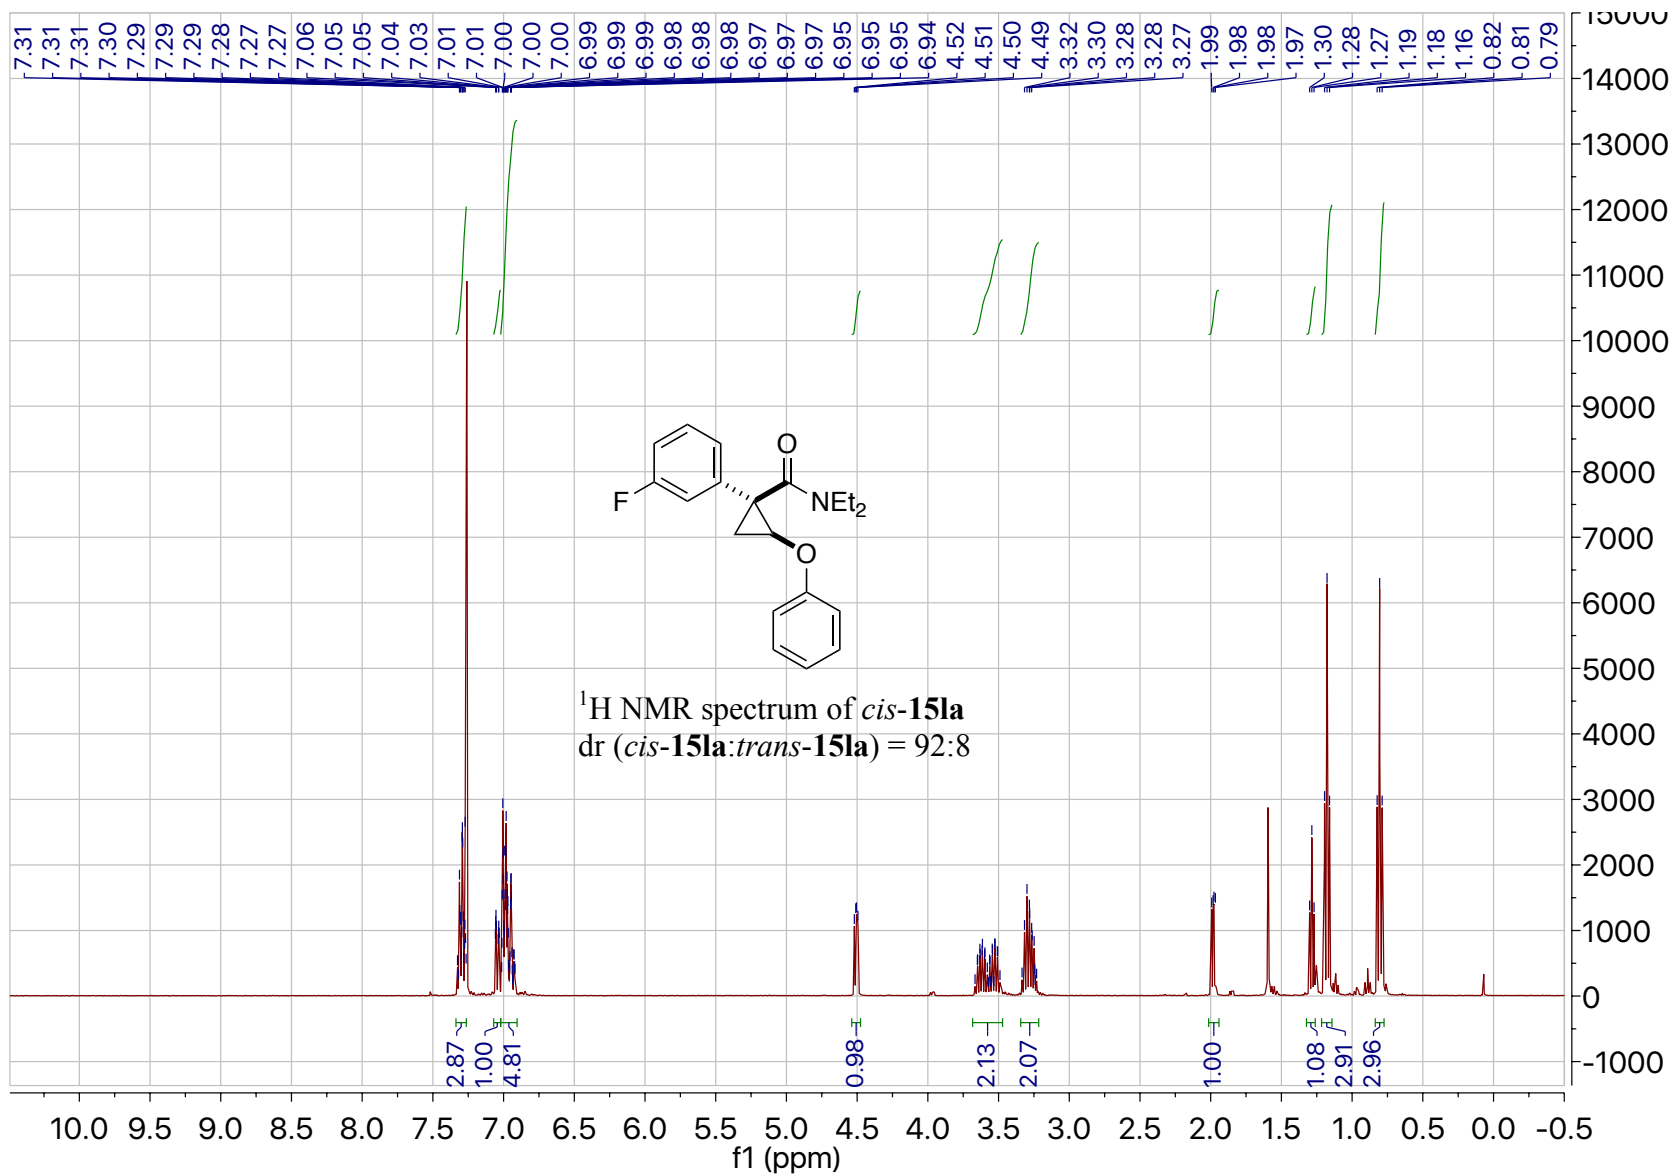

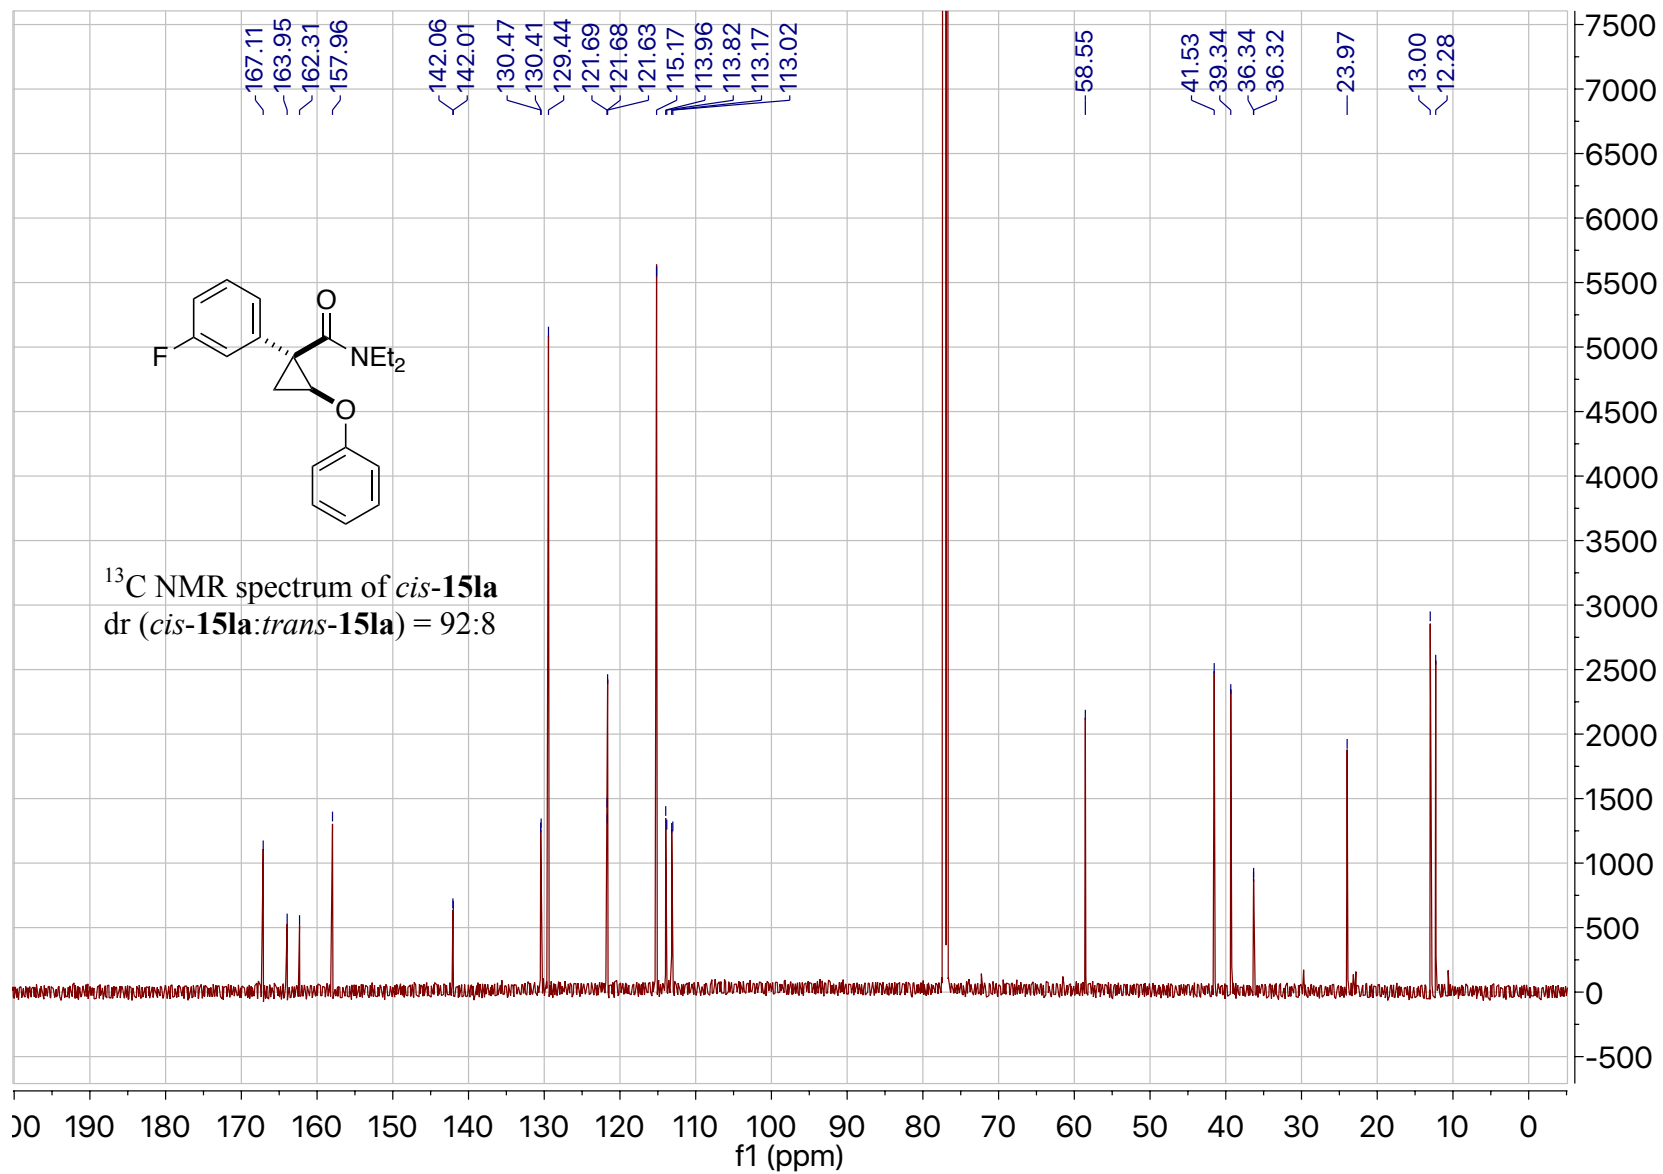

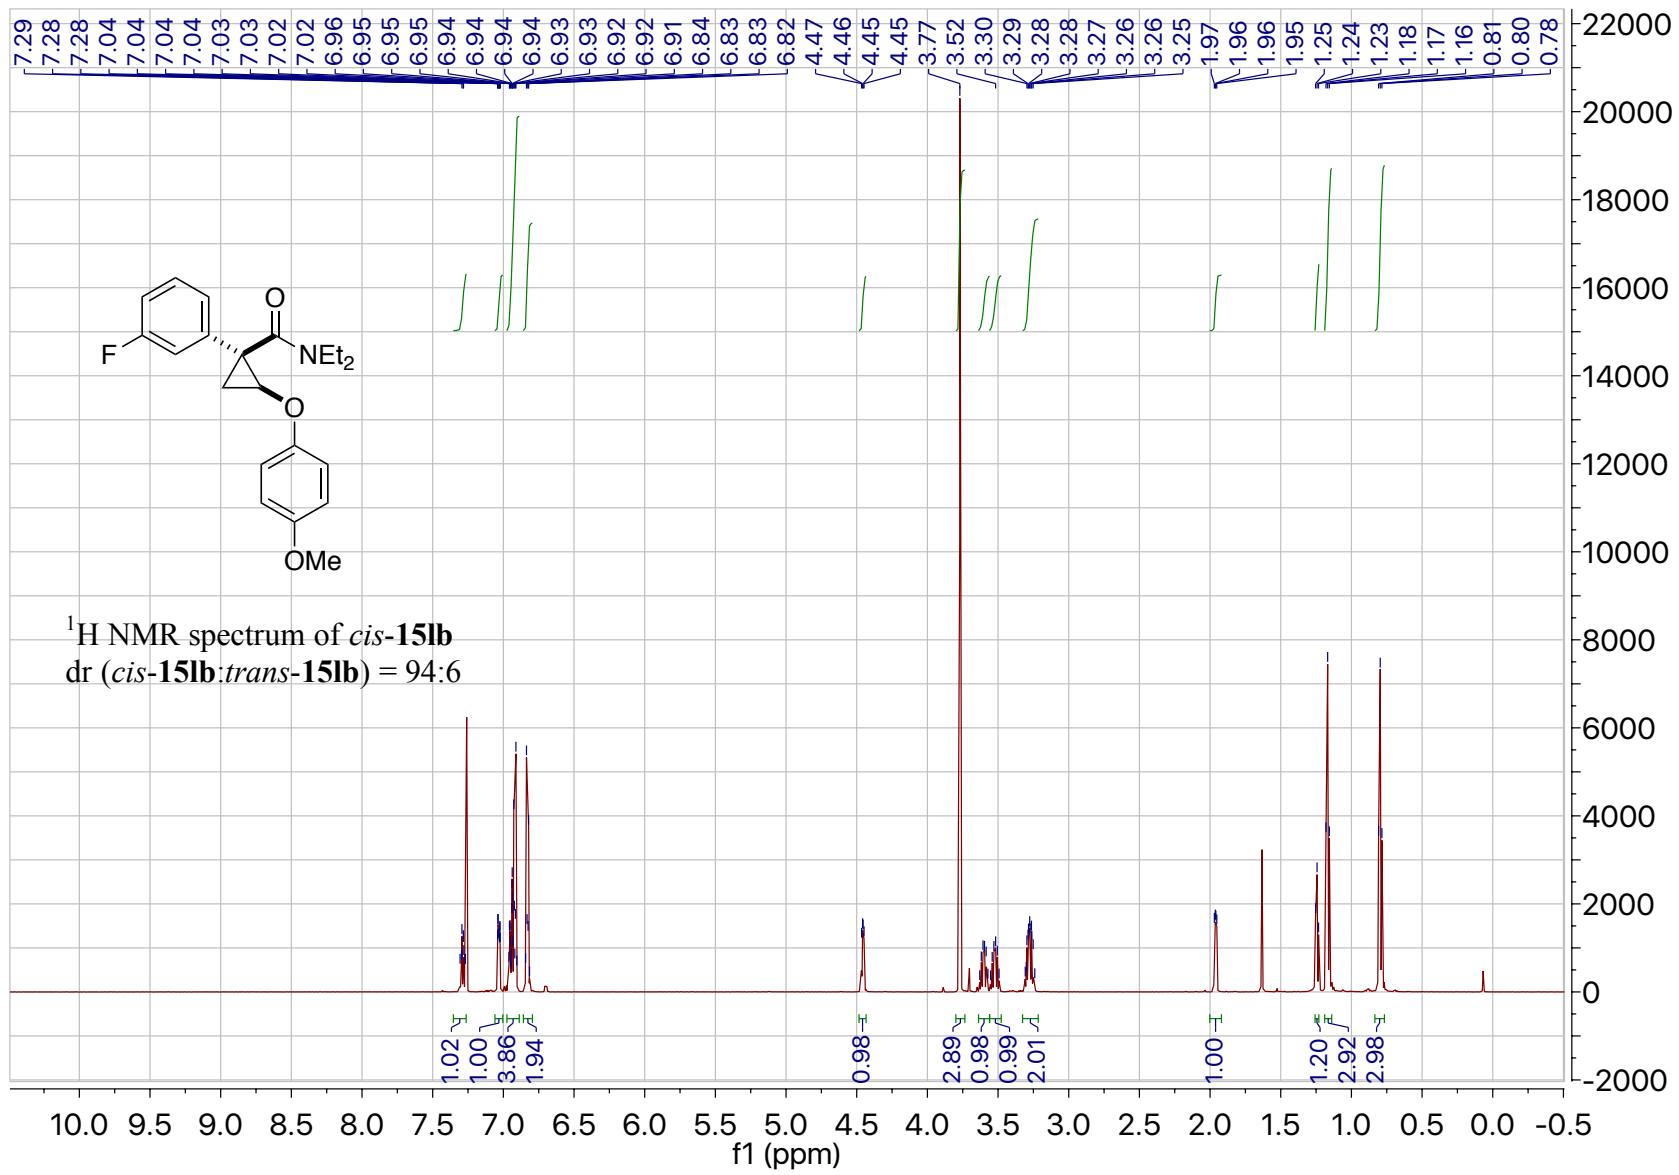

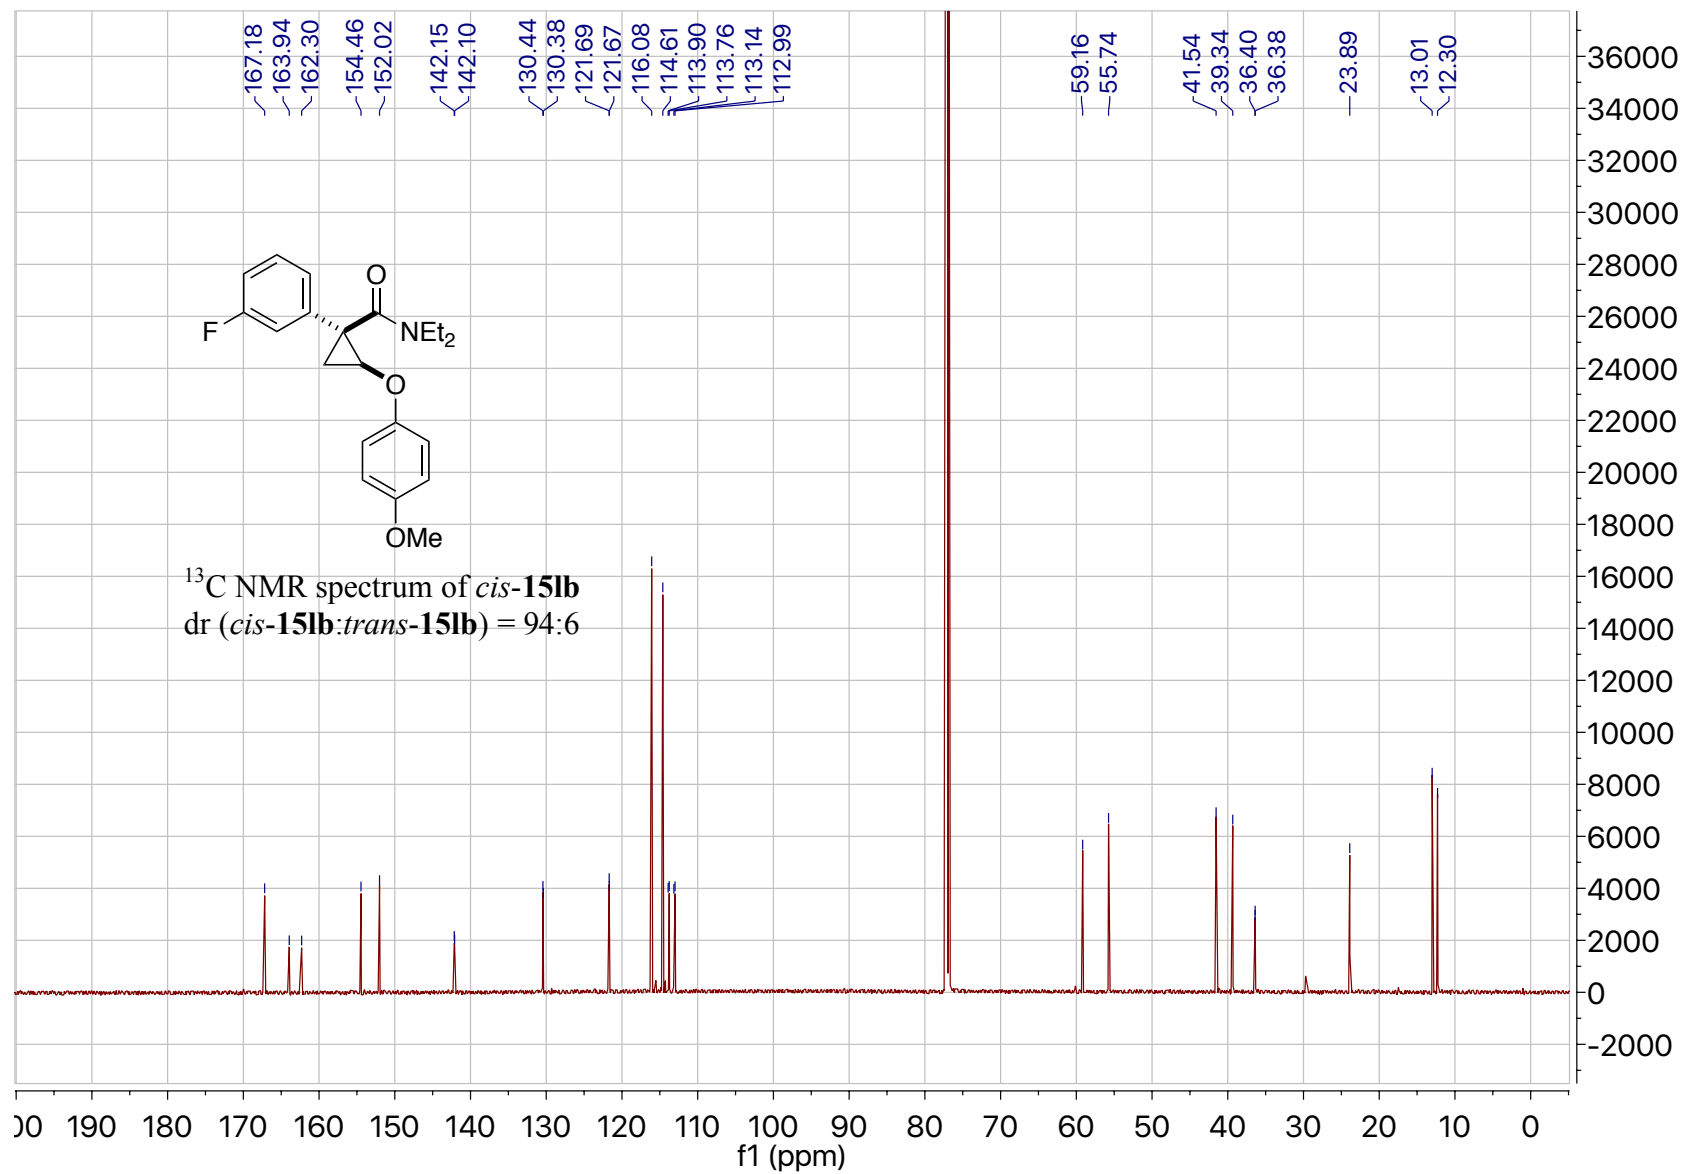

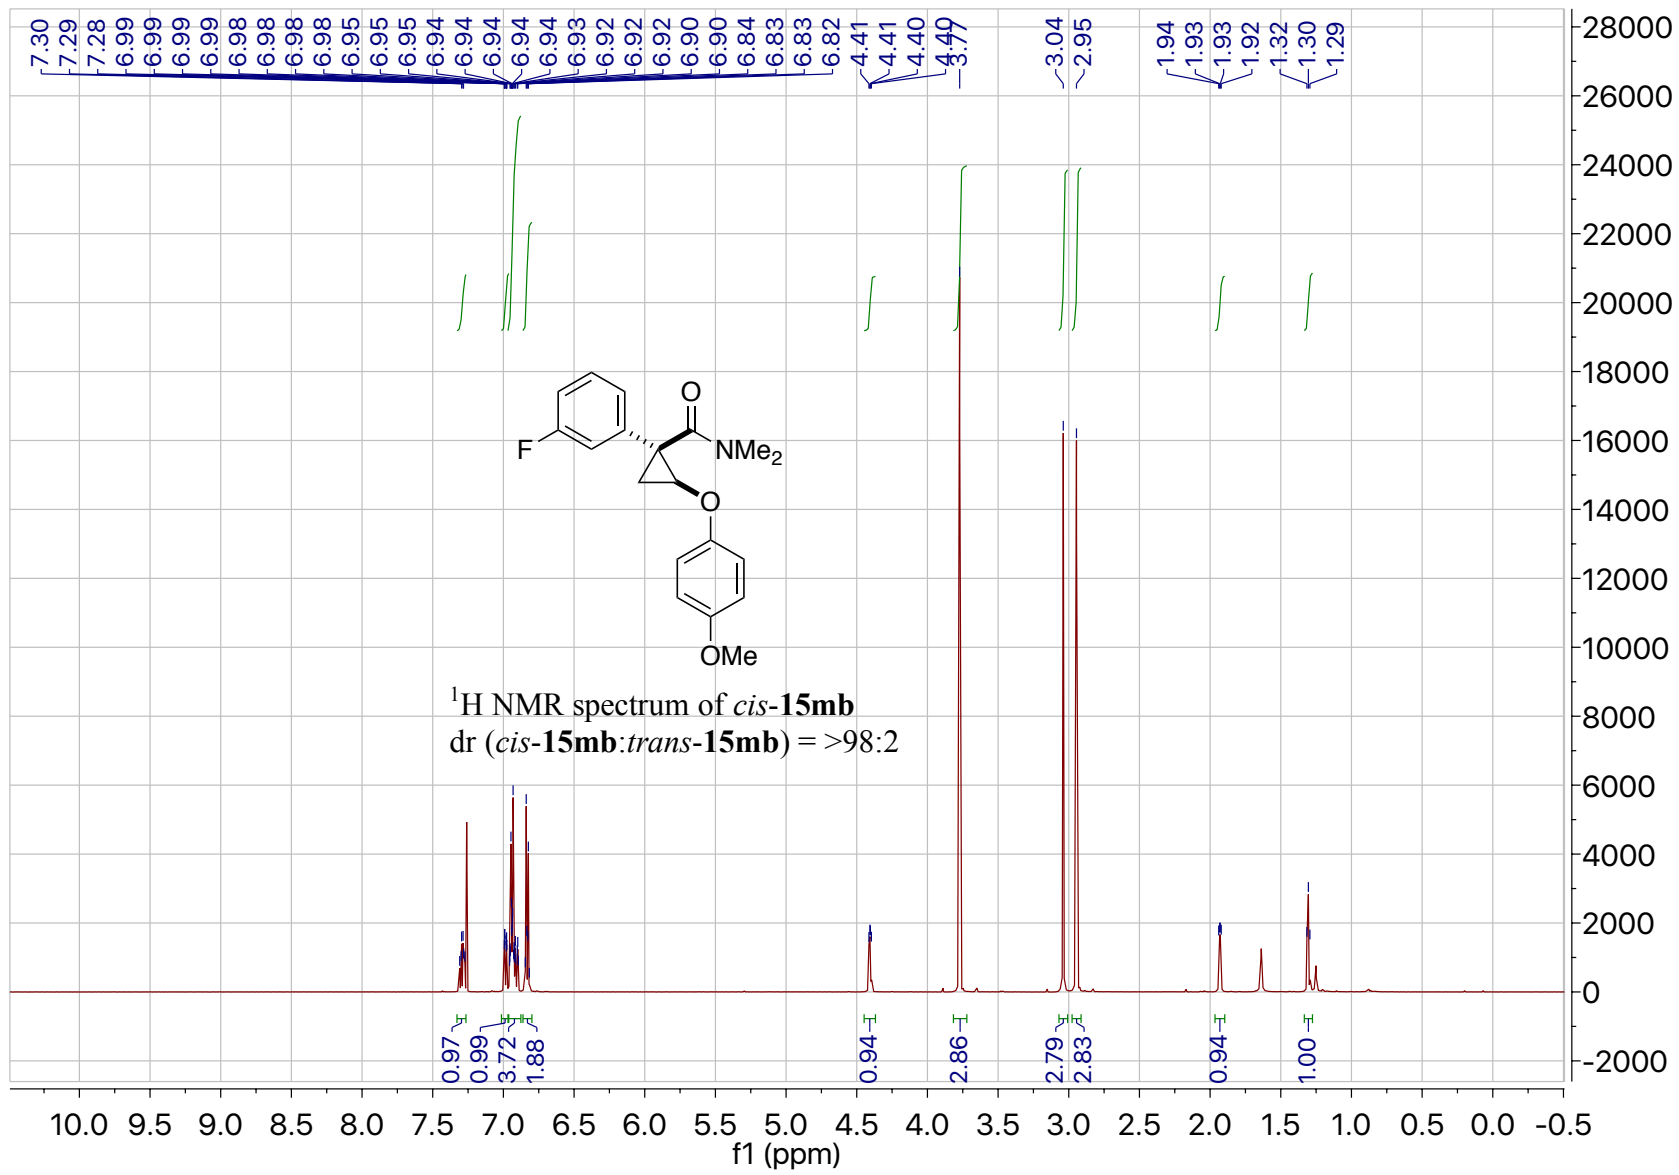



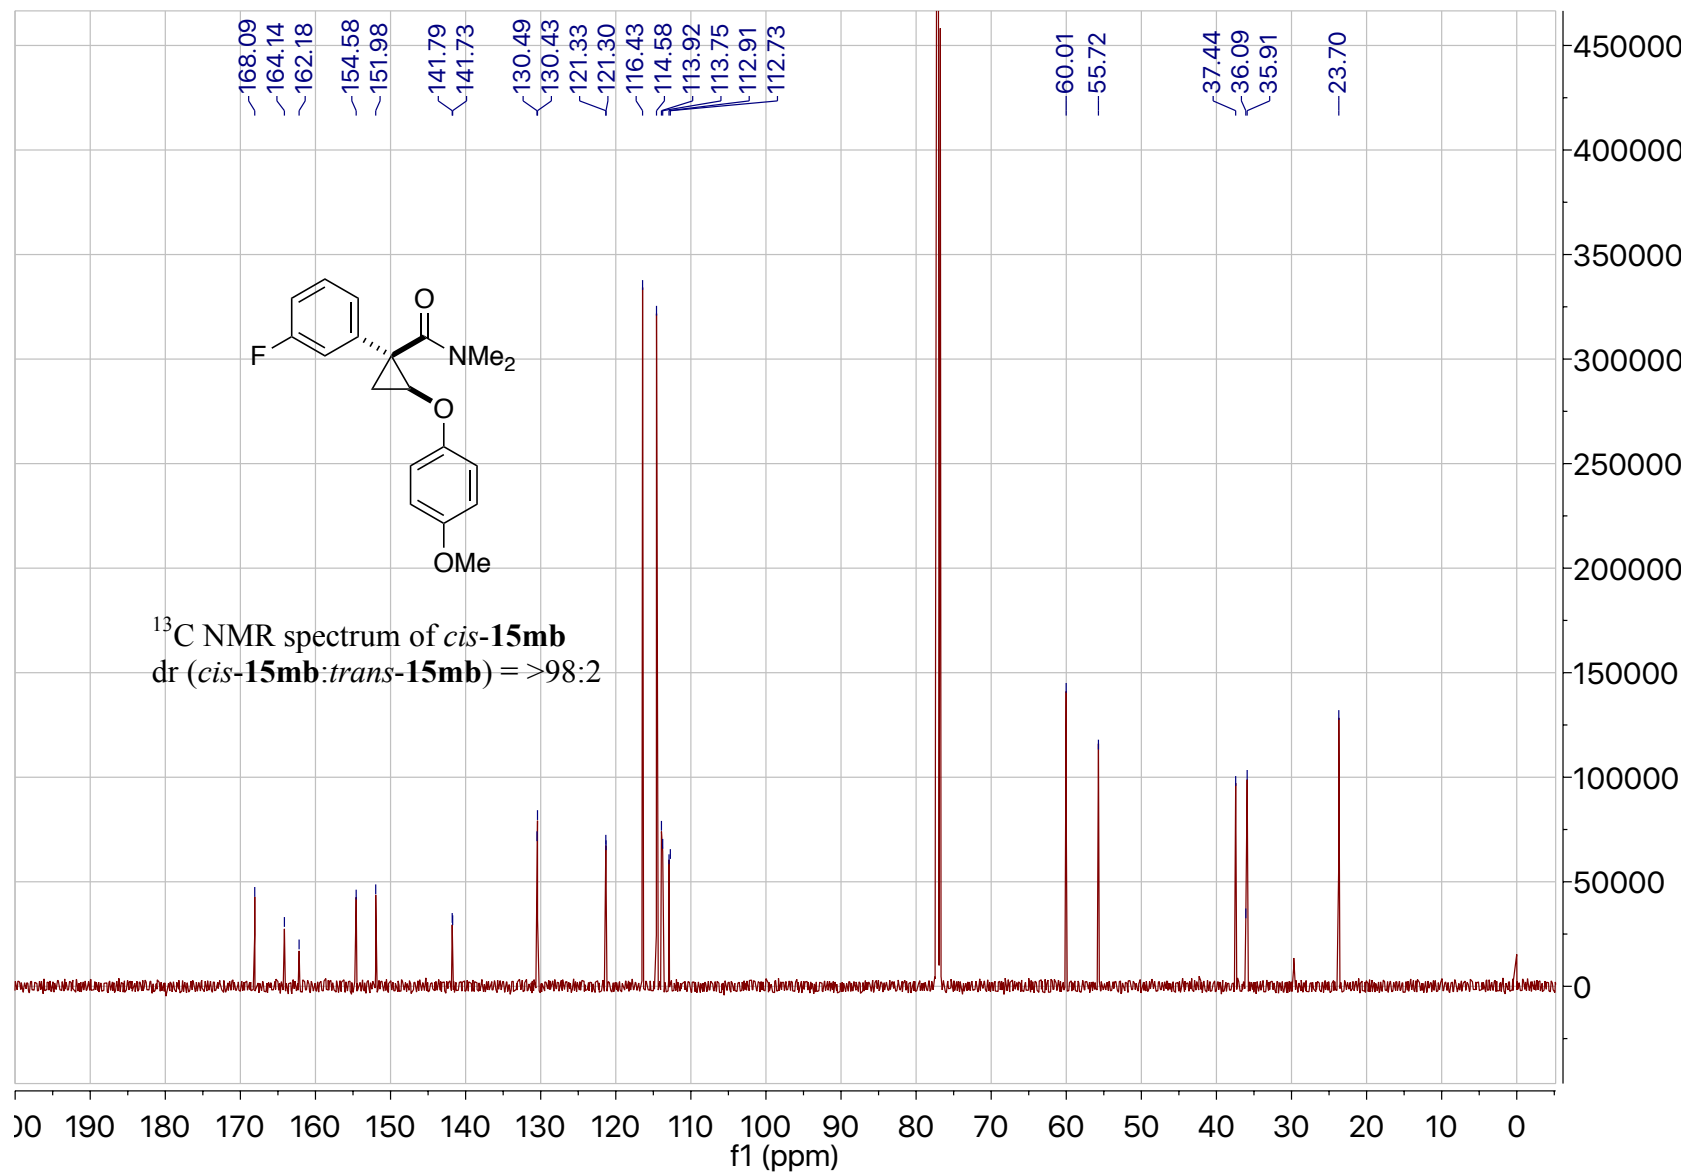

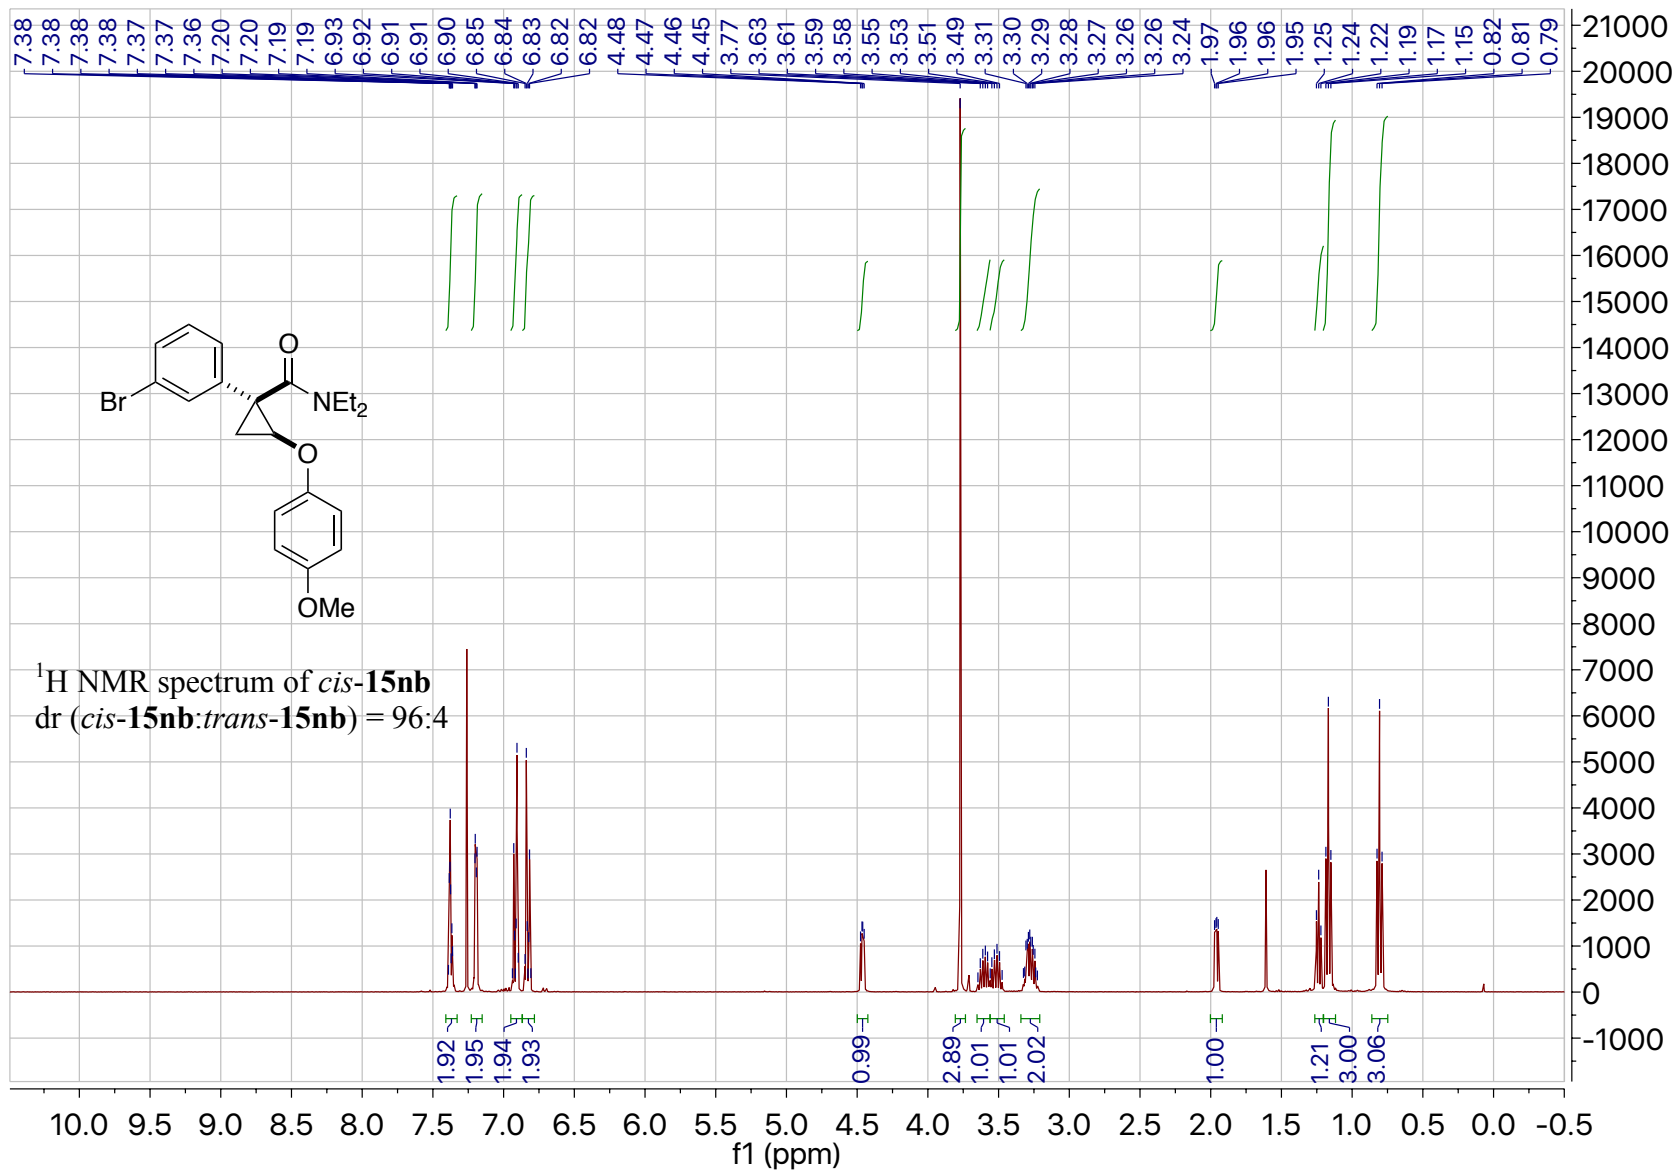

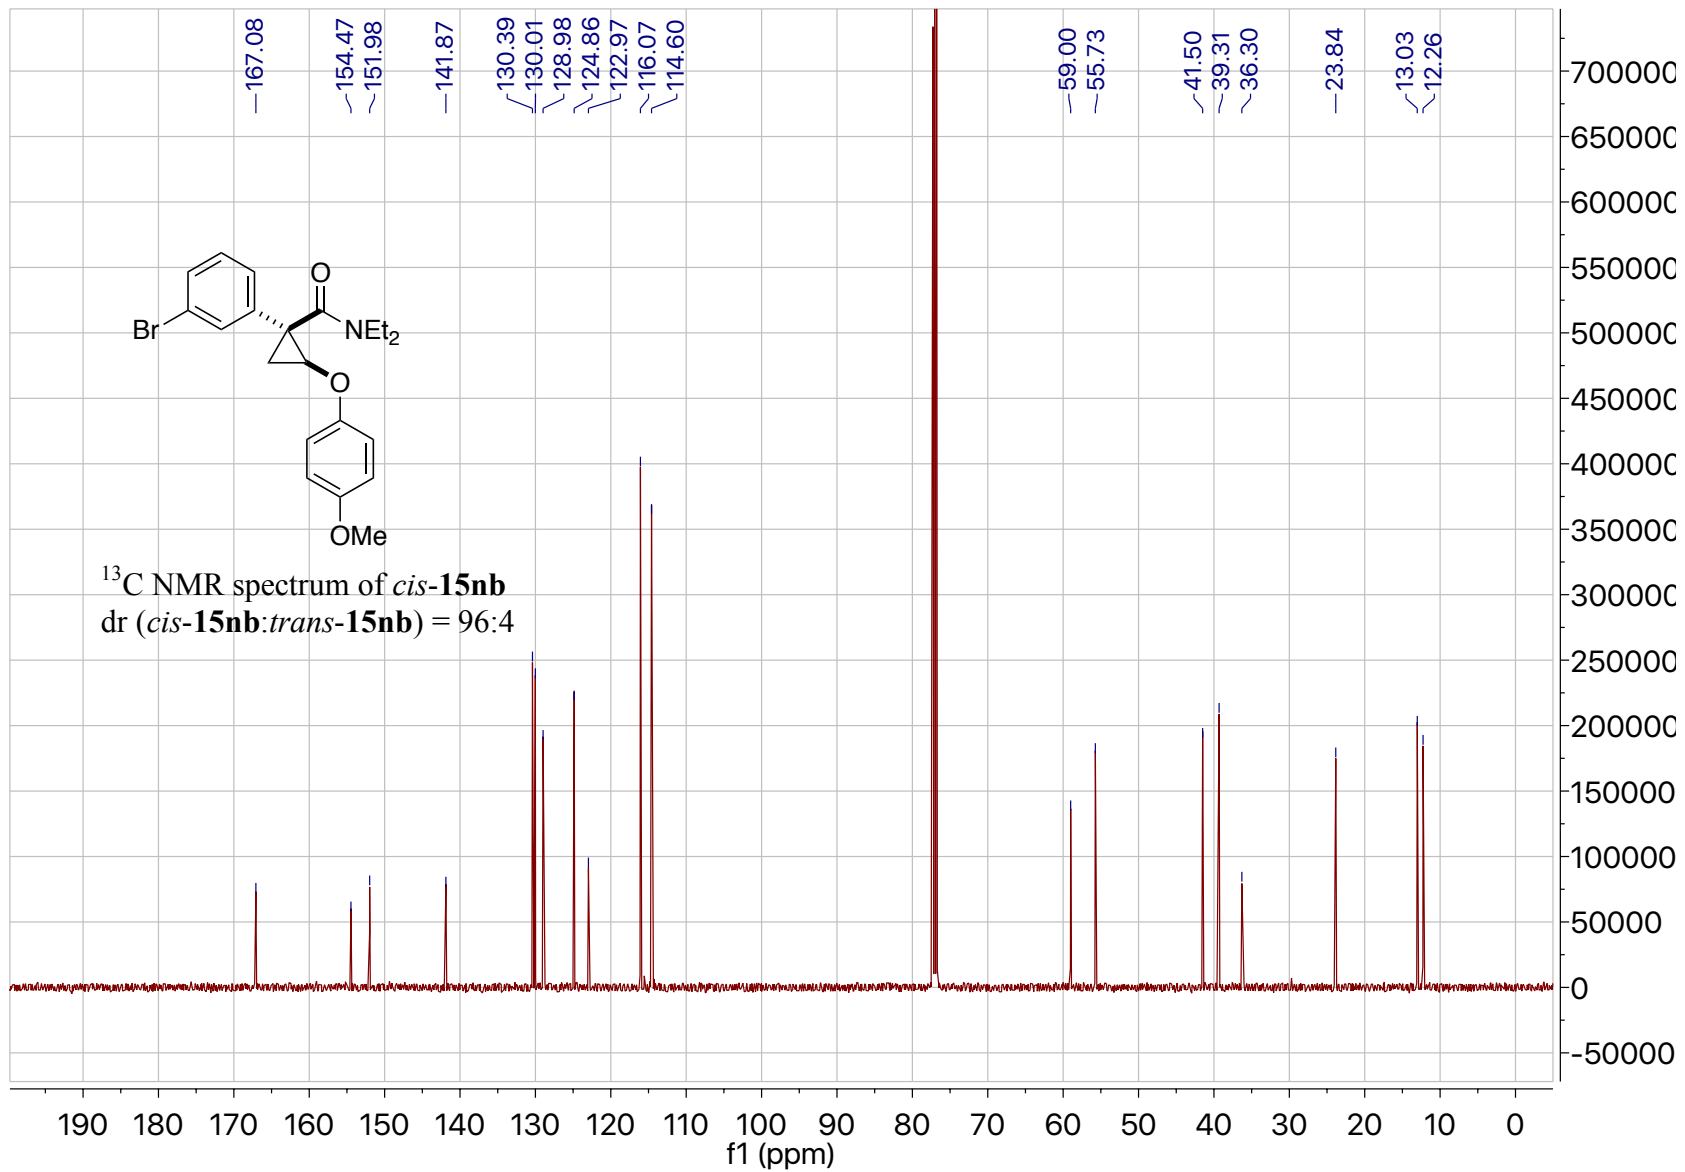

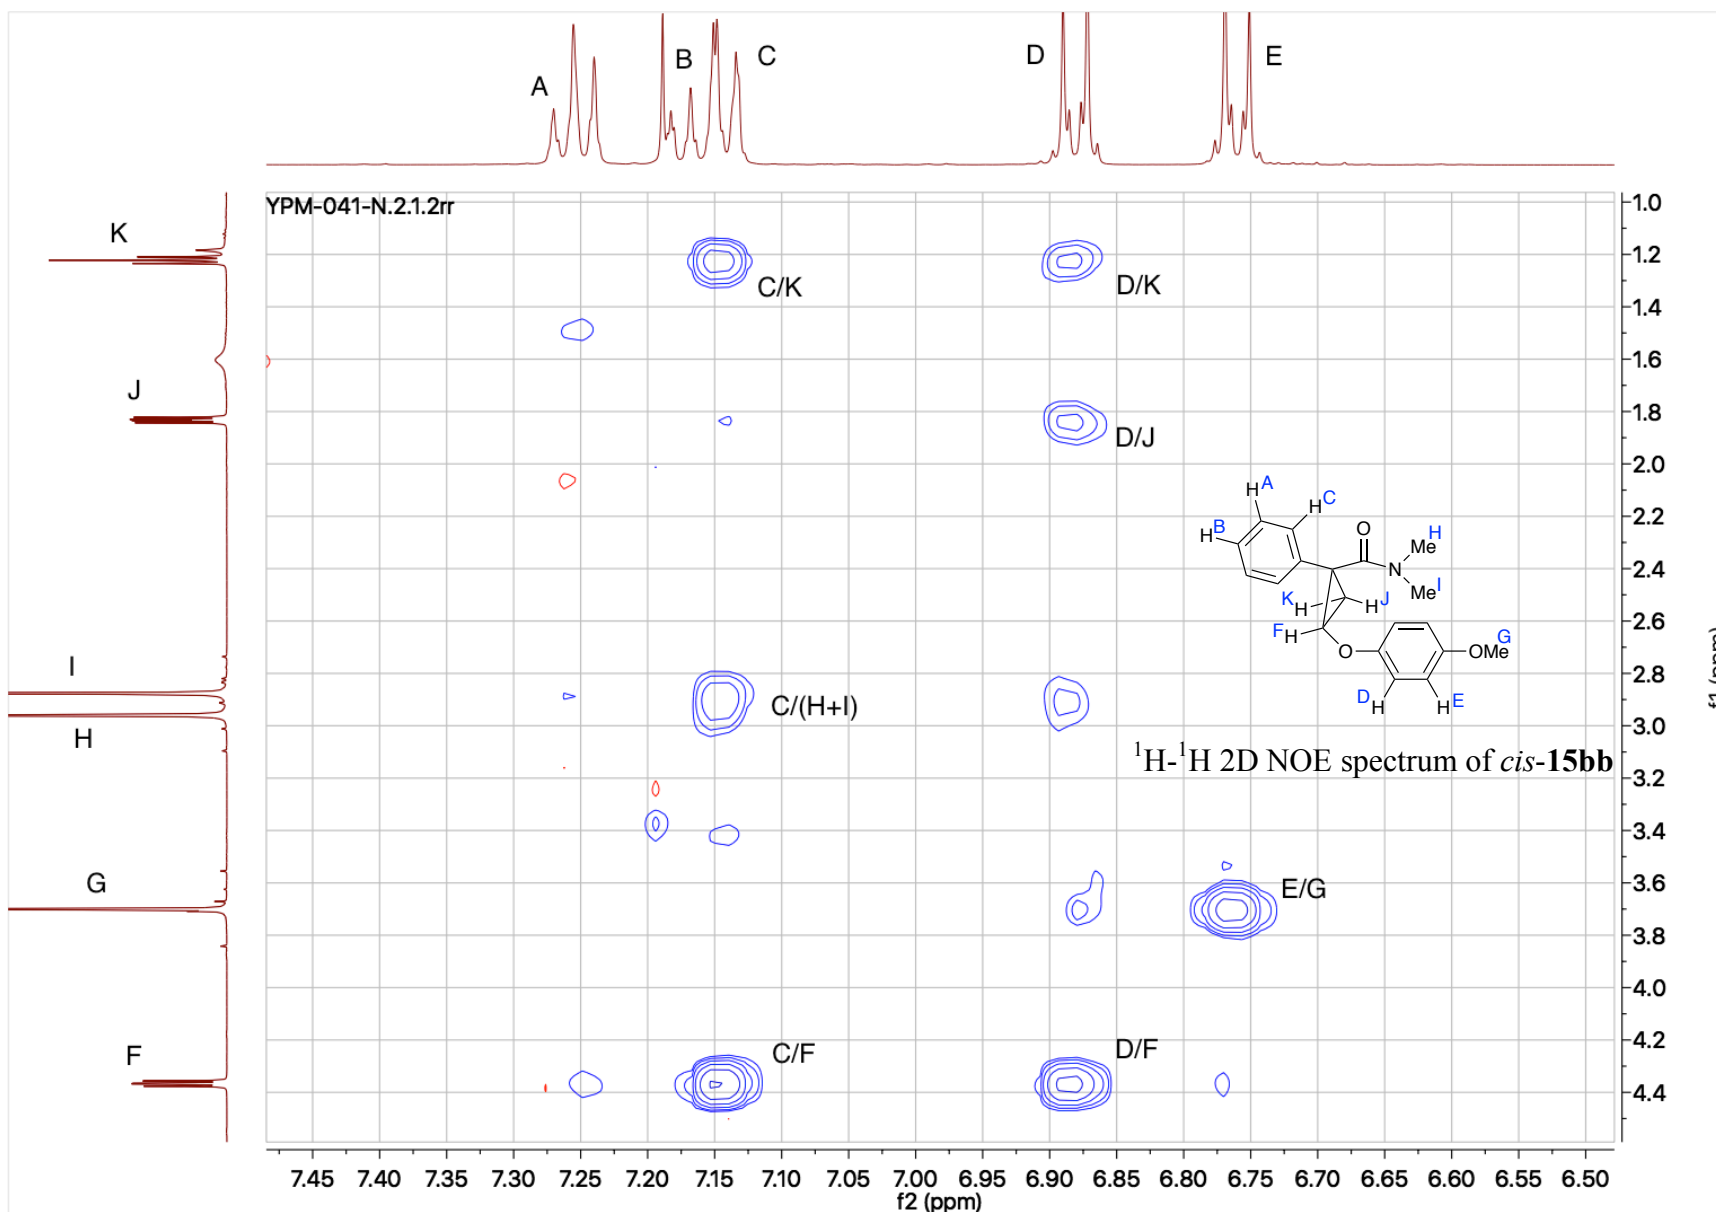

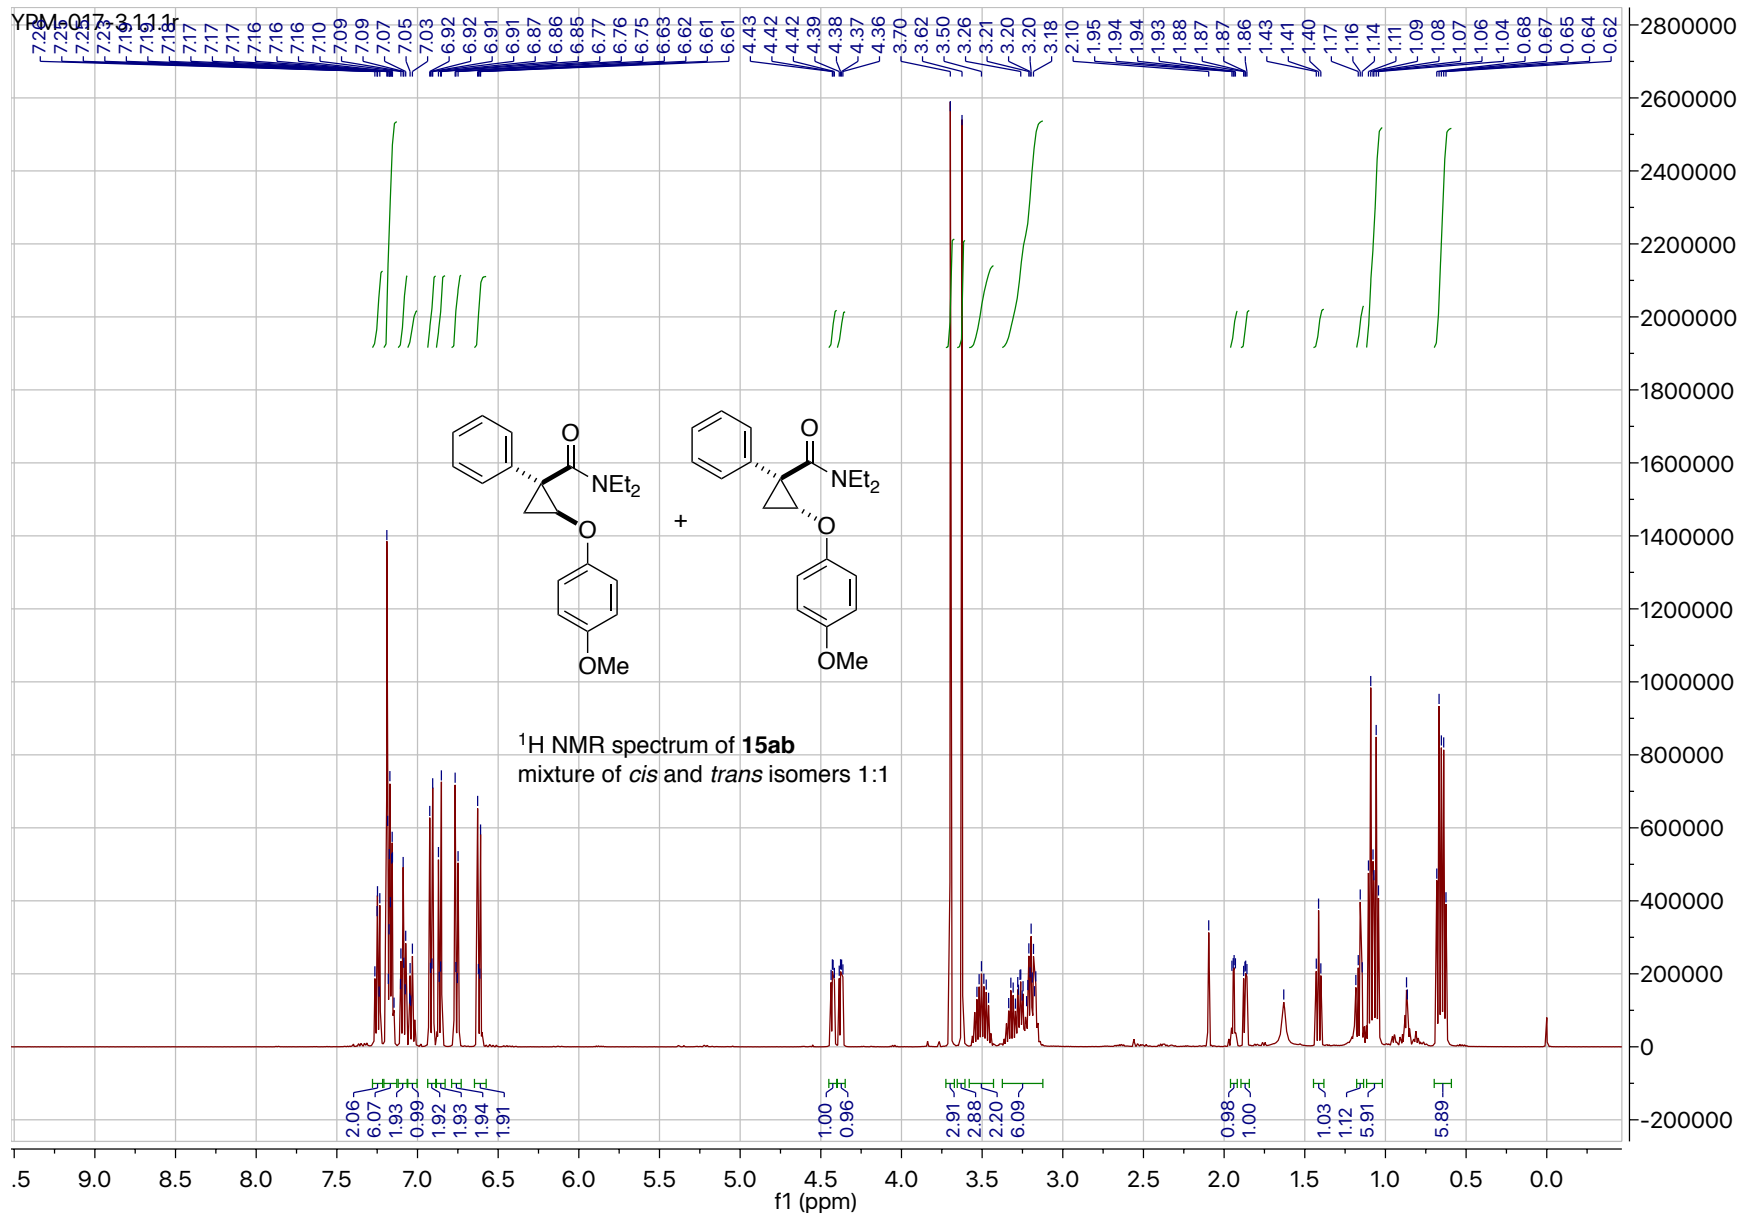





**Preparation of 15ab as a mixture of *cis*- and *trans*-isomers (1:1) used in  $^1\text{H}$ - $^1\text{H}$  2D NOESY studies (see pages S61-S63).**

An oven dried round bottom flask was flushed with nitrogen and charged with *N,N*-diethyl-1-phenylcycloprop-2-ene-1-carboxamide (50 mg, 0.232 mmol) , 4-methoxyphenol (37 mg, 0.301 mmol), potassium hydroxide (19 mg, 0.348 mmol) and freshly distilled DMSO (1.0 mL). Reaction mixture was stirred overnight (c.a. 15 h) at 90 °C under nitrogen atmosphere. When the reaction was complete (controlled by GC) reaction mixture was poured on ice and extracted with EtOAc, organic layer was washed with water three times and then with 3M KOH solution another three times, dried over  $\text{MgSO}_4$  and concentrated under reduced pressure. Resulted brown oil was fractioned on silica gel to afford 24.1 mg (31% yield) diastereomeric mixture of desired compound.



# X-Ray studies of 15db

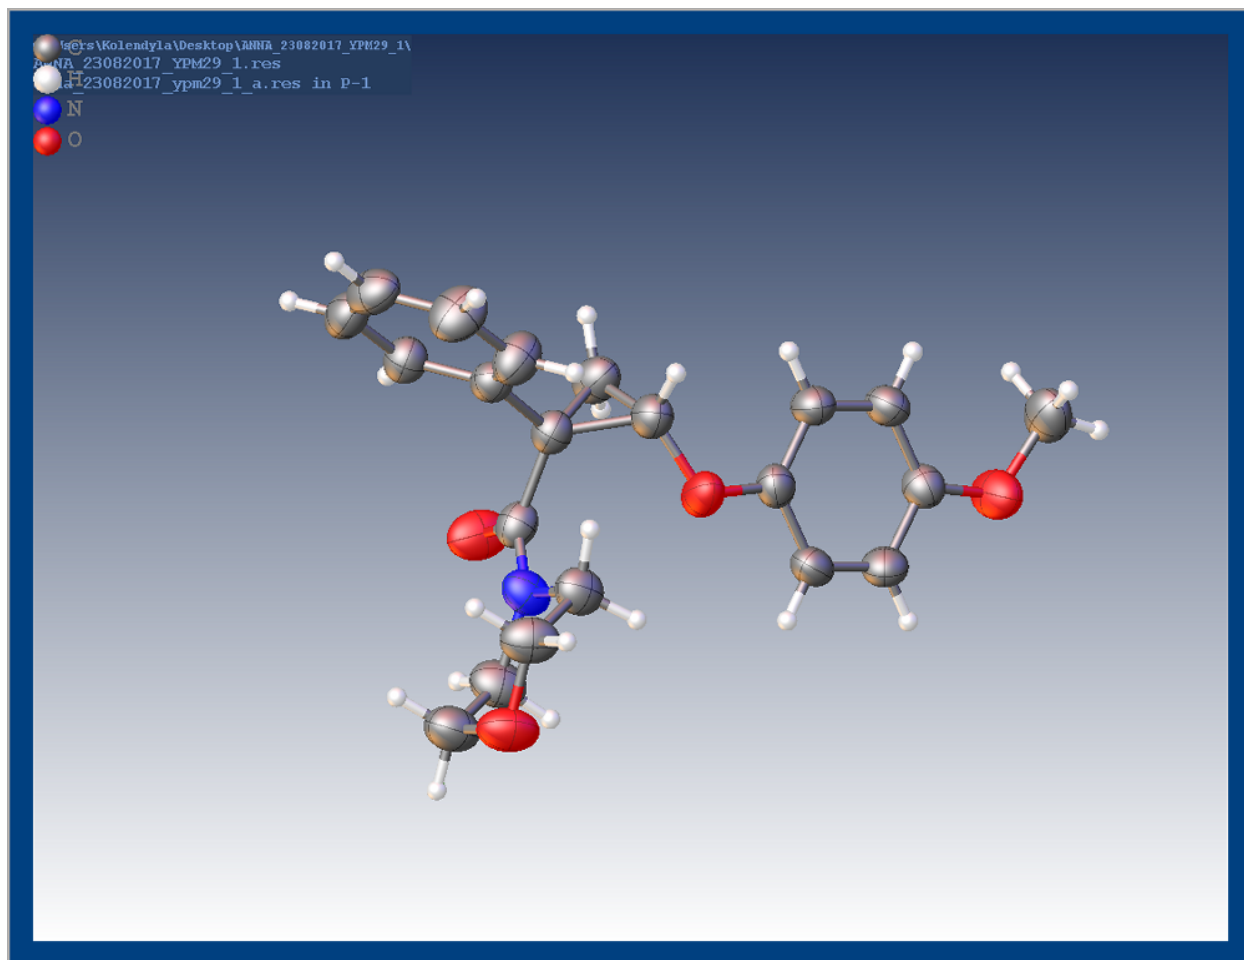

Table 1 Crystal data and structure refinement for *cis*-15db.

|                                             |                                                               |
|---------------------------------------------|---------------------------------------------------------------|
| Identification code                         | ANNA_23082017_YPM29_1                                         |
| Empirical formula                           | C <sub>21</sub> H <sub>23</sub> NO <sub>4</sub>               |
| Formula weight                              | 353.40                                                        |
| Temperature/K                               | 293(2)                                                        |
| Crystal system                              | triclinic                                                     |
| Space group                                 | P-1                                                           |
| a/Å                                         | 9.4667(5)                                                     |
| b/Å                                         | 10.5554(6)                                                    |
| c/Å                                         | 10.6002(6)                                                    |
| α/°                                         | 62.334(6)                                                     |
| β/°                                         | 83.248(5)                                                     |
| γ/°                                         | 79.062(5)                                                     |
| Volume/Å <sup>3</sup>                       | 920.55(10)                                                    |
| Z                                           | 2                                                             |
| ρ <sub>calc</sub> /g/cm <sup>3</sup>        | 1.275                                                         |
| μ/mm <sup>-1</sup>                          | 0.715                                                         |
| F(000)                                      | 376.0                                                         |
| Crystal size/mm <sup>3</sup>                | 0.562 × 0.3 × 0.247                                           |
| Radiation                                   | CuKα (λ = 1.54184)                                            |
| 2θ range for data collection/°              | 9.426 to 136.45                                               |
| Index ranges                                | -11 ≤ h ≤ 11, -12 ≤ k ≤ 12, -12 ≤ l ≤ 9                       |
| Reflections collected                       | 8033                                                          |
| Independent reflections                     | 3369 [R <sub>int</sub> = 0.0172, R <sub>sigma</sub> = 0.0176] |
| Data/restraints/parameters                  | 3369/0/237                                                    |
| Goodness-of-fit on F <sup>2</sup>           | 1.055                                                         |
| Final R indexes [I ≥ 2σ(I)]                 | R <sub>1</sub> = 0.0401, wR <sub>2</sub> = 0.1119             |
| Final R indexes [all data]                  | R <sub>1</sub> = 0.0448, wR <sub>2</sub> = 0.1163             |
| Largest diff. peak/hole / e Å <sup>-3</sup> | 0.26/-0.16                                                    |

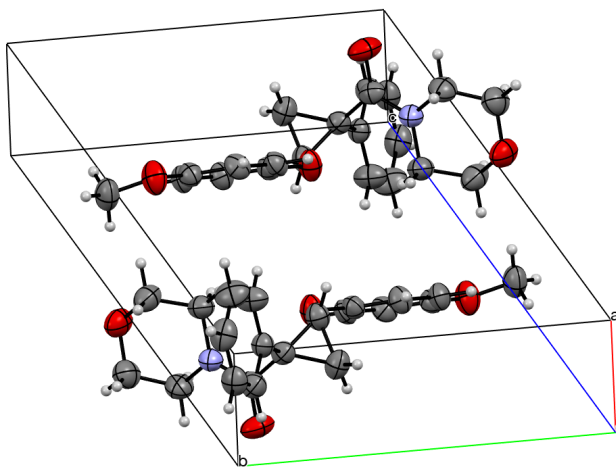

**Table 2 Fractional Atomic Coordinates ( $\times 10^4$ ) and Equivalent Isotropic Displacement Parameters ( $\text{\AA}^2 \times 10^3$ ) for *cis*-15db.  $U_{eq}$  is defined as 1/3 of the trace of the orthogonalised  $U_{ij}$  tensor.**

| Atom | x           | y           | z          | U(eq)   |
|------|-------------|-------------|------------|---------|
| O2   | 5071.9(11)  | 3706.6(11)  | 7169.7(13) | 57.0(3) |
| O3   | 5981.5(14)  | -1147.9(13) | 6711.2(12) | 66.9(3) |
| O4   | 618.9(12)   | 6952.8(13)  | 8734.5(14) | 65.8(3) |
| O1   | 7352.6(14)  | 683.0(14)   | 9756.8(11) | 67.8(4) |
| N1   | 6605.9(15)  | 596.5(13)   | 7871.7(12) | 50.1(3) |
| C4   | 7161.9(15)  | 1257.4(16)  | 8475.0(14) | 45.0(3) |
| C9   | 4042.1(15)  | 4605.0(14)  | 7542.2(15) | 44.6(3) |
| C10  | 2757.2(16)  | 4083.3(15)  | 8095.8(15) | 47.9(3) |
| C16  | 9051.9(15)  | 2634.6(15)  | 6726.5(15) | 43.9(3) |
| C12  | 1801.1(16)  | 6233.5(15)  | 8329.8(15) | 46.8(3) |
| C2   | 7629.8(15)  | 2722.3(15)  | 7506.8(15) | 44.4(3) |
| C17  | 10272.3(16) | 1908.6(16)  | 7520.9(16) | 50.1(4) |
| C13  | 3079.9(16)  | 6759.3(15)  | 7777.2(16) | 49.5(4) |
| C11  | 1650.6(16)  | 4882.2(16)  | 8495.8(16) | 50.5(4) |
| C14  | 4207.0(16)  | 5943.0(15)  | 7382.2(16) | 49.7(4) |
| C1   | 6486.2(16)  | 4027.6(16)  | 6888.6(17) | 51.1(4) |
| C8   | 6181.5(19)  | 1234.3(17)  | 6395.1(15) | 54.4(4) |
| C21  | 9190.3(18)  | 3218(2)     | 5263.0(17) | 62.3(4) |
| C18  | 11600.4(17) | 1775.4(18)  | 6861.7(19) | 57.2(4) |
| C3   | 7307.9(17)  | 3796.9(18)  | 8113.1(18) | 55.9(4) |
| C19  | 11725.3(18) | 2367.8(19)  | 5400.4(19) | 61.8(4) |
| C7   | 6590(2)     | 134.1(19)   | 5844.4(17) | 62.8(4) |
| C5   | 6064(2)     | -776.5(18)  | 8770.2(17) | 62.6(4) |
| C15  | 628(2)      | 8432.4(19)  | 8357(2)    | 67.7(5) |
| C6   | 6481(2)     | -1789.4(19) | 8121.2(19) | 66.5(5) |
| C20  | 10525(2)    | 3082(2)     | 4605.1(19) | 71.1(5) |

**Table 3 Anisotropic Displacement Parameters ( $\text{\AA}^2 \times 10^3$ ) for *cis*-15db. The Anisotropic displacement factor exponent takes the form:  $-2\pi^2[h^2a^{*2}U_{11}+2hka^*b^*U_{12}+\dots]$ .**

| Atom | $U_{11}$ | $U_{22}$ | $U_{33}$ | $U_{23}$ | $U_{13}$ | $U_{12}$ |
|------|----------|----------|----------|----------|----------|----------|
| O2   | 41.4(5)  | 53.9(6)  | 85.7(8)  | -41.3(6) | -3.7(5)  | -2.5(4)  |
| O3   | 85.4(9)  | 65.5(7)  | 59.5(7)  | -28.7(6) | -1.3(6)  | -33.5(6) |
| O4   | 56.7(7)  | 60.0(7)  | 84.2(8)  | -39.8(6) | 17.7(6)  | -9.7(5)  |
| O1   | 79.7(8)  | 85.4(8)  | 37.9(6)  | -19.9(5) | -2.7(5)  | -33.1(7) |
| N1   | 65.4(8)  | 44.0(6)  | 38.8(6)  | -16.0(5) | -3.6(5)  | -9.9(6)  |
| C4   | 38.9(7)  | 54.5(8)  | 39.6(7)  | -20.7(6) | -0.1(5)  | -4.9(6)  |

|     |          |          |          |           |         |           |
|-----|----------|----------|----------|-----------|---------|-----------|
| C9  | 42.7(7)  | 40.5(7)  | 48.2(7)  | -18.9(6)  | -6.9(6) | -1.1(6)   |
| C10 | 51.4(8)  | 35.8(7)  | 52.9(8)  | -15.2(6)  | -5.8(6) | -9.4(6)   |
| C16 | 43.2(7)  | 43.8(7)  | 47.3(7)  | -22.5(6)  | -0.7(6) | -8.2(6)   |
| C12 | 47.8(8)  | 44.6(7)  | 44.8(7)  | -18.7(6)  | 2.1(6)  | -6.2(6)   |
| C2  | 40.7(7)  | 48.8(8)  | 45.5(7)  | -23.3(6)  | -2.5(6) | -4.9(6)   |
| C17 | 47.2(8)  | 53.5(8)  | 51.3(8)  | -25.9(7)  | -3.2(6) | -5.1(6)   |
| C13 | 52.1(8)  | 40.1(7)  | 57.2(8)  | -22.2(6)  | 1.2(7)  | -10.4(6)  |
| C11 | 47.8(8)  | 46.4(8)  | 51.6(8)  | -15.9(6)  | 4.4(6)  | -15.1(6)  |
| C14 | 44.2(8)  | 45.2(7)  | 59.3(9)  | -22.5(7)  | 2.7(6)  | -12.4(6)  |
| C1  | 44.4(8)  | 48.2(8)  | 61.8(9)  | -26.5(7)  | -1.3(6) | -5.3(6)   |
| C8  | 64.1(10) | 52.7(8)  | 43.7(8)  | -17.6(7)  | -8.3(7) | -10.5(7)  |
| C21 | 50.9(9)  | 78.1(11) | 48.2(8)  | -20.7(8)  | -2.2(7) | -9.0(8)   |
| C18 | 42.6(8)  | 60.8(9)  | 73.7(10) | -36.1(8)  | -3.3(7) | -4.8(7)   |
| C3  | 48.3(8)  | 63.6(9)  | 68.9(10) | -41.5(8)  | 0.6(7)  | -8.6(7)   |
| C19 | 48.1(9)  | 71.8(10) | 76.7(11) | -43.6(9)  | 13.8(8) | -17.5(8)  |
| C7  | 77.9(11) | 68.3(10) | 50.6(9)  | -29.2(8)  | 3.5(8)  | -27.9(9)  |
| C5  | 79.4(12) | 56.9(9)  | 46.0(8)  | -15.9(7)  | 3.0(8)  | -21.2(8)  |
| C15 | 61.2(10) | 62.9(10) | 91.2(13) | -48.5(10) | -7.1(9) | 2.5(8)    |
| C6  | 78.6(12) | 53.8(9)  | 65.9(10) | -21.3(8)  | -7.0(9) | -20.9(8)  |
| C20 | 63.2(11) | 94.4(14) | 51.6(9)  | -29.9(9)  | 12.0(8) | -20.4(10) |

**Table 4 Bond Lengths for *cis*-15db.**

| Atom | Atom | Length/Å   | Atom | Atom | Length/Å |
|------|------|------------|------|------|----------|
| O2   | C9   | 1.3827(17) | C16  | C17  | 1.387(2) |
| O2   | C1   | 1.4073(18) | C16  | C21  | 1.378(2) |
| O3   | C7   | 1.4227(19) | C12  | C13  | 1.380(2) |
| O3   | C6   | 1.422(2)   | C12  | C11  | 1.387(2) |
| O4   | C12  | 1.3712(18) | C2   | C1   | 1.504(2) |
| O4   | C15  | 1.422(2)   | C2   | C3   | 1.514(2) |
| O1   | C4   | 1.2238(17) | C17  | C18  | 1.381(2) |
| N1   | C4   | 1.3436(19) | C13  | C14  | 1.392(2) |
| N1   | C8   | 1.4599(18) | C1   | C3   | 1.490(2) |
| N1   | C5   | 1.468(2)   | C8   | C7   | 1.498(2) |
| C4   | C2   | 1.523(2)   | C21  | C20  | 1.385(2) |
| C9   | C10  | 1.383(2)   | C18  | C19  | 1.375(2) |
| C9   | C14  | 1.379(2)   | C19  | C20  | 1.371(3) |
| C10  | C11  | 1.371(2)   | C5   | C6   | 1.494(2) |
| C16  | C2   | 1.5056(19) |      |      |          |

**Table 5 Bond Angles for *cis*-15db.**

| Atom | Atom | Atom | Angle/°    | Atom | Atom | Atom | Angle/°    |
|------|------|------|------------|------|------|------|------------|
| C9   | O2   | C1   | 117.42(11) | C1   | C2   | C4   | 118.44(12) |
| C6   | O3   | C7   | 110.00(12) | C1   | C2   | C16  | 121.15(12) |
| C12  | O4   | C15  | 117.38(13) | C1   | C2   | C3   | 59.18(10)  |
| C4   | N1   | C8   | 126.36(12) | C3   | C2   | C4   | 114.50(12) |
| C4   | N1   | C5   | 119.98(12) | C18  | C17  | C16  | 120.82(14) |
| C8   | N1   | C5   | 112.35(13) | C12  | C13  | C14  | 120.22(13) |
| O1   | C4   | N1   | 121.62(14) | C10  | C11  | C12  | 120.27(13) |
| O1   | C4   | C2   | 120.16(13) | C9   | C14  | C13  | 119.81(13) |
| N1   | C4   | C2   | 118.14(12) | O2   | C1   | C2   | 114.15(12) |
| O2   | C9   | C10  | 115.13(12) | O2   | C1   | C3   | 117.71(14) |
| C14  | C9   | O2   | 125.14(13) | C3   | C1   | C2   | 60.74(10)  |
| C14  | C9   | C10  | 119.73(13) | N1   | C8   | C7   | 109.56(13) |
| C11  | C10  | C9   | 120.47(13) | C16  | C21  | C20  | 120.39(16) |
| C17  | C16  | C2   | 118.38(12) | C19  | C18  | C17  | 119.99(15) |
| C21  | C16  | C2   | 122.98(13) | C1   | C3   | C2   | 60.07(10)  |
| C21  | C16  | C17  | 118.63(14) | C20  | C19  | C18  | 119.67(15) |
| O4   | C12  | C13  | 125.04(13) | O3   | C7   | C8   | 111.83(13) |
| O4   | C12  | C11  | 115.47(13) | N1   | C5   | C6   | 110.37(13) |
| C13  | C12  | C11  | 119.48(13) | O3   | C6   | C5   | 110.94(14) |
| C16  | C2   | C4   | 114.04(12) | C19  | C20  | C21  | 120.50(16) |
| C16  | C2   | C3   | 118.38(12) |      |      |      |            |

**Table 6 Hydrogen Atom Coordinates ( $\text{\AA} \times 10^4$ ) and Isotropic Displacement Parameters ( $\text{\AA}^2 \times 10^3$ ) for *cis*-15db.**

| Atom | <i>x</i> | <i>y</i> | <i>z</i> | U(eq) |
|------|----------|----------|----------|-------|
| H10  | 2642.9   | 3184.41  | 8197.44  | 57    |
| H17  | 10194.92 | 1506.54  | 8509.79  | 60    |
| H13  | 3189.3   | 7662.29  | 7668.18  | 59    |
| H11  | 795.68   | 4516.45  | 8879.96  | 61    |
| H14  | 5068.86  | 6298.63  | 7011.35  | 60    |
| H1   | 6698.57  | 4808.52  | 5952.89  | 61    |
| H8A  | 6657.62  | 2069.58  | 5814.8   | 65    |
| H8B  | 5149.96  | 1553.7   | 6340.59  | 65    |
| H21  | 8383.21  | 3705.45  | 4713.57  | 75    |
| H18  | 12410.3  | 1284.9   | 7406.14  | 69    |
| H3A  | 6810.24  | 3499.29  | 9036.47  | 67    |
| H3B  | 8009.9   | 4429.18  | 7926.55  | 67    |
| H19  | 12619.58 | 2284.92  | 4953.39  | 74    |

|      |          |          |         |     |
|------|----------|----------|---------|-----|
| H7A  | 6262.93  | 547.09   | 4879.72 | 75  |
| H7B  | 7630.22  | -109.05  | 5814.51 | 75  |
| H5A  | 5024.03  | -594.48  | 8873.09 | 75  |
| H5B  | 6458.32  | -1214.77 | 9710.74 | 75  |
| H15A | 756.08   | 8964.75  | 7341.66 | 102 |
| H15B | 1403.64  | 8506.62  | 8814.17 | 102 |
| H15C | -269.74  | 8824.42  | 8658.62 | 102 |
| H6A  | 7520.44  | -2042.82 | 8102.84 | 80  |
| H6B  | 6074.87  | -2671.5  | 8700.04 | 80  |
| H20  | 10606.75 | 3477.48  | 3616.78 | 85  |

## Experimental

Single crystals of  $C_{21}H_{23}NO_4$  (**15db**) were obtained via crystallization of the material purified by column chromatography. This material was dissolved in a mixture of hexane and diethyl ether, and ether was allowed to evaporate slowly at room temperature. A suitable crystal was selected and analyzed on a SuperNova, Dual, Cu at zero, AtlasS2 diffractometer. The crystal was kept at 293(2) K during data collection. The structure was solved with the ShelXT [1] structure solution program under Olex2 interface [2], using Intrinsic Phasing and refined with the ShelXL [1] refinement package using Least Squares minimization.

1. Sheldrick, G.M. (2015). Acta Cryst. A71, 3-8.
2. Dolomanov, O.V., Bourhis, L.J., Gildea, R.J, Howard, J.A.K. & Puschmann, H. (2009), J. Appl. Cryst. 42, 339-341.

## Crystal structure determination of *cis*-15db

**Crystal Data** for  $C_{21}H_{23}NO_4$  ( $M = 353.40$  g/mol): triclinic, space group P-1 (no. 2),  $a = 9.4667(5)$  Å,  $b = 10.5554(6)$  Å,  $c = 10.6002(6)$  Å,  $\alpha = 62.334(6)^\circ$ ,  $\beta = 83.248(5)^\circ$ ,  $\gamma = 79.062(5)^\circ$ ,  $V = 920.55(10)$  Å<sup>3</sup>,  $Z = 2$ ,  $T = 293(2)$  K,  $\mu(\text{CuK}\alpha) = 0.715$  mm<sup>-1</sup>,  $D_{\text{calc}} = 1.275$  g/cm<sup>3</sup>, 8033 reflections measured ( $9.426^\circ \leq 2\theta \leq 136.45^\circ$ ), 3369 unique ( $R_{\text{int}} = 0.0172$ ,  $R_{\text{sigma}} = 0.0176$ ) which were used in all calculations. The final  $R_1$  was 0.0401 ( $I > 2\sigma(I)$ ) and  $wR_2$  was 0.1163 (all data).

## Refinement model description

Number of restraints - 0, number of constraints - unknown.

### Details:

1. Fixed Uiso
  - At 1.2 times of:
    - All C(H) groups, All C(H,H) groups
  - At 1.5 times of:
    - All C(H,H,H) groups
- 2.a Ternary CH refined with riding coordinates:
  - C1(H1)
- 2.b Secondary CH2 refined with riding coordinates:
  - C8(H8A,H8B), C3(H3A,H3B), C7(H7A,H7B), C5(H5A,H5B), C6(H6A,H6B)
- 2.c Aromatic/amide H refined with riding coordinates:
  - C10(H10), C17(H17), C13(H13), C11(H11), C14(H14), C21(H21), C18(H18), C19(H19), C20(H20)
- 2.d Idealised Me refined as rotating group:
  - C15(H15A,H15B,H15C)

This report has been created with Olex2, compiled on 2017.03.28 svn.r3405 for OlexSys.

# X-Ray studies of 15cb

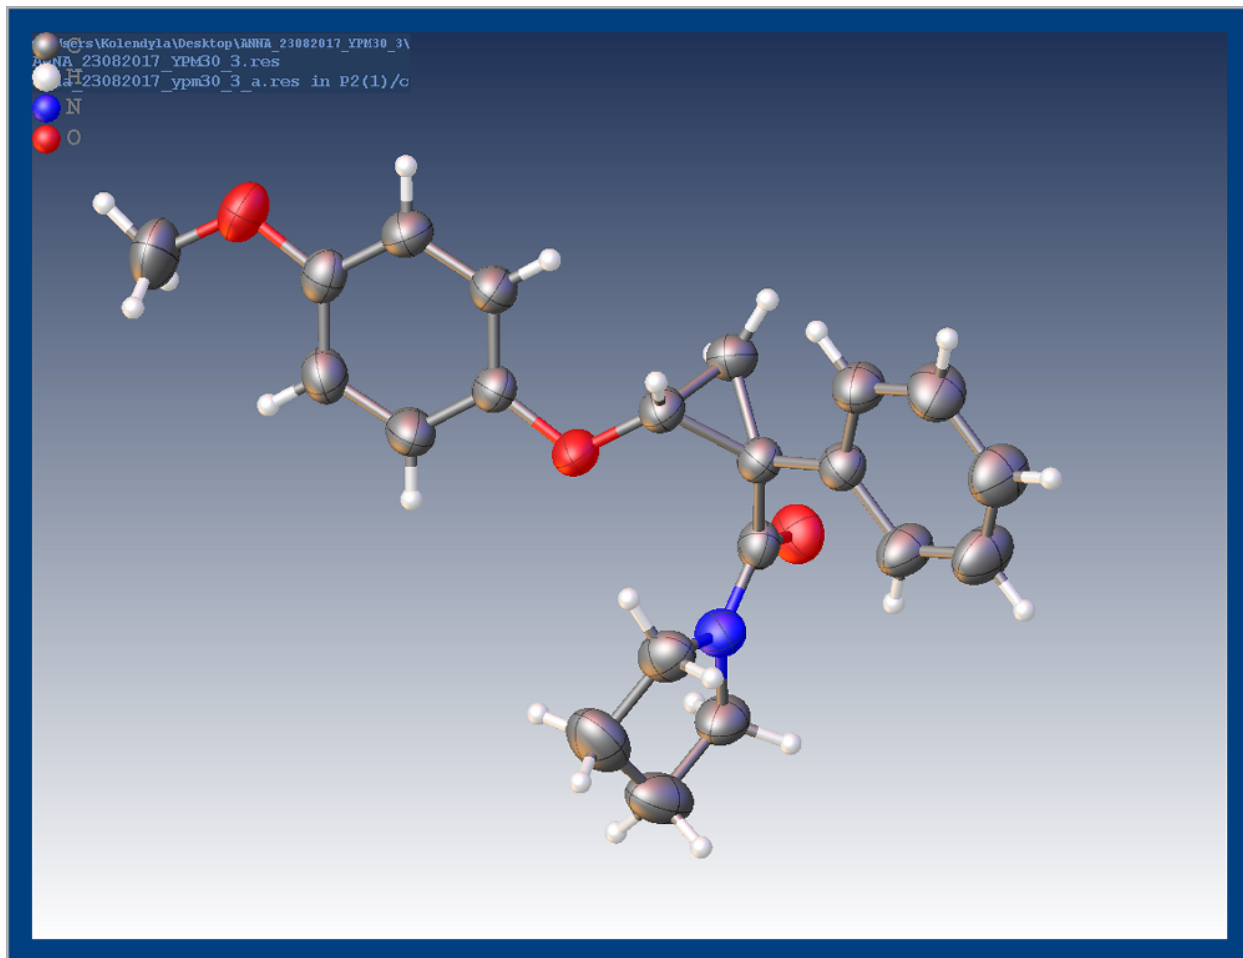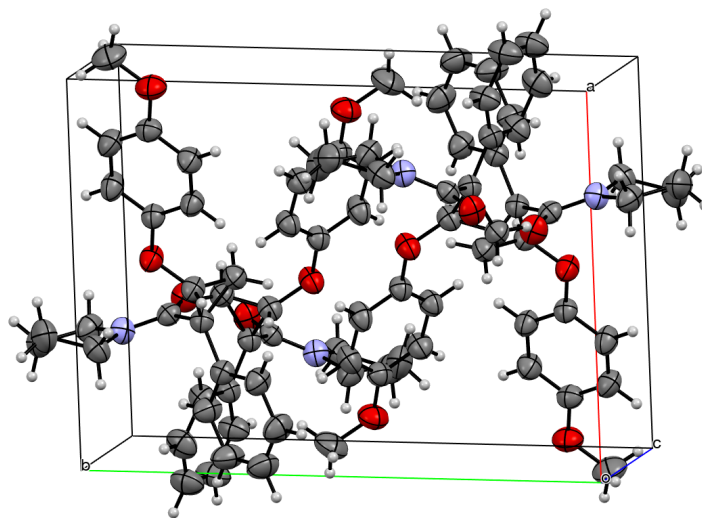

**Table 7. Crystal data and structure refinement for 15cb.**

|                                             |                                                               |
|---------------------------------------------|---------------------------------------------------------------|
| Identification code                         | ANNA_23082017_YPM30_3                                         |
| Empirical formula                           | C <sub>21</sub> H <sub>23</sub> NO <sub>3</sub>               |
| Formula weight                              | 337.40                                                        |
| Temperature/K                               | 293(2)                                                        |
| Crystal system                              | monoclinic                                                    |
| Space group                                 | P2 <sub>1</sub> /c                                            |
| a/Å                                         | 11.9367(4)                                                    |
| b/Å                                         | 14.2449(4)                                                    |
| c/Å                                         | 11.4918(3)                                                    |
| α/°                                         | 90                                                            |
| β/°                                         | 112.287(4)                                                    |
| γ/°                                         | 90                                                            |
| Volume/Å <sup>3</sup>                       | 1808.07(10)                                                   |
| Z                                           | 4                                                             |
| ρ <sub>calc</sub> /g/cm <sup>3</sup>        | 1.239                                                         |
| μ/mm <sup>-1</sup>                          | 0.661                                                         |
| F(000)                                      | 720.0                                                         |
| Crystal size/mm <sup>3</sup>                | 0.44 × 0.32 × 0.23                                            |
| Radiation                                   | CuKα (λ = 1.54184)                                            |
| 2θ range for data collection/°              | 8.004 to 136.496                                              |
| Index ranges                                | -14 ≤ h ≤ 13, -17 ≤ k ≤ 17, -13 ≤ l ≤ 11                      |
| Reflections collected                       | 11506                                                         |
| Independent reflections                     | 3304 [R <sub>int</sub> = 0.0411, R <sub>sigma</sub> = 0.0263] |
| Data/restraints/parameters                  | 3304/0/215                                                    |
| Goodness-of-fit on F <sup>2</sup>           | 1.063                                                         |
| Final R indexes [I ≥ 2σ (I)]                | R <sub>1</sub> = 0.0592, wR <sub>2</sub> = 0.1653             |
| Final R indexes [all data]                  | R <sub>1</sub> = 0.0632, wR <sub>2</sub> = 0.1717             |
| Largest diff. peak/hole / e Å <sup>-3</sup> | 0.30/-0.32                                                    |



**Table 8. Fractional Atomic Coordinates ( $\times 10^4$ ) and Equivalent Isotropic Displacement Parameters ( $\text{\AA}^2 \times 10^3$ ) for 15cb.  $U_{\text{eq}}$  is defined as 1/3 of the trace of the orthogonalised  $U_{ij}$  tensor.**

| Atom | x          | y          | z           | U(eq)   |
|------|------------|------------|-------------|---------|
| O2   | 5261.1(11) | 4281.3(9)  | 7193.1(10)  | 54.1(3) |
| O1   | 5933.0(12) | 3340.0(9)  | 10384.0(12) | 57.8(3) |
| O3   | 1294.6(12) | 4619.5(11) | 2721.2(13)  | 66.1(4) |
| N1   | 6863.1(13) | 4606(1)    | 10022.8(12) | 49.1(4) |
| C4   | 6440.8(13) | 3728.2(11) | 9764.9(13)  | 42.5(4) |
| C3   | 6680.3(14) | 3202.1(11) | 8733.9(14)  | 42.6(4) |
| C9   | 4283.8(14) | 4332.5(11) | 6050.8(14)  | 44.8(4) |
| C15  | 7950.9(8)  | 2802.9(8)  | 9124(1)     | 45.2(4) |
| C16  | 8237.1(9)  | 2213.1(9)  | 8313.2(8)   | 56.8(4) |
| C17  | 9386.9(11) | 1821.5(10) | 8687.5(11)  | 67.0(5) |
| C18  | 10250.5(9) | 2019.6(11) | 9872.5(12)  | 71.1(6) |
| C19  | 9964.3(9)  | 2609.3(12) | 10683.4(10) | 72.7(6) |
| C20  | 8814.5(10) | 3000.9(9)  | 10309.1(9)  | 59.8(5) |
| C1   | 5990.1(15) | 3482.1(12) | 7379.2(14)  | 46.3(4) |
| C12  | 2280.8(14) | 4577.0(12) | 3849.7(16)  | 49.2(4) |
| C14  | 4017.5(16) | 3667.9(12) | 5109.7(16)  | 51.7(4) |
| C2   | 5623.5(15) | 2624.5(12) | 7866.6(16)  | 51.3(4) |
| C5   | 6722.5(18) | 5134.5(14) | 11056.9(17) | 60.1(5) |
| C11  | 2552.2(17) | 5239.9(13) | 4784.0(18)  | 57.8(5) |
| C13  | 3015.0(17) | 3800.7(13) | 4007.3(17)  | 55.7(4) |
| C8   | 7413.7(18) | 5186.0(14) | 9327.8(18)  | 58.7(5) |
| C10  | 3557.7(18) | 5113.1(13) | 5888.9(17)  | 57.2(5) |
| C6   | 7133(2)    | 6120.7(16) | 10911(3)    | 78.0(7) |
| C7   | 7081(2)    | 6163.0(16) | 9582(3)     | 83.2(7) |
| C21  | 558(2)     | 5425(2)    | 2498(3)     | 86.8(8) |

**Table 9. Anisotropic Displacement Parameters ( $\text{\AA}^2 \times 10^3$ ) for 15cb. The Anisotropic displacement factor exponent takes the form:  $-2\pi^2[h^2a^{*2}U_{11}+2hka^*b^*U_{12}+\dots]$ .**

| Atom | $U_{11}$ | $U_{22}$ | $U_{33}$ | $U_{23}$ | $U_{13}$ | $U_{12}$ |
|------|----------|----------|----------|----------|----------|----------|
| O2   | 63.4(7)  | 48.6(7)  | 39.4(6)  | -4.7(5)  | 7.4(5)   | 9.6(5)   |
| O1   | 69.6(8)  | 60.5(8)  | 52.4(7)  | 8.8(5)   | 33.5(6)  | 1.1(6)   |
| O3   | 54.4(7)  | 76.3(9)  | 53.6(7)  | 5.4(6)   | 4.8(6)   | 5.9(6)   |
| N1   | 57.5(8)  | 50.2(8)  | 41.2(7)  | -3.0(6)  | 20.5(6)  | 0.8(6)   |
| C4   | 44.7(7)  | 45.5(8)  | 36.3(7)  | 5.7(6)   | 14.2(6)  | 5.3(6)   |
| C3   | 46.5(8)  | 43.3(8)  | 36.9(7)  | 0.9(6)   | 14.5(6)  | 0.9(6)   |

|     |          |          |           |           |          |          |
|-----|----------|----------|-----------|-----------|----------|----------|
| C9  | 51.7(8)  | 43.1(8)  | 37.1(8)   | 2.2(6)    | 14.0(6)  | 1.8(6)   |
| C15 | 48.5(8)  | 47.0(8)  | 40.3(8)   | 1.2(6)    | 17.0(6)  | 1.2(6)   |
| C16 | 62.1(10) | 59.4(10) | 47.1(9)   | -5.8(8)   | 18.5(8)  | 8.7(8)   |
| C17 | 69.4(11) | 73.0(13) | 62.7(11)  | -6.9(9)   | 29.7(9)  | 17.1(10) |
| C18 | 52.3(10) | 87.1(15) | 72.4(13)  | -7.0(11)  | 22.0(9)  | 14(1)    |
| C19 | 50.2(10) | 95.3(16) | 62.1(11)  | -12.8(11) | 9.5(8)   | 11.9(10) |
| C20 | 53.0(9)  | 74.7(12) | 47.5(9)   | -10.5(8)  | 14.3(7)  | 9.0(8)   |
| C1  | 53.4(8)  | 46.8(8)  | 36.0(7)   | -1.7(6)   | 13.7(6)  | 5.8(7)   |
| C12 | 46.6(8)  | 54.6(9)  | 44.3(8)   | 9.0(7)    | 14.9(7)  | 0.6(7)   |
| C14 | 57.7(9)  | 45.9(9)  | 46.6(9)   | -3.0(7)   | 14.0(7)  | 7.8(7)   |
| C2  | 51.2(8)  | 47.6(9)  | 50.1(9)   | -5.1(7)   | 13.5(7)  | -1.8(7)  |
| C5  | 64.8(10) | 63.2(11) | 48.1(9)   | -11.9(8)  | 16.9(8)  | 12.0(8)  |
| C11 | 62.9(10) | 50.9(9)  | 56.4(10)  | 6.5(8)    | 19.0(8)  | 14.0(8)  |
| C13 | 60.7(10) | 53.7(10) | 45.5(9)   | -6.0(7)   | 11.8(7)  | 2.8(8)   |
| C8  | 63.3(10) | 57.4(10) | 54.9(10)  | -1.2(8)   | 21.9(8)  | -12.5(8) |
| C10 | 73.3(11) | 45.9(9)  | 47.1(9)   | -4.0(7)   | 16.9(8)  | 9.4(8)   |
| C6  | 68.5(12) | 62.1(12) | 97.1(17)  | -26.6(12) | 24.1(11) | 2.3(9)   |
| C7  | 86.5(15) | 53.3(12) | 108.2(19) | 4.5(12)   | 35.2(14) | -6.4(10) |
| C21 | 65.3(12) | 90.6(17) | 81.0(15)  | 15.9(13)  | 1.3(11)  | 19.9(12) |

**Table 10. Bond Lengths for 15cb.**

| Atom | Atom | Length/Å   | Atom | Atom | Length/Å |
|------|------|------------|------|------|----------|
| O2   | C9   | 1.3884(19) | C15  | C16  | 1.3900   |
| O2   | C1   | 1.399(2)   | C15  | C20  | 1.3900   |
| O1   | C4   | 1.2273(19) | C16  | C17  | 1.3900   |
| O3   | C12  | 1.383(2)   | C17  | C18  | 1.3900   |
| O3   | C21  | 1.409(3)   | C18  | C19  | 1.3900   |
| N1   | C4   | 1.339(2)   | C19  | C20  | 1.3900   |
| N1   | C5   | 1.469(2)   | C1   | C2   | 1.478(2) |
| N1   | C8   | 1.466(2)   | C12  | C11  | 1.373(3) |
| C4   | C3   | 1.518(2)   | C12  | C13  | 1.380(3) |
| C3   | C15  | 1.5196(16) | C14  | C13  | 1.387(2) |
| C3   | C1   | 1.513(2)   | C5   | C6   | 1.518(3) |
| C3   | C2   | 1.519(2)   | C11  | C10  | 1.389(3) |
| C9   | C14  | 1.381(2)   | C8   | C7   | 1.506(3) |
| C9   | C10  | 1.378(2)   | C6   | C7   | 1.506(4) |

**Table 11. Bond Angles for 15cb.**

| Atom | Atom | Atom | Angle/°    | Atom | Atom | Atom | Angle/°    |
|------|------|------|------------|------|------|------|------------|
| C9   | O2   | C1   | 115.98(12) | C17  | C16  | C15  | 120.0      |
| C12  | O3   | C21  | 117.18(17) | C16  | C17  | C18  | 120.0      |
| C4   | N1   | C5   | 120.58(15) | C17  | C18  | C19  | 120.0      |
| C4   | N1   | C8   | 127.93(14) | C20  | C19  | C18  | 120.0      |
| C8   | N1   | C5   | 111.35(15) | C19  | C20  | C15  | 120.0      |
| O1   | C4   | N1   | 121.32(15) | O2   | C1   | C3   | 115.86(13) |
| O1   | C4   | C3   | 120.70(14) | O2   | C1   | C2   | 118.30(15) |
| N1   | C4   | C3   | 117.86(13) | C2   | C1   | C3   | 61.05(10)  |
| C4   | C3   | C15  | 114.64(11) | C11  | C12  | O3   | 124.58(16) |
| C4   | C3   | C2   | 115.10(13) | C11  | C12  | C13  | 119.92(16) |
| C1   | C3   | C4   | 118.87(13) | C13  | C12  | O3   | 115.51(16) |
| C1   | C3   | C15  | 119.69(12) | C9   | C14  | C13  | 118.99(16) |
| C1   | C3   | C2   | 58.33(11)  | C1   | C2   | C3   | 60.62(10)  |
| C2   | C3   | C15  | 118.58(13) | N1   | C5   | C6   | 104.12(17) |
| C14  | C9   | O2   | 124.46(14) | C12  | C11  | C10  | 119.42(16) |
| C10  | C9   | O2   | 115.46(14) | C12  | C13  | C14  | 120.96(16) |
| C10  | C9   | C14  | 120.09(15) | N1   | C8   | C7   | 102.10(17) |
| C16  | C15  | C3   | 120.00(8)  | C9   | C10  | C11  | 120.62(16) |
| C16  | C15  | C20  | 120.0      | C7   | C6   | C5   | 104.96(17) |
| C20  | C15  | C3   | 119.96(8)  | C8   | C7   | C6   | 104.29(19) |

**Table 12. Hydrogen Atom Coordinates ( $\text{\AA} \times 10^4$ ) and Isotropic Displacement Parameters ( $\text{\AA}^2 \times 10^3$ ) for 15cb.**

| Atom | x        | y       | z        | U(eq) |
|------|----------|---------|----------|-------|
| H16  | 7659.37  | 2080.6  | 7520.31  | 68    |
| H17  | 9578.39  | 1426.92 | 8144.95  | 80    |
| H18  | 11019.73 | 1757.51 | 10122.93 | 85    |
| H19  | 10542.07 | 2741.8  | 11476.27 | 87    |
| H20  | 8623.05  | 3395.49 | 10851.65 | 72    |
| H1   | 6404.91  | 3391.48 | 6797.13  | 56    |
| H14  | 4503.17  | 3139.27 | 5213.48  | 62    |
| H2A  | 5803.39  | 2023.73 | 7579.71  | 62    |
| H2B  | 4872.4   | 2644.03 | 8007.55  | 62    |
| H5A  | 7223.82  | 4870.18 | 11865.04 | 72    |
| H5B  | 5885.32  | 5133.15 | 10982.14 | 72    |
| H11  | 2067.07  | 5769.01 | 4678     | 69    |
| H13  | 2834.89  | 3360.01 | 3364.95  | 67    |
| H8A  | 7075.47  | 5042.98 | 8436.05  | 70    |

|      |         |         |          |     |
|------|---------|---------|----------|-----|
| H8B  | 8284.93 | 5102.82 | 9645.56  | 70  |
| H10  | 3742.81 | 5559.15 | 6525.42  | 69  |
| H6A  | 6598.69 | 6584.94 | 11042.63 | 94  |
| H6B  | 7951.1  | 6232.47 | 11507.73 | 94  |
| H7A  | 6274.03 | 6328.02 | 9000.3   | 100 |
| H7B  | 7652.39 | 6619.78 | 9506.64  | 100 |
| H21A | -71.1   | 5386.13 | 1675.93  | 130 |
| H21B | 1040.27 | 5973.82 | 2548.83  | 130 |
| H21C | 201.49  | 5463.22 | 3118.67  | 130 |

## Experimental

Single crystals of  $C_{21}H_{23}NO_3$  (**15cb**) were obtained via crystallization of the material purified by column chromatography. This material was dissolved in a mixture of hexane and diethyl ether, and ether was allowed to evaporate slowly at room temperature. A suitable crystal was selected and **mounted on the glass stick with acrylic glue**, and the reflections were registered on a **SuperNova, Dual, Cu at zero, AtlasS2** diffractometer. The crystal was kept at 293(2) K during data collection. The structure was solved with the ShelXT [1] structure solution program under Olex2 interface [2], using Intrinsic Phasing and refined with the ShelXL [1] refinement package using Least Squares minimization.

1. Sheldrick, G.M. (2015). Acta Cryst. A71, 3-8.
2. Dolomanov, O.V., Bourhis, L.J., Gildea, R.J, Howard, J.A.K. & Puschmann, H. (2009), J. Appl. Cryst. 42, 339-341.

### Crystal structure determination of 15cb

**Crystal Data** for  $C_{21}H_{23}NO_3$  ( $M=337.40$  g/mol): monoclinic, space group  $P2_1/c$  (no. 14),  $a = 11.9367(4)$  Å,  $b = 14.2449(4)$  Å,  $c = 11.4918(3)$  Å,  $\beta = 112.287(4)^\circ$ ,  $V = 1808.07(10)$  Å<sup>3</sup>,  $Z = 4$ ,  $T = 293(2)$  K,  $\mu(\text{CuK}\alpha) = 0.661$  mm<sup>-1</sup>,  $D_{\text{calc}} = 1.239$  g/cm<sup>3</sup>, 11506 reflections measured ( $8.004^\circ \leq 2\theta \leq 136.496^\circ$ ), 3304 unique ( $R_{\text{int}} = 0.0411$ ,  $R_{\text{sigma}} = 0.0263$ ) which were used in all calculations. The final  $R_1$  was 0.0592 ( $I > 2\sigma(I)$ ) and  $wR_2$  was 0.1717 (all data).

### Refinement model description

Number of restraints - 0, number of constraints - unknown.

#### Details:

1. Fixed Uiso
  - At 1.2 times of:
    - All C(H) groups, All C(H,H) groups
  - At 1.5 times of:
    - All C(H,H,H) groups
- 2.a Ternary CH refined with riding coordinates:
  - C1(H1)
- 2.b Secondary CH2 refined with riding coordinates:
  - C2(H2A,H2B), C5(H5A,H5B), C8(H8A,H8B), C6(H6A,H6B), C7(H7A,H7B)
- 2.c Aromatic/amide H refined with riding coordinates:
  - C16(H16), C17(H17), C18(H18), C19(H19), C20(H20), C14(H14), C11(H11), C13(H13), C10(H10)
- 2.d Fitted hexagon refined as free rotating group:
  - C15(C16,C17,C18,C19,C20)
- 2.e Idealised Me refined as rotating group:
  - C21(H21A,H21B,H21C)

This report has been created with Olex2, compiled on 2017.03.28 svn.r3405 for OlexSys.
